# Supplementary material for: Large language model analysis reveals key reasons behind massive farmer protests in Europe
Source: Research Square preprint supplement (doi:10.21203/rs.3.rs-6652927/v1), 2025-06-18
Supplement: Supplementary file 2 [file S2_comparison_table.pdf › supplementary_materials/S2_comparison_table.pdf]

|   | Author x                                                                                                                                                                                                                                                                                                                                                                                                                                                                                                                                                                                                                                                                                                                                                                                                                                                                                                                                                                                                                                                                                                                                                                                                                                                                                                                                                                                                                                                                                                                                                                                                                                                                                                                                                                                                                                                                                                                                                                                                                                                                                                                                                                                                                                                                                                            | Author y                                                                                                                                                                                                                                                                                                                                                                                                                                                                                                                                                                                                                                                                                                                                                                                                                                                                                                                                                                                                                                                                                                                                                                                                                                                                                                                                                                                                                                                                                                                                                                                                                                                                                                                                                                                                                                                                                                                                                                                                                                                                                                                                                                                                                                                                 | Note:                                                                                                                                                         |
|---|---------------------------------------------------------------------------------------------------------------------------------------------------------------------------------------------------------------------------------------------------------------------------------------------------------------------------------------------------------------------------------------------------------------------------------------------------------------------------------------------------------------------------------------------------------------------------------------------------------------------------------------------------------------------------------------------------------------------------------------------------------------------------------------------------------------------------------------------------------------------------------------------------------------------------------------------------------------------------------------------------------------------------------------------------------------------------------------------------------------------------------------------------------------------------------------------------------------------------------------------------------------------------------------------------------------------------------------------------------------------------------------------------------------------------------------------------------------------------------------------------------------------------------------------------------------------------------------------------------------------------------------------------------------------------------------------------------------------------------------------------------------------------------------------------------------------------------------------------------------------------------------------------------------------------------------------------------------------------------------------------------------------------------------------------------------------------------------------------------------------------------------------------------------------------------------------------------------------------------------------------------------------------------------------------------------------|--------------------------------------------------------------------------------------------------------------------------------------------------------------------------------------------------------------------------------------------------------------------------------------------------------------------------------------------------------------------------------------------------------------------------------------------------------------------------------------------------------------------------------------------------------------------------------------------------------------------------------------------------------------------------------------------------------------------------------------------------------------------------------------------------------------------------------------------------------------------------------------------------------------------------------------------------------------------------------------------------------------------------------------------------------------------------------------------------------------------------------------------------------------------------------------------------------------------------------------------------------------------------------------------------------------------------------------------------------------------------------------------------------------------------------------------------------------------------------------------------------------------------------------------------------------------------------------------------------------------------------------------------------------------------------------------------------------------------------------------------------------------------------------------------------------------------------------------------------------------------------------------------------------------------------------------------------------------------------------------------------------------------------------------------------------------------------------------------------------------------------------------------------------------------------------------------------------------------------------------------------------------------|---------------------------------------------------------------------------------------------------------------------------------------------------------------|
| 1 | <p>  <b>**Rising Production Costs**</b>   Protests driven by the increasing costs of production, including fuel, fertilizers, and other agricultural inputs.</p> <p> </p> <p>  Production Costs   Protests related to the rising costs of production, including high insurance fees, fuel prices, and energy costs.  </p> <p>  <b>**High Production Costs**</b>   Protests over rising production costs, including energy, fuel, insurance, and fertilizers, which affect farm profitability.  </p> <p>  <b>**Rising Production Costs**</b>   Protests driven by the increasing costs of production, including fuel, fertilizers, and other agricultural inputs.</p> <p> </p> <p>  Production Costs   Protests related to the rising costs of production, including high insurance fees, fuel prices, and energy costs.  </p> <p>  <b>**High Production Costs**</b>   Protests highlighting high production costs including those related to fuel, taxes, insurance, energy, and fertilizer.  </p> <p>  <b>**Rising Production Costs**</b>   Protests driven by the increasing costs of production, including fuel, fertilizers, and other agricultural inputs.</p> <p> </p> <p>  Production Costs   Protests related to the rising costs of production, including high insurance fees, fuel prices, and energy costs.  </p> <p>  <b>**High Production Costs**</b>   Demonstrations focusing on rising production costs, fuel prices, insurance fees, and general financial pressure on farmers.  </p> <p>  <b>**Rising Production Costs**</b>   Protests driven by the increasing costs of production, including fuel, fertilizers, and other agricultural inputs.</p> <p> </p> <p>  Production Costs   Protests related to the rising costs of production, including high insurance fees, fuel prices, and energy costs.  </p> <p>  <b>**Rising Production Costs**</b>   Protests driven by the increasing costs of production, including fuel, fertilizers, and other agricultural inputs.</p> <p> </p> <p>  Production Costs   Protests related to the rising costs of production, including high insurance fees, fuel prices, and energy costs.  </p> <p>  <b>**High Production Costs**</b>   Protests highlighting high production costs including those related to fuel, taxes, insurance, and energy.  </p> | <p>  <b>**Rising Production Costs**</b>   Protests driven by the increasing costs of production, including fuel, fertilizers, and other agricultural inputs.  </p> <p>  Production Costs   Protests related to the rising costs of production, including high insurance fees, fuel prices, and energy costs.  </p> <p>  <b>**High Production Costs**</b>   Protests over rising production costs, including energy, fuel, insurance, and fertilizers, which affect farm profitability.  </p> <p>  <b>**Rising Production Costs**</b>   Protests driven by the increasing costs of production, including fuel, fertilizers, and other agricultural inputs.</p> <p>  Production Costs   Protests related to the rising costs of production, including high insurance fees, fuel prices, and energy costs.  </p> <p>  <b>**High Production Costs**</b>   Protests highlighting high production costs including those related to fuel, taxes, insurance, energy, and fertilizer.  </p> <p>  <b>**Rising Production Costs**</b>   Protests driven by the increasing costs of production, including fuel, fertilizers, and other agricultural inputs.</p> <p>  Production Costs   Protests related to the rising costs of production, including high insurance fees, fuel prices, and energy costs.  </p> <p>  <b>**High Production Costs**</b>   Demonstrations focusing on rising production costs, fuel prices, insurance fees, and general financial pressure on farmers.  </p> <p>  <b>**Rising Production Costs**</b>   Protests driven by the increasing costs of production, including fuel, fertilizers, and other agricultural inputs.</p> <p>  Production Costs   Protests related to the rising costs of production, including high insurance fees, fuel prices, and energy costs.  </p> <p>  <b>**Rising Production Costs**</b>   Protests driven by the increasing costs of production, including fuel, fertilizers, and other agricultural inputs.</p> <p>  Production Costs   Protests related to the rising costs of production, including high insurance fees, fuel prices, and energy costs.  </p> <p>  <b>**High Production Costs**</b>   Protests highlighting high production costs including those related to fuel, taxes, insurance, and energy.  </p> | Author x and y agreement.                                                                                                                                     |
| 2 | <p>  <b>**Environmental Regulations**</b>   Protests against stricter environmental regulations and norms, including those restricting the use of pesticides and other chemicals deemed necessary by farmers.  </p> <p>  <b>**EU Agricultural Standards and Policies**</b>   Protests against EU regulations and standards, including the "Green Deal" and pesticide use, which are perceived as bureaucratic and excessively restrictive by farmers.  </p> <p>  Environmental Regulations   Protests against stricter environmental norms, such as those restricting the use of pesticides and regulations related to the so-called Green Deal.  </p> <p>  <b>**Environmental Regulations**</b>   Protests against stricter environmental norms and regulations, such as limitations on pesticide use and policies related to nitrogen emissions.  </p> <p>  <b>**EU Agricultural Standards and Policies**</b>   Protests against EU regulations and standards, including the "Green Deal" and pesticide use, which are perceived as bureaucratic and excessively restrictive by farmers.  </p> <p>  <b>**Environmental Norms**</b>   Protests targeting stricter environmental regulations and norms, including those related to nitrogen policies, which impact farming practices and profitability.  </p>                                                                                                                                                                                                                                                                                                                                                                                                                                                                                                                                                                                                                                                                                                                                                                                                                                                                                                                                                                                                       | <p>  <b>**EU Agricultural Standards and Policies**</b>   Protests against EU regulations and standards, including the "Green Deal" and pesticide use, which are perceived as bureaucratic and excessively restrictive by farmers.</p> <p>  EU Agricultural Policies   Protests targeting overall EU agricultural standards and policies, particularly the ratification of EU's free-trade agreements.  </p> <p>  <b>**EU Agricultural Policies**</b>   Protests against various agricultural policies set by the European Union, including the Green Deal, and Common Agricultural Policy.  </p> <p>  <b>**EU Agricultural Standards and Policies**</b>   Protests against EU regulations and standards, including the "Green Deal" and pesticide use, which are perceived as bureaucratic and excessively restrictive by farmers.  </p> <p>  EU Agricultural Policies   Protests targeting overall EU agricultural standards and policies, particularly the ratification of EU's free-trade agreements.  </p> <p>  <b>**EU Agricultural Standards and Policies**</b>   Protests against EU regulations and standards, including the "Green Deal" and pesticide use, which are perceived as bureaucratic and excessively restrictive by farmers.  </p> <p>  EU Agricultural Policies   Protests targeting overall EU agricultural standards and policies, particularly the ratification of EU's free-trade agreements.  </p>                                                                                                                                                                                                                                                                                                                                                                                                                                                                                                                                                                                                                                                                                                                                                                                                                                             | Author x did not separate 2 and 3, whereas Author y did. All authors agree to combine 2 and 3 because they provide very similar or even the same information. |

|   |                                                                                                                                                                                                                                                                                                                                                                                                                                                                                                                                                                                                                                                                                                                                                                                                                                                                                                                                                                                                                                                                                                                                                                                                                                                                                                                                                                                                                                                                                                                                                                                                                                                                                                                                                                                                                                                                                                                                                                                                                                                                                                                                                                                                                                                                                                                                                                                                                                                                                                                                                                                                                                                                                                                                                                                                                                                                                                                                                                                                                                                                                                                                                        |                                                                                                                                                                                                                                                                                                                                                                                                                                                                                                                                                                                                                                            |  |
|---|--------------------------------------------------------------------------------------------------------------------------------------------------------------------------------------------------------------------------------------------------------------------------------------------------------------------------------------------------------------------------------------------------------------------------------------------------------------------------------------------------------------------------------------------------------------------------------------------------------------------------------------------------------------------------------------------------------------------------------------------------------------------------------------------------------------------------------------------------------------------------------------------------------------------------------------------------------------------------------------------------------------------------------------------------------------------------------------------------------------------------------------------------------------------------------------------------------------------------------------------------------------------------------------------------------------------------------------------------------------------------------------------------------------------------------------------------------------------------------------------------------------------------------------------------------------------------------------------------------------------------------------------------------------------------------------------------------------------------------------------------------------------------------------------------------------------------------------------------------------------------------------------------------------------------------------------------------------------------------------------------------------------------------------------------------------------------------------------------------------------------------------------------------------------------------------------------------------------------------------------------------------------------------------------------------------------------------------------------------------------------------------------------------------------------------------------------------------------------------------------------------------------------------------------------------------------------------------------------------------------------------------------------------------------------------------------------------------------------------------------------------------------------------------------------------------------------------------------------------------------------------------------------------------------------------------------------------------------------------------------------------------------------------------------------------------------------------------------------------------------------------------------------------|--------------------------------------------------------------------------------------------------------------------------------------------------------------------------------------------------------------------------------------------------------------------------------------------------------------------------------------------------------------------------------------------------------------------------------------------------------------------------------------------------------------------------------------------------------------------------------------------------------------------------------------------|--|
|   | <p>  Environmental Regulations   Protests against stricter environmental norms, such as those restricting the use of pesticides and regulations related to the so-called Green Deal.  </p> <p>  <b>**Environmental Regulations**</b>   Demonstrations opposing stricter environmental norms, such as those restricting pesticide use or involving the so-called Green Deal.  </p> <p>  <b>**EU Agricultural Standards and Policies**</b>   Protests against EU regulations and standards, including the "Green Deal" and pesticide use, which are perceived as bureaucratic and excessively restrictive by farmers.  </p> <p>  Environmental Regulations   Protests against stricter environmental norms, such as those restricting the use of pesticides and regulations related to the so-called Green Deal.  </p> <p>  <b>**Environmental Norms &amp; Bureaucracy**</b>   Protests against stricter environmental regulations, the EU's Green Deal, bureaucratic constraints, and related impacts on farming practices.  </p> <p>  <b>**EU Agricultural Standards and Policies**</b>   Protests against EU regulations and standards, including the "Green Deal" and pesticide use, which are perceived as bureaucratic and excessively restrictive by farmers.  </p> <p>  Environmental Regulations   Protests against stricter environmental norms, such as those restricting the use of pesticides and regulations related to the so-called Green Deal.  </p> <p>  Environmental and Health Regulations   Protests related to stricter environmental norms, pesticide restrictions, and health-related regulations imposed by national or EU authorities.  </p> <p>  <b>**Environmental Norms and Impact**</b>   Protests focused on stringent environmental norms and regulations affecting agriculture, including nitrogen policies and CO2 taxes.  </p> <p>  Environmental Regulations   Protests against stricter environmental norms, such as those restricting the use of pesticides and regulations related to the so-called Green Deal.  </p> <p>  <b>**Environmental Regulations**</b>   Demonstrations opposing stricter environmental norms, such as those restricting pesticide use or involving the so-called Green Deal.  </p> <p>  <b>**EU Agricultural Standards and Policies**</b>   Protests against EU regulations and standards, including the "Green Deal" and pesticide use, which are perceived as bureaucratic and excessively restrictive.  </p> <p>  <b>**Environmental Norms and Fertilizer Use**</b>   Demonstrations against stricter environmental regulations, particularly those governing the use of fertilizers, pesticides, and other agricultural chemicals.  </p> <p>  Nitrogen Policy and Green Deal   Protests against national nitrogen policies or the EU's Green Deal seen as overly restrictive and harmful to agricultural productivity.  </p> <p>  <b>**Trade and Labor Regulations**</b>   Protests focused on the unfair competition from imported goods that do not meet the same standards as domestic products, including livestock and grain, as well as general trade and labor rules.  </p> | <p>  <b>**EU Agricultural Standards and Policies**</b>   Protests against EU regulations and standards, including the "Green Deal" and pesticide use, which are perceived as bureaucratic and excessively restrictive by farmers.  </p> <p>  EU Agricultural Policies   Protests targeting overall EU agricultural standards and policies, particularly the ratification of EU's free-trade agreements.  </p> <p>  <b>**EU Agricultural Standards and Policies**</b>   Protests against EU regulations and standards, including the "Green Deal" and pesticide use, which are perceived as bureaucratic and excessively restrictive.  </p> |  |
| 3 |                                                                                                                                                                                                                                                                                                                                                                                                                                                                                                                                                                                                                                                                                                                                                                                                                                                                                                                                                                                                                                                                                                                                                                                                                                                                                                                                                                                                                                                                                                                                                                                                                                                                                                                                                                                                                                                                                                                                                                                                                                                                                                                                                                                                                                                                                                                                                                                                                                                                                                                                                                                                                                                                                                                                                                                                                                                                                                                                                                                                                                                                                                                                                        | <p>  <b>**Environmental Regulations**</b>   Protests against stricter environmental regulations and norms, including those restricting the use of pesticides and other chemicals deemed necessary by farmers.  </p> <p>  Environmental Regulations   Protests against stricter environmental norms, such as those restricting the use of pesticides and regulations related to the so-called Green Deal.  </p> <p>  <b>**Environmental Regulations**</b>   Protests against stricter environmental norms and regulations, such as limitations on pesticide use and policies related to nitrogen emissions.  </p>                           |  |

|   |                                                                                                                                                                                                                                                                                                                                                                                                                                                                                                                                                                                                                                                                                                                                                                                                                                                                                                                                                                                                                                                                                                                            |                                                                                                                                                                                                                                                                                                                                                                                                                                                                                                                                                                                                                                                                                                                                                                                                                                                                                                                                                                                                                                                                                                                                                                                                                                                                                                                                                                                                                                                                                                                                                                                                                                                                                                                                                                                                                                                                                                                                                                                                                                                                                                                                                                                                                                                                                                                                                                                                                                                                                                                                                                                                                                           |                           |
|---|----------------------------------------------------------------------------------------------------------------------------------------------------------------------------------------------------------------------------------------------------------------------------------------------------------------------------------------------------------------------------------------------------------------------------------------------------------------------------------------------------------------------------------------------------------------------------------------------------------------------------------------------------------------------------------------------------------------------------------------------------------------------------------------------------------------------------------------------------------------------------------------------------------------------------------------------------------------------------------------------------------------------------------------------------------------------------------------------------------------------------|-------------------------------------------------------------------------------------------------------------------------------------------------------------------------------------------------------------------------------------------------------------------------------------------------------------------------------------------------------------------------------------------------------------------------------------------------------------------------------------------------------------------------------------------------------------------------------------------------------------------------------------------------------------------------------------------------------------------------------------------------------------------------------------------------------------------------------------------------------------------------------------------------------------------------------------------------------------------------------------------------------------------------------------------------------------------------------------------------------------------------------------------------------------------------------------------------------------------------------------------------------------------------------------------------------------------------------------------------------------------------------------------------------------------------------------------------------------------------------------------------------------------------------------------------------------------------------------------------------------------------------------------------------------------------------------------------------------------------------------------------------------------------------------------------------------------------------------------------------------------------------------------------------------------------------------------------------------------------------------------------------------------------------------------------------------------------------------------------------------------------------------------------------------------------------------------------------------------------------------------------------------------------------------------------------------------------------------------------------------------------------------------------------------------------------------------------------------------------------------------------------------------------------------------------------------------------------------------------------------------------------------------|---------------------------|
|   |                                                                                                                                                                                                                                                                                                                                                                                                                                                                                                                                                                                                                                                                                                                                                                                                                                                                                                                                                                                                                                                                                                                            | <p>  <b>**Environmental Norms**</b>   Protests targeting stricter environmental regulations and norms, including those related to nitrogen policies, which impact farming practices and profitability.  </p> <p>  <b>**Environmental and Sustainability Advocacy**</b>   Protests advocating for sustainable agricultural practices and highlighting environmental concerns, sometimes conflicting with other demands for reduced restrictions.  </p> <p>  Environmental Regulations   Protests against stricter environmental norms, such as those restricting the use of pesticides and regulations related to the so-called Green Deal.  </p> <p>  <b>**Environmental Regulations**</b>   Demonstrations opposing stricter environmental norms, such as those restricting pesticide use or involving the so-called Green Deal.  </p> <p>  Environmental Regulations   Protests against stricter environmental norms, such as those restricting the use of pesticides and regulations related to the so-called Green Deal.  </p> <p>  <b>**Environmental Norms &amp; Bureaucracy**</b>   Protests against stricter environmental regulations, the EU's Green Deal, bureaucratic constraints, and related impacts on farming practices.  </p> <p>  <b>**Environmental Norms and Fertilizer Use**</b>   Demonstrations against stricter environmental regulations, particularly those governing the use of fertilizers, pesticides, and other agricultural chemicals.  </p> <p>  Environmental Regulations   Protests against stricter environmental norms, such as those restricting the use of pesticides and regulations related to the so-called Green Deal.  </p> <p>  Environmental and Health Regulations   Protests related to stricter environmental norms, pesticide restrictions, and health-related regulations imposed by national or EU authorities.  </p> <p>  Nitrogen Policy and Green Deal   Protests against national nitrogen policies or the EU's Green Deal seen as overly restrictive and harmful to agricultural productivity.  </p> <p>  <b>**Environmental Norms and Impact**</b>   Protests focused on stringent environmental norms and regulations affecting agriculture, including nitrogen policies and CO2 taxes.  </p> <p>  Environmental Regulations   Protests against stricter environmental norms, such as those restricting the use of pesticides and regulations related to the so-called Green Deal.  </p> <p>  <b>**Environmental Regulations**</b>   Demonstrations opposing stricter environmental norms, such as those restricting pesticide use or involving the so-called Green Deal.  </p> |                           |
| 4 | <p>  <b>**Trade and Labor Regulations**</b>   Protests focused on the unfair competition from imported goods that do not meet the same standards as domestic products, including livestock and grain, as well as general trade and labor rules.  </p> <p>  <b>**Free-Trade Agreements**</b>   Demonstrations opposing the ratification of the EU's free-trade agreements unless third countries comply with EU agricultural standards, aiming for fair competition and production prices.  </p> <p>  <b>**Free Trade Agreements**</b>   Opposition to ratification of EU's free-trade agreements until partner third countries comply with EU agricultural standards.  </p> <p>  <b>**Free-Trade Agreements**</b>   Demonstrations opposing the ratification of the EU's free-trade agreements unless third countries comply with EU agricultural standards, aiming to ensure fair prices for local farmers.  </p> <p>  <b>**EU Free-Trade Agreements**</b>   Demonstrations against the ratification of the EU's free-trade agreements, demanding compliance with EU agricultural standards from partner countries.  </p> | <p>  <b>**Free-Trade Agreements**</b>   Demonstrations opposing the ratification of the EU's free-trade agreements unless third countries comply with EU agricultural standards, aiming for fair competition and production prices.  </p> <p>  <b>**Free Trade Agreements**</b>   Opposition to ratification of EU's free-trade agreements until partner third countries comply with EU agricultural standards.  </p> <p>  <b>**Free-Trade Agreements**</b>   Demonstrations opposing the ratification of the EU's free-trade agreements unless third countries comply with EU agricultural standards, aiming to ensure fair prices for local farmers.  </p> <p>  <b>**Agricultural Trade and Market Protection**</b>   Actions against the extension or modification of agricultural trade practices that farmers believe negatively affect market stability and competition.  </p> <p>  Trade Agreements   Demonstrations opposing international trade agreements until partner countries comply with EU's agricultural standards.  </p> <p>  <b>**EU Free-Trade Agreements**</b>   Demonstrations against the ratification of the EU's free-trade agreements, demanding compliance with EU agricultural standards from partner countries.  </p>                                                                                                                                                                                                                                                                                                                                                                                                                                                                                                                                                                                                                                                                                                                                                                                                                                                                                                                                                                                                                                                                                                                                                                                                                                                                                                                                                                                        | Author x and y agreement. |

|   |                                                                                                                                                                                                                                                                                                                                                                                                                                                                                                                                                                                                                                                                                                                                                                                                                                                                                                                                                                                                                                                                                                                                                                                                                                                                                                                                                                                                                                                                                                                                                                                                                                                                                                                                                                                                                                                                                                                                                                                                                                                                                                                                                                                                                                                                                                                                                                                                                                                                                                                                                                                                                                                                                                                                                                                                                                                                                                                                                                                                                                                                                                                                                              |                                                                                                                                                                                                                                                                                                                                                                                                                                                                                                                                                                                                                                                                                                                                                                                                                                                                                                                                                                                                                                                                                                                                                                                                                                                                                                                                                                                                                                                                                                                                                                                                                                                                                                                                                                                                                                                                                                                                                                                                                                                                                                                                                                                                                                                                                                                                                                                                                         |                                                                                                       |
|---|--------------------------------------------------------------------------------------------------------------------------------------------------------------------------------------------------------------------------------------------------------------------------------------------------------------------------------------------------------------------------------------------------------------------------------------------------------------------------------------------------------------------------------------------------------------------------------------------------------------------------------------------------------------------------------------------------------------------------------------------------------------------------------------------------------------------------------------------------------------------------------------------------------------------------------------------------------------------------------------------------------------------------------------------------------------------------------------------------------------------------------------------------------------------------------------------------------------------------------------------------------------------------------------------------------------------------------------------------------------------------------------------------------------------------------------------------------------------------------------------------------------------------------------------------------------------------------------------------------------------------------------------------------------------------------------------------------------------------------------------------------------------------------------------------------------------------------------------------------------------------------------------------------------------------------------------------------------------------------------------------------------------------------------------------------------------------------------------------------------------------------------------------------------------------------------------------------------------------------------------------------------------------------------------------------------------------------------------------------------------------------------------------------------------------------------------------------------------------------------------------------------------------------------------------------------------------------------------------------------------------------------------------------------------------------------------------------------------------------------------------------------------------------------------------------------------------------------------------------------------------------------------------------------------------------------------------------------------------------------------------------------------------------------------------------------------------------------------------------------------------------------------------------------|-------------------------------------------------------------------------------------------------------------------------------------------------------------------------------------------------------------------------------------------------------------------------------------------------------------------------------------------------------------------------------------------------------------------------------------------------------------------------------------------------------------------------------------------------------------------------------------------------------------------------------------------------------------------------------------------------------------------------------------------------------------------------------------------------------------------------------------------------------------------------------------------------------------------------------------------------------------------------------------------------------------------------------------------------------------------------------------------------------------------------------------------------------------------------------------------------------------------------------------------------------------------------------------------------------------------------------------------------------------------------------------------------------------------------------------------------------------------------------------------------------------------------------------------------------------------------------------------------------------------------------------------------------------------------------------------------------------------------------------------------------------------------------------------------------------------------------------------------------------------------------------------------------------------------------------------------------------------------------------------------------------------------------------------------------------------------------------------------------------------------------------------------------------------------------------------------------------------------------------------------------------------------------------------------------------------------------------------------------------------------------------------------------------------------|-------------------------------------------------------------------------------------------------------|
|   | <p>  <b>**Free-Trade Agreements**</b>   Demonstrations opposing the ratification of the EU's free-trade agreements unless third countries comply with EU agricultural standards, aiming to ensure fair prices for local farmers.  </p> <p>  <b>**EU Free-Trade Agreements**</b>   Demonstrations against the ratification of the EU's free-trade agreements, demanding compliance with EU agricultural standards from partner countries.  </p> <p>  <b>**Free-Trade Agreements**</b>   Demonstrations opposing the ratification of the EU's free-trade agreements unless third countries comply with EU agricultural standards, aiming to ensure fair prices for local farmers.  </p> <p>  <b>**Free-Trade Agreements**</b>   Opposition to the EU's free-trade agreements until partner third countries comply with EU agricultural standards, aiming for fair competition and protection of local markets.  </p> <p>  <b>**EU Free-Trade Agreements**</b>   Demonstrations against the ratification of the EU's free-trade agreements, demanding compliance with EU agricultural standards from partner countries.  </p> <p>  Foreign Imports and Trade Agreements   Protests against the import of agricultural products from foreign countries (e.g., Ukraine), opposition to EU trade agreements deemed harmful to local farmers, and demands for fair competition.  </p> <p>  Trade Agreements   Demonstrations opposing international trade agreements until partner countries comply with EU's agricultural standards.  </p>                                                                                                                                                                                                                                                                                                                                                                                                                                                                                                                                                                                                                                                                                                                                                                                                                                                                                                                                                                                                                                                                                                                                                                                                                                                                                                                                                                                                                                                                                                                                                                                                                         | <p>  <b>**Agricultural Trade and Standards**</b>   Protests highlighting unfair competition from international agricultural products not meeting EU standards.  </p> <p>  <b>**Free-Trade Agreements**</b>   Demonstrations opposing the ratification of the EU's free-trade agreements unless third countries comply with EU agricultural standards, aiming to ensure fair prices for local farmers.  </p> <p>  <b>**EU Free-Trade Agreements**</b>   Demonstrations against the ratification of the EU's free-trade agreements, demanding compliance with EU agricultural standards from partner countries.  </p> <p>  <b>**Free-Trade Agreements**</b>   Demonstrations opposing the ratification of the EU's free-trade agreements unless third countries comply with EU agricultural standards, aiming to ensure fair prices for local farmers.  </p> <p>  <b>**Free-Trade Agreements**</b>   Opposition to the EU's free-trade agreements until partner third countries comply with EU agricultural standards, aiming for fair competition and protection of local markets.  </p> <p>  <b>**EU Free-Trade Agreements**</b>   Demonstrations against the ratification of the EU's free-trade agreements, demanding compliance with EU agricultural standards from partner countries.  </p>                                                                                                                                                                                                                                                                                                                                                                                                                                                                                                                                                                                                                                                                                                                                                                                                                                                                                                                                                                                                                                                                                                                         |                                                                                                       |
| 5 | <p>  <b>**Environmental Norms &amp; Bureaucracy**</b>   Protests against stricter environmental regulations, the EU's Green Deal, bureaucratic constraints, and related impacts on farming practices.  </p> <p>  <b>**Bureaucratic Constraints**</b>   Protests addressing excessive administrative burdens, including paperwork and compliance requirements, that farmers believe hinder their operational efficiency and sustainability.  </p> <p>  Bureaucratic Constraints   Protests focused on excessive bureaucracy, administrative burdens, and the complexity of regulatory frameworks affecting the farming sector.  </p> <p>  Bureaucratic Constraints   Demonstrations against excessive bureaucratic burdens related to agricultural processes, state support, and subsidies.  </p> <p>  <b>**Bureaucratic Constraints**</b>   Protests against excessive bureaucracy perceived as hindering agricultural work and state support.  </p> <p>  Bureaucratic Constraints   Demonstrations against excessive bureaucratic burdens related to agricultural processes, state support, and subsidies.  </p> <p>  <b>**Bureaucratic Constraints**</b>   Demonstrations against excessive bureaucratic processes and administrative burdens faced by farmers.  </p> <p>  <b>**Excessive Bureaucracy**</b>   Actions opposing the perceived excessive bureaucracy and administrative burdens placed on farmers, which are seen as stifling productivity and profitability.  </p> <p>  Bureaucratic Constraints   Demonstrations against excessive bureaucratic burdens related to agricultural processes, state support, and subsidies.  </p> <p>  <b>**Bureaucratic Constraints**</b>   Protests against perceived excessive bureaucracy in agricultural policies and administrative burdens.  </p> <p>  <b>**Bureaucratic Constraints**</b>   Protests addressing excessive administrative burdens, including paperwork and compliance requirements, that farmers believe hinder their operational efficiency and sustainability.  </p> <p>  Bureaucratic Constraints   Demonstrations against excessive bureaucratic burdens related to agricultural processes, state support, and subsidies.  </p> <p>  <b>**Bureaucratic Constraints**</b>   Protests addressing excessive administrative burdens, including paperwork and compliance requirements, that farmers believe hinder their operational efficiency and sustainability.  </p> <p>  Bureaucratic Constraints   Demonstrations against excessive bureaucratic burdens related to agricultural processes, state support, and subsidies.  </p> <p>  Bureaucratic Constraints   Protests focused on excessive bureaucracy, administrative burdens, and the complexity of regulatory frameworks affecting the farming sector.  </p> <p>  Administrative Burdens and Recognition   Protests highlighting excessive administrative burdens and demanding better recognition and consideration for farmers' work.  </p> <p>  <b>**Bureaucratic Constraints**</b>   Protests against excessive bureaucratic constraints that complicate farming operations and increase administrative burdens.  </p> | <p>  Bureaucratic Constraints   Demonstrations against excessive bureaucratic burdens related to agricultural processes, state support, and subsidies.  </p> <p>  <b>**Bureaucratic Constraints**</b>   Demonstrations against excessive bureaucratic processes and administrative burdens faced by farmers.  </p> <p>  <b>**Excessive Bureaucracy**</b>   Actions opposing the perceived excessive bureaucracy and administrative burdens placed on farmers, which are seen as stifling productivity and profitability.  </p> <p>  <b>**Anti-Bureaucracy and Administrative Burden**</b>   Actions highlighting the administrative burden and the need to simplify processes and reduce red tape for more efficient farming operations.  </p> <p>  Bureaucratic Constraints   Demonstrations against excessive bureaucratic burdens related to agricultural processes, state support, and subsidies.  </p> <p>  <b>**Bureaucratic Constraints**</b>   Protests against perceived excessive bureaucracy in agricultural policies and administrative burdens.  </p> <p>  <b>**Bureaucratic Constraints**</b>   Protests addressing excessive administrative burdens, including paperwork and compliance requirements, that farmers believe hinder their operational efficiency and sustainability.  </p> <p>  Bureaucratic Constraints   Demonstrations against excessive bureaucratic burdens related to agricultural processes, state support, and subsidies.  </p> <p>  <b>**Bureaucratic Constraints**</b>   Protests addressing excessive administrative burdens, including paperwork and compliance requirements, that farmers believe hinder their operational efficiency and sustainability.  </p> <p>  Bureaucratic Constraints   Demonstrations against excessive bureaucratic burdens related to agricultural processes, state support, and subsidies.  </p> <p>  Bureaucratic Constraints   Protests focused on excessive bureaucracy, administrative burdens, and the complexity of regulatory frameworks affecting the farming sector.  </p> <p>  Administrative Burdens and Recognition   Protests highlighting excessive administrative burdens and demanding better recognition and consideration for farmers' work.  </p> <p>  <b>**Bureaucratic Constraints**</b>   Protests against excessive bureaucratic constraints that complicate farming operations and increase administrative burdens.  </p> | <p>Author x and y agreement.</p> <p>Recognition aspect added to social and labor conditions class</p> |

|   |                                                                                                                                                                                                                                                                                                                                                                                                                                                                                                                                                                                                                                                                                                                                                                                                                                                                                                                                                                                                                                                                                                                                                                                                                                                                                                                                                                                                                                                                                                                                                                                                                                                                                                                                                                                                                                                                                                                                                                                                                                                                                                                                                                                                                                                                                                                                                                                                                                                                                                                                                                                                                                                                                                                                                                                                                                                                                                                                                                                                                          |                                                                                                                                                                                                                                                                                                                                                                                                                                                                                                                                                                                                                                                                                                                                                                                                                                                                                                                                                                                                                                                                                                                                                                                                                                                                                                                                                                                                                                                                                                                                                                                                                                                                                                                                                                                                                                                                                                                                                                                                                                                                                                                                                                                                                                                                                                                                                                                                                                                                                                                                                                                                                                                                                                                                                                                                                                                                                                                                                                                                                           |                           |
|---|--------------------------------------------------------------------------------------------------------------------------------------------------------------------------------------------------------------------------------------------------------------------------------------------------------------------------------------------------------------------------------------------------------------------------------------------------------------------------------------------------------------------------------------------------------------------------------------------------------------------------------------------------------------------------------------------------------------------------------------------------------------------------------------------------------------------------------------------------------------------------------------------------------------------------------------------------------------------------------------------------------------------------------------------------------------------------------------------------------------------------------------------------------------------------------------------------------------------------------------------------------------------------------------------------------------------------------------------------------------------------------------------------------------------------------------------------------------------------------------------------------------------------------------------------------------------------------------------------------------------------------------------------------------------------------------------------------------------------------------------------------------------------------------------------------------------------------------------------------------------------------------------------------------------------------------------------------------------------------------------------------------------------------------------------------------------------------------------------------------------------------------------------------------------------------------------------------------------------------------------------------------------------------------------------------------------------------------------------------------------------------------------------------------------------------------------------------------------------------------------------------------------------------------------------------------------------------------------------------------------------------------------------------------------------------------------------------------------------------------------------------------------------------------------------------------------------------------------------------------------------------------------------------------------------------------------------------------------------------------------------------------------------|---------------------------------------------------------------------------------------------------------------------------------------------------------------------------------------------------------------------------------------------------------------------------------------------------------------------------------------------------------------------------------------------------------------------------------------------------------------------------------------------------------------------------------------------------------------------------------------------------------------------------------------------------------------------------------------------------------------------------------------------------------------------------------------------------------------------------------------------------------------------------------------------------------------------------------------------------------------------------------------------------------------------------------------------------------------------------------------------------------------------------------------------------------------------------------------------------------------------------------------------------------------------------------------------------------------------------------------------------------------------------------------------------------------------------------------------------------------------------------------------------------------------------------------------------------------------------------------------------------------------------------------------------------------------------------------------------------------------------------------------------------------------------------------------------------------------------------------------------------------------------------------------------------------------------------------------------------------------------------------------------------------------------------------------------------------------------------------------------------------------------------------------------------------------------------------------------------------------------------------------------------------------------------------------------------------------------------------------------------------------------------------------------------------------------------------------------------------------------------------------------------------------------------------------------------------------------------------------------------------------------------------------------------------------------------------------------------------------------------------------------------------------------------------------------------------------------------------------------------------------------------------------------------------------------------------------------------------------------------------------------------------------------|---------------------------|
|   | <p>  <b>**Bureaucratic Constraints**</b>   Protests against excessive bureaucratic constraints that complicate farming operations and increase administrative burdens.</p> <p>  <b>**Anti-Bureaucracy and Administrative Burden**</b>   Actions highlighting the administrative burden and the need to simplify processes and reduce red tape for more efficient farming operations.</p> <p>  Administrative Burdens and Recognition   Protests highlighting excessive administrative burdens and demanding better recognition and consideration for farmers' work.  </p>                                                                                                                                                                                                                                                                                                                                                                                                                                                                                                                                                                                                                                                                                                                                                                                                                                                                                                                                                                                                                                                                                                                                                                                                                                                                                                                                                                                                                                                                                                                                                                                                                                                                                                                                                                                                                                                                                                                                                                                                                                                                                                                                                                                                                                                                                                                                                                                                                                                | <p>  Bureaucratic Constraints   Demonstrations against excessive bureaucratic burdens related to agricultural processes, state support, and subsidies.  </p> <p>  <b>**Bureaucratic Constraints**</b>   Protests against excessive bureaucracy perceived as hindering agricultural work and state support.  </p>                                                                                                                                                                                                                                                                                                                                                                                                                                                                                                                                                                                                                                                                                                                                                                                                                                                                                                                                                                                                                                                                                                                                                                                                                                                                                                                                                                                                                                                                                                                                                                                                                                                                                                                                                                                                                                                                                                                                                                                                                                                                                                                                                                                                                                                                                                                                                                                                                                                                                                                                                                                                                                                                                                          |                           |
| 6 | <p>  <b>**Import of Low-Quality Goods**</b>   Actions targeting the importation of lower-quality agricultural products, particularly from non-EU countries, which harm domestic markets and consumer trust.</p> <p>  Foreign Imports and Trade Agreements   Protests against the import of agricultural products from foreign countries (e.g., Ukraine), opposition to EU trade agreements deemed harmful to local farmers, and demands for fair competition.  </p> <p>  <b>**Foreign Imports**</b>   Protests against the importation of foreign agricultural products. Particularly the imports from Ukraine, which are viewed as undercutting domestic market prices and generating unfair competition.  </p> <p>  Foreign Imports   Demonstrations against the import of foreign agricultural products, particularly from Ukraine, that are seen as undercutting local farmers' prices.  </p> <p>  <b>**Imports from Ukraine**</b>   Demonstrations against the ongoing import of agricultural products, particularly grains, from Ukraine to the EU, which farmers claim undercuts local prices.  </p> <p>  <b>**Foreign Imports**</b>   Actions against the importation of foreign agricultural products, particularly from countries like Ukraine, which are viewed as undercutting domestic market prices and standards.  </p> <p>  Foreign Imports   Demonstrations against the import of foreign agricultural products, particularly from Ukraine, that are seen as undercutting local farmers' prices.  </p> <p>  <b>**Imports &amp; Fair Prices**</b>   Protests against the import of agricultural products (especially grains from Ukraine) that undercut local prices, with calls for fair production prices.  </p> <p>  <b>**Foreign Imports**</b>   Actions taken against the import of agricultural products from countries outside the EU, such as Ukraine, particularly when these imports are seen as undercutting local market prices.  </p> <p>  Foreign Imports   Demonstrations against the import of foreign agricultural products, particularly from Ukraine, that are seen as undercutting local farmers' prices.  </p> <p>  <b>**Imports &amp; Fair Prices**</b>   Protests addressing unfair foreign competition, particularly grain imports from Ukraine, and related demands for fair production prices and relief measures.  </p> <p>  <b>**Foreign Imports**</b>   Actions taken against the import of agricultural products from countries outside the EU, such as Ukraine, particularly when these imports are seen as undercutting local market prices.</p> <p>  Foreign Imports   Demonstrations against the import of foreign agricultural products, particularly from Ukraine, that are seen as undercutting local farmers' prices.  </p> <p>  <b>**Import of Foreign Agricultural Products**</b>   Protests against the import of cheaper foreign agricultural products, especially from Ukraine, which are perceived to undermine local agricultural markets and prices.  </p> | <p>  <b>**Foreign Imports**</b>   Protests against the importation of foreign agricultural products. Particularly the imports from Ukraine, which are viewed as undercutting domestic market prices and generating unfair competition.  </p> <p>  Foreign Imports   Demonstrations against the import of foreign agricultural products, particularly from Ukraine, that are seen as undercutting local farmers' prices.  </p> <p>  <b>**Imports from Ukraine**</b>   Demonstrations against the ongoing import of agricultural products, particularly grains, from Ukraine to the EU, which farmers claim undercuts local prices.  </p> <p>  <b>**Foreign Imports**</b>   Actions against the importation of foreign agricultural products, particularly from countries like Ukraine, which are viewed as undercutting domestic market prices and standards.</p> <p>  <b>**Counteracting Unfair Competition**</b>   Protest movements highlighting competition from foreign farmers and products that are viewed as being sold at unfairly low prices, thus harming domestic agricultural markets.  </p> <p>  Foreign Imports   Demonstrations against the import of foreign agricultural products, particularly from Ukraine, that are seen as undercutting local farmers' prices.  </p> <p>  <b>**Imports &amp; Fair Prices**</b>   Protests against the import of agricultural products (especially grains from Ukraine) that undercut local prices, with calls for fair production prices.  </p> <p>  <b>**Foreign Imports**</b>   Actions taken against the import of agricultural products from countries outside the EU, such as Ukraine, particularly when these imports are seen as undercutting local market prices.  </p> <p>  Foreign Imports   Demonstrations against the import of foreign agricultural products, particularly from Ukraine, that are seen as undercutting local farmers' prices.  </p> <p>  <b>**Imports &amp; Fair Prices**</b>   Protests addressing unfair foreign competition, particularly grain imports from Ukraine, and related demands for fair production prices and relief measures.  </p> <p>  <b>**Foreign Imports**</b>   Actions taken against the import of agricultural products from countries outside the EU, such as Ukraine, particularly when these imports are seen as undercutting local market prices.</p> <p>  <b>**Import of Low-Quality Goods**</b>   Actions targeting the importation of lower-quality agricultural products, particularly from non-EU countries, which harm domestic markets and consumer trust.  </p> <p>  Foreign Imports   Demonstrations against the import of foreign agricultural products, particularly from Ukraine, that are seen as undercutting local farmers' prices.  </p> <p>  Foreign Imports and Trade Agreements   Protests against the import of agricultural products from foreign countries (e.g., Ukraine), opposition to EU trade agreements deemed harmful to local farmers, and demands for fair competition.  </p> | Author x and y agreement. |

|   |                                                                                                                                                                                                                                                                                                                                                                                                                                                                                                                                                                                                                                                                                                                                                                                                                                                                                                                                                                                                                                                                                                                                                                                                                                                                                                                                                                                                                                                                                                                                                                                                                                                                                                                                                                                                                                                                                                                                                                                                                                                                                                                                                                                                                                                                                                                                                                                                                                                                                                                                                                                                                                                                                                                                                                                                                                                                                                                                                                                          |                                                                                                                                                                                                                                                                                                                                                                                                                                                                                                                                                                                                                                                                                                                                                                                                                                                                                                                                                                                                                                                                                                                                                                                                                                                                                                                                                                                                                                                                                                                                                                                                                                                                                                                                                                                                                                                                                                                                                                                                                                                                                                                                                                                                                                                                                                                                                                                                                                                                                                                                                                                                                                                                                                                                              |                           |
|---|------------------------------------------------------------------------------------------------------------------------------------------------------------------------------------------------------------------------------------------------------------------------------------------------------------------------------------------------------------------------------------------------------------------------------------------------------------------------------------------------------------------------------------------------------------------------------------------------------------------------------------------------------------------------------------------------------------------------------------------------------------------------------------------------------------------------------------------------------------------------------------------------------------------------------------------------------------------------------------------------------------------------------------------------------------------------------------------------------------------------------------------------------------------------------------------------------------------------------------------------------------------------------------------------------------------------------------------------------------------------------------------------------------------------------------------------------------------------------------------------------------------------------------------------------------------------------------------------------------------------------------------------------------------------------------------------------------------------------------------------------------------------------------------------------------------------------------------------------------------------------------------------------------------------------------------------------------------------------------------------------------------------------------------------------------------------------------------------------------------------------------------------------------------------------------------------------------------------------------------------------------------------------------------------------------------------------------------------------------------------------------------------------------------------------------------------------------------------------------------------------------------------------------------------------------------------------------------------------------------------------------------------------------------------------------------------------------------------------------------------------------------------------------------------------------------------------------------------------------------------------------------------------------------------------------------------------------------------------------------|----------------------------------------------------------------------------------------------------------------------------------------------------------------------------------------------------------------------------------------------------------------------------------------------------------------------------------------------------------------------------------------------------------------------------------------------------------------------------------------------------------------------------------------------------------------------------------------------------------------------------------------------------------------------------------------------------------------------------------------------------------------------------------------------------------------------------------------------------------------------------------------------------------------------------------------------------------------------------------------------------------------------------------------------------------------------------------------------------------------------------------------------------------------------------------------------------------------------------------------------------------------------------------------------------------------------------------------------------------------------------------------------------------------------------------------------------------------------------------------------------------------------------------------------------------------------------------------------------------------------------------------------------------------------------------------------------------------------------------------------------------------------------------------------------------------------------------------------------------------------------------------------------------------------------------------------------------------------------------------------------------------------------------------------------------------------------------------------------------------------------------------------------------------------------------------------------------------------------------------------------------------------------------------------------------------------------------------------------------------------------------------------------------------------------------------------------------------------------------------------------------------------------------------------------------------------------------------------------------------------------------------------------------------------------------------------------------------------------------------------|---------------------------|
|   | <p>  Foreign Imports   Demonstrations against the import of foreign agricultural products, particularly from Ukraine, that are seen as undercutting local farmers' prices.  </p> <p>  <b>**Imports &amp; Fair Prices**</b>   Protests against the import of agricultural products (especially grains from Ukraine) that undercut local prices, with calls for fair production prices.  </p>                                                                                                                                                                                                                                                                                                                                                                                                                                                                                                                                                                                                                                                                                                                                                                                                                                                                                                                                                                                                                                                                                                                                                                                                                                                                                                                                                                                                                                                                                                                                                                                                                                                                                                                                                                                                                                                                                                                                                                                                                                                                                                                                                                                                                                                                                                                                                                                                                                                                                                                                                                                              | <p>  <b>**Import of Foreign Agricultural Products**</b>   Protests against the import of cheaper foreign agricultural products, especially from Ukraine, which are perceived to undermine local agricultural markets and prices.  </p> <p>  Foreign Imports   Demonstrations against the import of foreign agricultural products, particularly from Ukraine, that are seen as undercutting local farmers' prices.  </p> <p>  <b>**Imports &amp; Fair Prices**</b>   Protests against the import of agricultural products (especially grains from Ukraine) that undercut local prices, with calls for fair production prices.  </p>                                                                                                                                                                                                                                                                                                                                                                                                                                                                                                                                                                                                                                                                                                                                                                                                                                                                                                                                                                                                                                                                                                                                                                                                                                                                                                                                                                                                                                                                                                                                                                                                                                                                                                                                                                                                                                                                                                                                                                                                                                                                                                           |                           |
| 7 | <p>  <b>**Subsidy Cuts**</b>   Protests against national governments' plans to cut subsidies and tax exemptions for the agricultural sector, including agricultural diesel subsidies.  </p> <p>  Agricultural Subsidies   Protests concerning the cut or delayed distribution of agricultural subsidies, including Agrardiesel and vehicle tax exemptions.  </p> <p>  <b>**Subsidy Cuts**</b>   Protests where farmers oppose government plans to cut agricultural sector subsidies.  </p> <p>  <b>**Subsidy Cuts**</b>   Demonstrations against governmental plans to cut subsidies for the agricultural sector, especially related to agricultural diesel (Agrardiesel) and vehicle tax exemptions.  </p> <p>  Agricultural Subsidies   Protests concerning the cut or delayed distribution of agricultural subsidies, including Agrardiesel and vehicle tax exemptions.  </p> <p>  <b>**Subsidy Cuts**</b>   Protests where farmers oppose government plans to cut agricultural sector subsidies.  </p> <p>  <b>**Agricultural Subsidy Cuts**</b>   Demonstrations against the planned cuts to subsidies for agricultural sectors, including fuel tax exemptions and other financial aids essential for farm operations.  </p> <p>  Agricultural Subsidies   Protests concerning the cut or delayed distribution of agricultural subsidies, including Agrardiesel and vehicle tax exemptions.  </p> <p>  <b>**Subsidy Cuts**</b>   Protests where farmers oppose government plans to cut agricultural sector subsidies.  </p> <p>  <b>**Agricultural Subsidy Cuts**</b>   Demonstrations against the planned cuts to subsidies for agricultural sectors, including fuel tax exemptions and other financial aids essential for farm operations.  </p> <p>  Agricultural Subsidies   Protests concerning the cut or delayed distribution of agricultural subsidies, including Agrardiesel and vehicle tax exemptions.  </p> <p>  Low State Support and Subsidies   Protests where farmers demand increased financial support from national governments or object to cuts in agricultural sector subsidies.  </p> <p>  <b>**Economic Support and Subsidies**</b>   Demands for higher institutional and financial support from national governments to offset economic difficulties resulting from inadequate subsidies and budget cuts.  </p> <p>  Agricultural Subsidies   Protests concerning the cut or delayed distribution of agricultural subsidies, including Agrardiesel and vehicle tax exemptions.  </p> <p>  <b>**Subsidy Cuts**</b>   Protests where farmers oppose government plans to cut agricultural sector subsidies.  </p> <p>  Taxation and Fuel Subsidies   Protests against the proposed reduction or removal of tax bonuses for agricultural fuel, vehicle tax exemptions, and increased CO2 levies.  </p> <p>  <b>**Tax Policies**</b>   Protests against the reduction or removal of tax exemptions and subsidies on agricultural fuel and vehicle taxes.  </p> | <p>  <b>**Subsidy Cuts**</b>   Protests against national governments' plans to cut subsidies and tax exemptions for the agricultural sector, including agricultural diesel subsidies.  </p> <p>  Agricultural Subsidies   Protests concerning the cut or delayed distribution of agricultural subsidies, including Agrardiesel and vehicle tax exemptions.  </p> <p>  <b>**Subsidy Cuts**</b>   Protests where farmers oppose government plans to cut agricultural sector subsidies.  </p> <p>  <b>**Subsidy Cuts**</b>   Demonstrations against governmental plans to cut subsidies for the agricultural sector, especially related to agricultural diesel (Agrardiesel) and vehicle tax exemptions.  </p> <p>  <b>**Tax Policies**</b>   Protests against the reduction or removal of tax exemptions and subsidies on agricultural fuel and vehicle taxes.  </p> <p>  Agricultural Subsidies   Protests concerning the cut or delayed distribution of agricultural subsidies, including Agrardiesel and vehicle tax exemptions.  </p> <p>  <b>**Subsidy Cuts**</b>   Protests where farmers oppose government plans to cut agricultural sector subsidies.  </p> <p>  <b>**Agricultural Subsidy Cuts**</b>   Demonstrations against the planned cuts to subsidies for agricultural sectors, including fuel tax exemptions and other financial aids essential for farm operations.  </p> <p>  Agricultural Subsidies   Protests concerning the cut or delayed distribution of agricultural subsidies, including Agrardiesel and vehicle tax exemptions.  </p> <p>  <b>**Subsidy Cuts**</b>   Protests where farmers oppose government plans to cut agricultural sector subsidies.  </p> <p>  <b>**Agricultural Subsidy Cuts**</b>   Demonstrations against the planned cuts to subsidies for agricultural sectors, including fuel tax exemptions and other financial aids essential for farm operations.  </p> <p>  Agricultural Subsidies   Protests concerning the cut or delayed distribution of agricultural subsidies, including Agrardiesel and vehicle tax exemptions.  </p> <p>  Taxation and Fuel Subsidies   Protests against the proposed reduction or removal of tax bonuses for agricultural fuel, vehicle tax exemptions, and increased CO2 levies.  </p> <p>  Agricultural Subsidies   Protests concerning the cut or delayed distribution of agricultural subsidies, including Agrardiesel and vehicle tax exemptions.  </p> <p>  EU Agricultural Policies   Protests targeting overall EU agricultural standards and policies, particularly the ratification of EU's free-trade agreements.  </p> <p>  <b>**Subsidy Cuts**</b>   Protests where farmers oppose government plans to cut agricultural sector subsidies.  </p> | Author x and y agreement. |

|    |                                                                                                                                                                                                                                                                                                                                                                                                                                                                                                                                                                                                                                                                                                                                                                                                                                                                                                                                                                                                                                                                                                                                                                                                                                                                                                                                                                                                                                                                                                                                                                                                                                                                                                                                                                                                                                                                                                                                                                                                                                                                                                                                                                                                                                                                                                                                         |                                                                                                                                                                                                                                                                                                                                                                                                                                                                                                                                                                                                                                                                                                                                                                                                                                                                                                                                                                                                                                                                                                                                                                                                                                                                                                                                                                                                                                                                                                                                                                                                 |                                                                                                                                               |
|----|-----------------------------------------------------------------------------------------------------------------------------------------------------------------------------------------------------------------------------------------------------------------------------------------------------------------------------------------------------------------------------------------------------------------------------------------------------------------------------------------------------------------------------------------------------------------------------------------------------------------------------------------------------------------------------------------------------------------------------------------------------------------------------------------------------------------------------------------------------------------------------------------------------------------------------------------------------------------------------------------------------------------------------------------------------------------------------------------------------------------------------------------------------------------------------------------------------------------------------------------------------------------------------------------------------------------------------------------------------------------------------------------------------------------------------------------------------------------------------------------------------------------------------------------------------------------------------------------------------------------------------------------------------------------------------------------------------------------------------------------------------------------------------------------------------------------------------------------------------------------------------------------------------------------------------------------------------------------------------------------------------------------------------------------------------------------------------------------------------------------------------------------------------------------------------------------------------------------------------------------------------------------------------------------------------------------------------------------|-------------------------------------------------------------------------------------------------------------------------------------------------------------------------------------------------------------------------------------------------------------------------------------------------------------------------------------------------------------------------------------------------------------------------------------------------------------------------------------------------------------------------------------------------------------------------------------------------------------------------------------------------------------------------------------------------------------------------------------------------------------------------------------------------------------------------------------------------------------------------------------------------------------------------------------------------------------------------------------------------------------------------------------------------------------------------------------------------------------------------------------------------------------------------------------------------------------------------------------------------------------------------------------------------------------------------------------------------------------------------------------------------------------------------------------------------------------------------------------------------------------------------------------------------------------------------------------------------|-----------------------------------------------------------------------------------------------------------------------------------------------|
| 8  | <p>  EU Agricultural Policies   Protests targeting overall EU agricultural standards and policies, particularly the ratification of EU's free-trade agreements.  </p> <p>  **EU Agricultural Policies**   Protests against various agricultural policies set by the European Union, including the Green Deal, and Common Agricultural Policy.  </p> <p>  EU Agricultural Policies   Protests targeting overall EU agricultural standards and policies, particularly the ratification of EU's free-trade agreements.  </p> <p>  EU Agricultural Policies   Protests targeting overall EU agricultural standards and policies, particularly the ratification of EU's free-trade agreements.  </p> <p>  EU Agricultural Policies   Protests targeting overall EU agricultural standards and policies, particularly the ratification of EU's free-trade agreements.  </p> <p>  EU Agricultural Policies   Protests targeting overall EU agricultural standards and policies, particularly the ratification of EU's free-trade agreements.  </p>                                                                                                                                                                                                                                                                                                                                                                                                                                                                                                                                                                                                                                                                                                                                                                                                                                                                                                                                                                                                                                                                                                                                                                                                                                                                                             |                                                                                                                                                                                                                                                                                                                                                                                                                                                                                                                                                                                                                                                                                                                                                                                                                                                                                                                                                                                                                                                                                                                                                                                                                                                                                                                                                                                                                                                                                                                                                                                                 | 8 will not be used as own category because it does not contain any extra information on top of categories 1 and 2.                            |
| 9  | <p>  **Call for State Support**   Broad demands for increased state or financial support for national agriculture.  </p> <p>  **National Agricultural Policies**   Protests targeting specific national agricultural policies, including taxation on agricultural diesel, road tolls, and vehicle tax exemptions.  </p> <p>  Specific National Regulations   Demonstrations targeting specific national policies, such as nitrogen policies or proposed tax increases on non-road diesel.  </p> <p>  **Food Security and Domestic Agricultural Support**   Actions taken to prioritize the security of domestic food production and demand higher institutional and financial support from national governments.  </p> <p>  **Government Support**   Demands for increased state support and subsidies to the agriculture sector.  </p> <p>  **Fair Prices and Compensation**   Protests demanding fair production prices, compensation from large retailers, and higher financial support/pay increases for farmers, including for specific produce like milk and bananas.  </p> <p>  **Low State Support**   Protests against what farmers perceive as inadequate state support and financial aid from national governments.  </p> <p>  **Fair Compensation**   Protests demanding better compensation for their products from large retailers and fair production prices for agricultural goods.  </p> <p>  **Support for National Agriculture**   Protests demanding higher institutional and financial support for national agriculture, citing low state support and bureaucratic constraints.  </p> <p>  **Support &amp; Financial Assistance**   Demonstrations demanding higher state support and prompt payment of subsidies for the agricultural sector.  </p> <p>  Economic Difficulties   Protests highlighting the economic struggles faced by farmers, including demands for state and institutional financial support.  </p> <p>  Compensation and Insurance   Protests demanding better compensation payments, reduced insurance fees, and improved insurance and working capital programs.  </p> <p>  **National Agricultural Policies**   Demonstrations against national government policies on agriculture, including those affecting tax regulations, subsidies, and overall agricultural policy direction.  </p> | <p>  **Local Agricultural Policies**   Demonstrations against national policies specific to local agricultural practices, such as nitrogen policies and land use regulations.  </p> <p>  **National Agricultural Policies**   Demonstrations against national government policies on agriculture, including those affecting tax regulations, subsidies, and overall agricultural policy direction.  </p> <p>  Local Environmental and Infrastructure Concerns   Protests against local projects seen as damaging to biodiversity, agriculture, and local economic conditions.  </p> <p>  Specific National Regulations   Demonstrations targeting specific national policies, such as nitrogen policies or proposed tax increases on non-road diesel.  </p> <p>  **National Agricultural Policies**   Protests targeting specific national agricultural policies, including taxation on agricultural diesel, road tolls, and vehicle tax exemptions.  </p> <p>  Agriculture and Livestock Policies   Protests directed against specific agricultural and livestock policies set by national or EU authorities that are seen as detrimental to farmers' livelihoods.  </p> <p>  **Governmental Agricultural Policies**   Broader opposition to national and regional government policies perceived as detrimental to the agricultural sector, including tax policies and subsidy cuts.  </p> <p>  **Political and Administrative Demands**   Demands for direct dialogue with authorities, changes in domestic policies, and more government oversight and support for agricultural sectors.</p> | 9 and 10 relate to domestic and local policies and support. Separation not clear right away. Therefore 9 and 10 are combined to one category. |
| 10 | <p>  **Local Agricultural Policies**   Demonstrations against national policies specific to local agricultural practices, such as nitrogen policies and land use regulations.  </p> <p>  **National Agricultural Policies**   Demonstrations against national government policies on agriculture, including those affecting tax regulations, subsidies, and overall agricultural policy direction.  </p>                                                                                                                                                                                                                                                                                                                                                                                                                                                                                                                                                                                                                                                                                                                                                                                                                                                                                                                                                                                                                                                                                                                                                                                                                                                                                                                                                                                                                                                                                                                                                                                                                                                                                                                                                                                                                                                                                                                                |                                                                                                                                                                                                                                                                                                                                                                                                                                                                                                                                                                                                                                                                                                                                                                                                                                                                                                                                                                                                                                                                                                                                                                                                                                                                                                                                                                                                                                                                                                                                                                                                 |                                                                                                                                               |

|    |                                                                                                                                                                                                                                                                                                                                                                                                                                                                                                                                                                                                                                                                                                                                                                                                                                                                                                                                                                                                                                                                                                                                                                                                                                                                                                                                                                                                                                                                                                                                                                                                                                                                                                                                                                                                                                                                                                                                                                 |                                                                                                                                                                                                                                                                                                                                                                                                                                                                                                                                                                                                                                                                                                                                                                                                                                                                                                                                                                                                                                                                                                                                                                                                                                                                                                                                                                                                                                                                                                                                                                                                                                                                                                                                                                                                                                                                                                                                                                                                                                                                                                                                                  |                           |
|----|-----------------------------------------------------------------------------------------------------------------------------------------------------------------------------------------------------------------------------------------------------------------------------------------------------------------------------------------------------------------------------------------------------------------------------------------------------------------------------------------------------------------------------------------------------------------------------------------------------------------------------------------------------------------------------------------------------------------------------------------------------------------------------------------------------------------------------------------------------------------------------------------------------------------------------------------------------------------------------------------------------------------------------------------------------------------------------------------------------------------------------------------------------------------------------------------------------------------------------------------------------------------------------------------------------------------------------------------------------------------------------------------------------------------------------------------------------------------------------------------------------------------------------------------------------------------------------------------------------------------------------------------------------------------------------------------------------------------------------------------------------------------------------------------------------------------------------------------------------------------------------------------------------------------------------------------------------------------|--------------------------------------------------------------------------------------------------------------------------------------------------------------------------------------------------------------------------------------------------------------------------------------------------------------------------------------------------------------------------------------------------------------------------------------------------------------------------------------------------------------------------------------------------------------------------------------------------------------------------------------------------------------------------------------------------------------------------------------------------------------------------------------------------------------------------------------------------------------------------------------------------------------------------------------------------------------------------------------------------------------------------------------------------------------------------------------------------------------------------------------------------------------------------------------------------------------------------------------------------------------------------------------------------------------------------------------------------------------------------------------------------------------------------------------------------------------------------------------------------------------------------------------------------------------------------------------------------------------------------------------------------------------------------------------------------------------------------------------------------------------------------------------------------------------------------------------------------------------------------------------------------------------------------------------------------------------------------------------------------------------------------------------------------------------------------------------------------------------------------------------------------|---------------------------|
|    | <p>  <b>**Governmental Agricultural Policies**</b>   Broader opposition to national and regional government policies perceived as detrimental to the agricultural sector, including tax policies and subsidy cuts.</p> <p>  <b>**Food Security and Domestic Agricultural Support**</b>   Actions taken to prioritize the security of domestic food production and demand higher institutional and financial support from national governments.</p>                                                                                                                                                                                                                                                                                                                                                                                                                                                                                                                                                                                                                                                                                                                                                                                                                                                                                                                                                                                                                                                                                                                                                                                                                                                                                                                                                                                                                                                                                                              |                                                                                                                                                                                                                                                                                                                                                                                                                                                                                                                                                                                                                                                                                                                                                                                                                                                                                                                                                                                                                                                                                                                                                                                                                                                                                                                                                                                                                                                                                                                                                                                                                                                                                                                                                                                                                                                                                                                                                                                                                                                                                                                                                  |                           |
| 11 | <p>  <b>**Natural Disasters and Climate Conditions**</b>   Demonstrations calling for relief measures to offset the consequences of droughts, floods, and other climatic impacts affecting agricultural production.</p> <p>  Natural Disasters   Movements demanding immediate compensation and relief measures following natural disasters such as droughts and floods.  </p> <p>  <b>**Climate Change &amp; Natural Disasters**</b>   Demands for relief measures to address the consequences of droughts, floods, and other climate-related impacts on agriculture.  </p> <p>  <b>**Droughts and Natural Disasters**</b>   Protests demanding relief measures to offset the consequences of droughts, floods, and natural disasters that severely impact agricultural output.  </p> <p>  <b>**Drought and Environmental Relief Measures**</b>   Mobilizations demanding specific measures to mitigate the effects of droughts and environmental challenges on agriculture, including financial compensations and support for sustainable practices.  </p> <p>  <b>**Drought and Environmental Relief Measures**</b>   Mobilizations demanding specific measures to mitigate the effects of droughts and environmental challenges on agriculture, including financial compensations and support for sustainable practices.  </p> <p>  Drought and Natural Disaster Relief   Protests demanding relief measures and support to offset the consequences of droughts, storms, and other natural disasters affecting the agricultural sector.  </p> <p>  <b>**Drought and Climate Impact Relief**</b>   Calls for relief measures to offset the adverse consequences of droughts and climate impacts on agriculture.</p> <p> </p> <p>  <b>**Support for Natural Disasters and Compensation**</b>   Protests demanding adequate compensation and support for farmers affected by natural disasters such as droughts, floods, and other climate-related events.</p> | <p>  <b>**Natural Disasters and Climate Conditions**</b>   Demonstrations calling for relief measures to offset the consequences of droughts, floods, and other climatic impacts affecting agricultural production.</p> <p>  Natural Disasters   Movements demanding immediate compensation and relief measures following natural disasters such as droughts and floods.  </p> <p>  <b>**Climate Change &amp; Natural Disasters**</b>   Demands for relief measures to address the consequences of droughts, floods, and other climate-related impacts on agriculture.  </p> <p>  <b>**Droughts and Natural Disasters**</b>   Protests demanding relief measures to offset the consequences of droughts, floods, and natural disasters that severely impact agricultural output.  </p> <p>  <b>**Specific Regional Issues**</b>   Localized issues like drought relief measures, compensation for natural disasters, and region-specific agricultural policies.  </p> <p>  <b>**Drought and Environmental Relief Measures**</b>   Mobilizations demanding specific measures to mitigate the effects of droughts and environmental challenges on agriculture, including financial compensations and support for sustainable practices.  </p> <p>  <b>**Drought and Environmental Relief Measures**</b>   Mobilizations demanding specific measures to mitigate the effects of droughts and environmental challenges on agriculture, including financial compensations and support for sustainable practices.  </p> <p>  <b>**Support for Natural Disasters and Compensation**</b>   Protests demanding adequate compensation and support for farmers affected by natural disasters such as droughts, floods, and other climate-related events.  </p> <p>  Drought and Natural Disaster Relief   Protests demanding relief measures and support to offset the consequences of droughts, storms, and other natural disasters affecting the agricultural sector.  </p> <p>  <b>**Drought and Climate Impact Relief**</b>   Calls for relief measures to offset the adverse consequences of droughts and climate impacts on agriculture.</p> <p> </p> | Author x and y agreement. |
| 12 | <p>  <b>**Social and Labor Conditions**</b>   Calls for better working and social conditions within the agricultural sector.  </p> <p>  <b>**Social and Working Conditions**</b>   Protests aiming to improve the working and social conditions within the agricultural sector, including demands for better contracts and employment terms.  </p> <p>  Labor and Social Conditions   Movements advocating for better working and social conditions for farmers, including fairer pay and support measures.  </p> <p>  <b>**Working Conditions &amp; Social Benefits**</b>   Demonstrations calling for better working and social conditions in the agricultural sector, including dispute over working hours and compensation.  </p> <p>  Labor and Social Conditions   Movements advocating for better working and social conditions for farmers, including fairer pay and support measures.  </p> <p>  <b>**Working and Social Conditions**</b>   Protests aiming to improve the general working conditions in the farming sector, including issues related to health, safety, and financial security for farm workers and operators.  </p> <p>  <b>**Social and Labor Conditions**</b>   Calls for better working and social conditions within the agricultural sector.  </p>                                                                                                                                                                                                                                                                                                                                                                                                                                                                                                                                                                                                                                                                               | <p>  <b>**Labor Conditions**</b>   Protests seeking better working and social conditions for farmworkers, including demands for improved labor rights and safety standards.</p> <p>  Labor and Social Conditions   Movements advocating for better working and social conditions for farmers, including fairer pay and support measures during crises such as droughts.  </p> <p>  <b>**Social &amp; Working Conditions**</b>   Calls for improved working conditions, social security benefits, and overall welfare in the agricultural sector.  </p> <p>  <b>**Working Conditions and Social Issues**</b>   Protests addressing poor working and social conditions within the farming sector, advocating for improvements in labor conditions and social benefits.  </p> <p>  <b>**Employment and Training Issues**</b>   Protests focusing on the employment aspects of the agricultural sector, including demands for better training programs and job security for agricultural workers.  </p> <p>  Labor and Social Conditions   Movements advocating for better working and social conditions for farmers, including fairer pay and support measures during crises such as droughts.  </p>                                                                                                                                                                                                                                                                                                                                                                                                                                                                                                                                                                                                                                                                                                                                                                                                                                                                                                                                                | Author x and y agreement. |



|    |                                                                                                                                                                                                                                                                                                                                                                                                                                                                                                                                                                                                                                                                                                                                                                                                                                                                                                                                                                                                                                                                                                                                                                                                                                                                                                                                                                                                                                                                                                                                                                                                                                                                                                                                                                                                                            |                                                                                                                                                                                                                                                                                                                                                                                                                                                                                                                                                                                                                                                                                                                                                                                                                                                                                                                                                                                                                                                                                                                                                                                                                                                                                                                                                                                                                                                                                                                                                                                                                                                                                                                                                                                                                                                                                           |                                                                                                 |
|----|----------------------------------------------------------------------------------------------------------------------------------------------------------------------------------------------------------------------------------------------------------------------------------------------------------------------------------------------------------------------------------------------------------------------------------------------------------------------------------------------------------------------------------------------------------------------------------------------------------------------------------------------------------------------------------------------------------------------------------------------------------------------------------------------------------------------------------------------------------------------------------------------------------------------------------------------------------------------------------------------------------------------------------------------------------------------------------------------------------------------------------------------------------------------------------------------------------------------------------------------------------------------------------------------------------------------------------------------------------------------------------------------------------------------------------------------------------------------------------------------------------------------------------------------------------------------------------------------------------------------------------------------------------------------------------------------------------------------------------------------------------------------------------------------------------------------------|-------------------------------------------------------------------------------------------------------------------------------------------------------------------------------------------------------------------------------------------------------------------------------------------------------------------------------------------------------------------------------------------------------------------------------------------------------------------------------------------------------------------------------------------------------------------------------------------------------------------------------------------------------------------------------------------------------------------------------------------------------------------------------------------------------------------------------------------------------------------------------------------------------------------------------------------------------------------------------------------------------------------------------------------------------------------------------------------------------------------------------------------------------------------------------------------------------------------------------------------------------------------------------------------------------------------------------------------------------------------------------------------------------------------------------------------------------------------------------------------------------------------------------------------------------------------------------------------------------------------------------------------------------------------------------------------------------------------------------------------------------------------------------------------------------------------------------------------------------------------------------------------|-------------------------------------------------------------------------------------------------|
|    | <p>  Labor and Social Conditions   Movements advocating for better working and social conditions for farmers, including fairer pay and support measures during crises such as droughts.  </p> <p>  <b>**Working Conditions and Social Issues**</b>   Protests addressing poor working and social conditions within the farming sector, advocating for improvements in labor conditions and social benefits.  </p> <p>  <b>**Social &amp; Working Conditions**</b>   Calls for improved working conditions, social security benefits, and overall welfare in the agricultural sector.  </p> <p>  Labor and Social Conditions   Movements advocating for better working and social conditions for farmers, including fairer pay and support measures during crises such as droughts.  </p> <p>  <b>**Labor Conditions**</b>   Protests seeking better working and social conditions for farmworkers, including demands for improved labor rights and safety standards.  </p> <p>  <b>**Economic Struggles and Livelihoods**</b>   Demonstrations driven by broader economic challenges in the agricultural sector, advocating for the survival of farms and better working conditions for agricultural workers.  </p> <p>  <b>**Working and Social Conditions**</b>   Protests aiming to improve the general working conditions in the farming sector, including issues related to health, safety, and financial security for farm workers and operators.  </p> <p>  Labor and Social Conditions   Movements advocating for better working and social conditions for farmers, including fairer pay and support measures.  </p>                                                                                                                                                                                               | <p>  <b>**Social and Labor Conditions**</b>   Calls for better working and social conditions within the agricultural sector.  </p> <p>  <b>**Working and Social Conditions**</b>   Protests aiming to improve the general working conditions in the farming sector, including issues related to health, safety, and financial security for farm workers and operators.  </p> <p>  Labor and Social Conditions   Movements advocating for better working and social conditions for farmers, including fairer pay and support measures.  </p> <p>  <b>**Working Conditions &amp; Social Benefits**</b>   Demonstrations calling for better working and social conditions in the agricultural sector, including dispute over working hours and compensation.  </p> <p>  <b>**Working and Social Conditions**</b>   Protests aiming to improve the general working conditions in the farming sector, including issues related to health, safety, and financial security for farm workers and operators.  </p> <p>  Labor and Social Conditions   Movements advocating for better working and social conditions for farmers, including fairer pay and support measures.  </p> <p>  Working Conditions and Social Support   Protests seeking improvements in working conditions, social support for farmers, and better terms of livelihood in the agricultural sector.  </p> <p>  <b>**Social and Working Conditions**</b>   Protests aiming to improve the working and social conditions within the agricultural sector, including demands for better contracts and employment terms.  </p> <p>  Labor and Social Conditions   Movements advocating for better working and social conditions for farmers, including fairer pay and support measures.  </p> <p>  <b>**Social and Labor Conditions**</b>   Calls for better working and social conditions within the agricultural sector.  </p> |                                                                                                 |
| 15 | <p>  <b>**Economic Solidarity**</b>   Protests showcasing solidarity with truck drivers and other affected sectors, focusing on shared economic and regulatory burdens.  </p> <p>  Solidarity Movements   Protests showing solidarity with other European or national farmer movements on similar issues.  </p> <p>  <b>**Solidarity with Broader Social Movements**</b>   Displays of solidarity with broader social issues beyond farming, including anti-racism, immigrant rights, and other socio-political movements.  </p> <p>  Solidarity and Representation   Protests in support of or in solidarity with other farmers, national or EU-wide, addressing a plethora of issues ranging from regulation to economic pressures.  </p> <p>  <b>**Social Movements and Solidarity Protests**</b>   Protests led by or supported by farmers standing in solidarity with other social issues, including anti-immigration bills, environmental conservation, and broader socio-economic grievances.  </p> <p>  Social Equality Movements   Movements by farmers also addressing broader social issues, such as fighting far-right extremism or anti-immigration laws.  </p> <p>  Solidarity Actions   Actions in support of broader social or political causes relevant to the farmer's livelihoods, including protests against xenophobic and racist immigration laws.  </p> <p>  <b>**Farmers' Rights &amp; Public Solidarity**</b>   General demonstrations advocating for farmers' recognition, better consultation on policies, and solidarity actions across different labor and trade groups.  </p> <p>  Solidarity Movements   Demonstrations showing solidarity with farmers from other EU countries or protesting about broader social issues such as right-wing extremism or specific national policies.  </p> | <p>  <b>**Economic Solidarity**</b>   Protests showcasing solidarity with truck drivers and other affected sectors, focusing on shared economic and regulatory burdens.  </p> <p>  <b>**Solidarity with Broader Social Movements**</b>   Displays of solidarity with broader social issues beyond farming, including anti-racism, immigrant rights, and other socio-political movements.  </p> <p>  Social Equality Movements   Movements by farmers also addressing broader social issues, such as fighting far-right extremism or anti-immigration laws.  </p> <p>  <b>**Social Movements and Solidarity Protests**</b>   Protests led by or supported by farmers standing in solidarity with other social issues, including anti-immigration bills, environmental conservation, and broader socio-economic grievances.  </p> <p>  Solidarity Actions   Actions in support of broader social or political causes relevant to the farmer's livelihoods, including protests against xenophobic and racist immigration laws.  </p> <p>  Solidarity Movements   Protests showing solidarity with other European or national farmer movements on similar issues.  </p> <p>  Solidarity and Representation   Protests in support of or in solidarity with other farmers, national or EU-wide, addressing a plethora of issues ranging from regulation to economic pressures.  </p> <p>  <b>**Farmers' Rights &amp; Public Solidarity**</b>   General demonstrations advocating for farmers' recognition, better consultation on policies, and solidarity actions across different labor and trade groups.  </p> <p>  Solidarity Movements   Demonstrations showing solidarity with farmers from other EU countries or protesting about broader social issues such as right-wing extremism or specific national policies.  </p>                                                                | <p>Author x and y agreement.</p> <p>Recognition aspect added to social and labor conditions</p> |

|    |                                                                                                                                                                                                                                                                                                                                                                                                                                                                                                                                                                                                                                                                                                                                                                                                                                                                                                                    |                                                                                                                                                                                                                                                                                                                                                                                                                                                                                                                                                                                                                                                                                                                                                                                                                                                                                                                                                                                                                                                                                                                                                                                                                                                                                                                                |                                                                                                 |
|----|--------------------------------------------------------------------------------------------------------------------------------------------------------------------------------------------------------------------------------------------------------------------------------------------------------------------------------------------------------------------------------------------------------------------------------------------------------------------------------------------------------------------------------------------------------------------------------------------------------------------------------------------------------------------------------------------------------------------------------------------------------------------------------------------------------------------------------------------------------------------------------------------------------------------|--------------------------------------------------------------------------------------------------------------------------------------------------------------------------------------------------------------------------------------------------------------------------------------------------------------------------------------------------------------------------------------------------------------------------------------------------------------------------------------------------------------------------------------------------------------------------------------------------------------------------------------------------------------------------------------------------------------------------------------------------------------------------------------------------------------------------------------------------------------------------------------------------------------------------------------------------------------------------------------------------------------------------------------------------------------------------------------------------------------------------------------------------------------------------------------------------------------------------------------------------------------------------------------------------------------------------------|-------------------------------------------------------------------------------------------------|
|    | <p>  <b>**Support for Other Agricultural Sectors**</b>   Demonstrations including support for related sectors such as beekeeping, livestock breeding, and fisheries, reflecting solidarity within the broader agricultural industry.  </p>                                                                                                                                                                                                                                                                                                                                                                                                                                                                                                                                                                                                                                                                         | <p>  Solidarity Movements   Demonstrations showing solidarity with farmers from other EU countries or protesting about broader social issues such as right-wing extremism and xenophobia.  </p>                                                                                                                                                                                                                                                                                                                                                                                                                                                                                                                                                                                                                                                                                                                                                                                                                                                                                                                                                                                                                                                                                                                                |                                                                                                 |
| 14 | <p>  <b>**Renewable Energy Projects**</b>   Protests against the development of large-scale renewable energy projects, arguing that they negatively impact agricultural land and practices.  </p> <p>  <b>**Climate Action and Renewable Energy Projects**</b>   Demonstrations against large-scale renewable energy projects, such as wind and solar parks that are perceived to negatively impact agricultural land and local environments.  </p> <p>  <b>**Climate Action and Renewable Energy Projects**</b>   Demonstrations against large-scale renewable energy projects, such as wind and solar parks that are perceived to negatively impact agricultural land and local environments.  </p>                                                                                                                                                                                                              | <p>  <b>**Climate Action and Renewable Energy Projects**</b>   Demonstrations against large-scale renewable energy projects, such as wind and solar parks that are perceived to negatively impact agricultural land and local environments.  </p> <p>  <b>**Climate Action and Renewable Energy Projects**</b>   Demonstrations against large-scale renewable energy projects, such as wind and solar parks that are perceived to negatively impact agricultural land and local environments.  </p> <p>  <b>**Renewable Energy Projects**</b>   Protests against the development of large-scale renewable energy projects, arguing that they negatively impact agricultural land and practices.  </p>                                                                                                                                                                                                                                                                                                                                                                                                                                                                                                                                                                                                                          | Author x and y agreement.                                                                       |
| 15 | <p>  Agricultural Livelihoods   Protests focused on the economic hardships and survival of the agricultural sector, including issues like low production prices and lack of consideration for farmers' work.  </p> <p>  Economic Hardship   Demonstrations addressing the economic difficulties faced by the agricultural sector, including debt relief and financial compensations.  </p> <p>  Economic Difficulties   Protests highlighting the economic struggles faced by farmers, including demands for state and institutional financial support.  </p> <p>  Price Issues and Economic Difficulties   Protests that address low production prices for farmers, high production costs, and economic hardships in the farming sector.  </p> <p>  Economic Difficulties   Protests highlighting the economic struggles faced by farmers, including demands for state and institutional financial support.  </p> | <p>  Economic Hardship   Demonstrations addressing the economic difficulties faced by the agricultural sector, including debt relief and financial compensations.  </p> <p>  <b>**Economic Struggles and Livelihoods**</b>   Demonstrations driven by broader economic challenges in the agricultural sector, advocating for the survival of farms and better working conditions for agricultural workers.  </p> <p>  Agricultural Livelihoods   Protests focused on the economic hardships and survival of the agricultural sector, including issues like low production prices and lack of consideration for farmers' work.  </p> <p>  Economic Difficulties   Protests highlighting the economic struggles faced by farmers, including demands for state and institutional financial support.  </p> <p>  Economic Difficulties   Protests highlighting the economic struggles faced by farmers, including demands for state and institutional financial support.  </p> <p>  Price Issues and Economic Difficulties   Protests that address low production prices for farmers, high production costs, and economic hardships in the farming sector.  </p> <p>  Economic Difficulties   Protests highlighting the economic struggles faced by farmers, including demands for state and institutional financial support.  </p> | Author x and y agreement.                                                                       |
| 16 | <p>  <b>**Consumer Relations**</b>   Efforts to raise awareness among consumers and draw attention to agricultural issues, often involving actions at supermarkets and food distribution centers.  </p> <p>  <b>**Consumer Impact Awareness**</b>   Actions aimed at raising public awareness about the impact of policies on local food production and prices.  </p>                                                                                                                                                                                                                                                                                                                                                                                                                                                                                                                                              | <p>  <b>**Consumer Relations**</b>   Efforts to raise awareness among consumers and draw attention to agricultural issues, often involving actions at supermarkets and food distribution centers.  </p> <p>  <b>**Consumer Impact Awareness**</b>   Actions aimed at raising public awareness about the impact of policies on local food production and prices.  </p>                                                                                                                                                                                                                                                                                                                                                                                                                                                                                                                                                                                                                                                                                                                                                                                                                                                                                                                                                          | Author x and y agreement.                                                                       |
| 17 | <p>  <b>**Counteracting Unfair Competition**</b>   Protest movements highlighting competition from foreign farmers and products that are viewed as being sold at unfairly low prices, thus harming domestic agricultural markets.  </p> <p>  <b>**Fair Competition**</b>   Opposition to unfair competition from imported goods and calls for better protection for local farmers against low-cost foreign products.  </p> <p>  Protection of Domestic Agriculture   Protests aimed at safeguarding local agriculture from unfair competition through tighter regulations on foreign imports and better local support.  </p>                                                                                                                                                                                                                                                                                       | <p>  <b>**Fair Compensation**</b>   Protests demanding better compensation for their products from large retailers and fair production prices for agricultural goods.  </p> <p>  Agricultural Standards Compliance   Demands for fair production prices and consistency in agricultural standards, insisting that partner countries comply with EU's standards.  </p> <p>  <b>**Fair Competition**</b>   Opposition to unfair competition from imported goods and calls for better protection for local farmers against low-cost foreign products.  </p> <p>  <b>**Fair Prices and Compensation**</b>   Protests demanding fair production prices, compensation from large retailers, and higher financial support/pay increases for farmers, including for specific produce like milk and bananas.  </p> <p>  Compensation and Insurance   Protests demanding better compensation payments, reduced insurance fees, and improved insurance and working capital programs.  </p>                                                                                                                                                                                                                                                                                                                                                | Agreement that no clear separation of 17, 18 and 19 possible. Therefore combined to 1 category. |
| 18 |                                                                                                                                                                                                                                                                                                                                                                                                                                                                                                                                                                                                                                                                                                                                                                                                                                                                                                                    | <p>  <b>**Market Prices**</b>   Protests for fair production prices and measures to improve the income and living conditions of farmers.  </p> <p>  <b>**Low Production Prices**</b>   Protests focused on the low prices paid for agricultural products, which are seen as insufficient to cover the costs of production and ensure a viable income for farmers.  </p>                                                                                                                                                                                                                                                                                                                                                                                                                                                                                                                                                                                                                                                                                                                                                                                                                                                                                                                                                        |                                                                                                 |

|    |                                                                                                                                                                                                                                                                                                                                                                                                                                                                                                                                                                                                                                                                                                                                                                                                                                                                                                                                                                                                                                                                                                                          |                                                                                                                                                                                                                                                                                                                                                                                                                                                                                                                                                                                                                                                                                                                                                                                                                                                                                                                                                                                                                                                                                                                                                                                                                                                                                                                                    |                                                                                  |
|----|--------------------------------------------------------------------------------------------------------------------------------------------------------------------------------------------------------------------------------------------------------------------------------------------------------------------------------------------------------------------------------------------------------------------------------------------------------------------------------------------------------------------------------------------------------------------------------------------------------------------------------------------------------------------------------------------------------------------------------------------------------------------------------------------------------------------------------------------------------------------------------------------------------------------------------------------------------------------------------------------------------------------------------------------------------------------------------------------------------------------------|------------------------------------------------------------------------------------------------------------------------------------------------------------------------------------------------------------------------------------------------------------------------------------------------------------------------------------------------------------------------------------------------------------------------------------------------------------------------------------------------------------------------------------------------------------------------------------------------------------------------------------------------------------------------------------------------------------------------------------------------------------------------------------------------------------------------------------------------------------------------------------------------------------------------------------------------------------------------------------------------------------------------------------------------------------------------------------------------------------------------------------------------------------------------------------------------------------------------------------------------------------------------------------------------------------------------------------|----------------------------------------------------------------------------------|
|    |                                                                                                                                                                                                                                                                                                                                                                                                                                                                                                                                                                                                                                                                                                                                                                                                                                                                                                                                                                                                                                                                                                                          | <p>  <b>**Low Production Prices**</b>   Protests focused on the low prices paid for agricultural products, which are seen as insufficient to cover the costs of production and ensure a viable income for farmers.</p> <p>  <b>**Fair Production Prices**</b>   Protests demanding fairer production prices to sustain local farmers' livelihoods and competitiveness.</p>                                                                                                                                                                                                                                                                                                                                                                                                                                                                                                                                                                                                                                                                                                                                                                                                                                                                                                                                                         |                                                                                  |
| 19 | <p>  <b>**Supply Chain and Market Distribution**</b>   Protests focused on issues within the agricultural supply chain, including disruptions caused by supermarket practices and the need for better market distribution channels for local produce.  </p>                                                                                                                                                                                                                                                                                                                                                                                                                                                                                                                                                                                                                                                                                                                                                                                                                                                              | <p>  <b>**Supermarket Compensation and Trade Practices**</b>   Demands for fairer compensation from large retailers and critiques of unfair trade practices that negatively affect local farmers.</p> <p>  <b>**Supply Chain and Market Distribution**</b>   Protests focused on issues within the agricultural supply chain, including disruptions caused by supermarket practices and the need for better market distribution channels for local produce.  </p>                                                                                                                                                                                                                                                                                                                                                                                                                                                                                                                                                                                                                                                                                                                                                                                                                                                                  |                                                                                  |
| 20 | <p>  <b>**Animal Welfare and Livestock Breeding Issues**</b>   Protests emphasizing issues specific to livestock breeders, including animal welfare regulations, financial support, and market conditions for meat and animal products.  </p> <p>  Livestock and Beekeeping Concerns   Protests concerning EU policies on livestock, beekeeping, and the importation of foreign honey.  </p> <p>  Agriculture and Livestock Policies   Protests directed against specific agricultural and livestock policies set by national or EU authorities that are seen as detrimental to farmers' livelihoods.  </p>                                                                                                                                                                                                                                                                                                                                                                                                                                                                                                              |                                                                                                                                                                                                                                                                                                                                                                                                                                                                                                                                                                                                                                                                                                                                                                                                                                                                                                                                                                                                                                                                                                                                                                                                                                                                                                                                    | Only Author x separated this category. All authors agree to include in analysis. |
| 21 | <p>  Opposition to Specific Agricultural Products   Protests against certain agricultural products, such as laboratory-designed meat and flour produced using insects.  </p> <p>  Specific Product Regulations   Demonstrations targeting regulations on specific products like laboratory-made meat, flour produced using insects, and honey import restrictions.  </p> <p>  Opposition to Synthetic Products   Protests against laboratory-made meat, flour produced using insects, and similar synthetic products impacting traditional farming.</p>                                                                                                                                                                                                                                                                                                                                                                                                                                                                                                                                                                  | <p>  Opposition to Synthetic Products   Protests against laboratory-made meat, flour produced using insects, and similar synthetic products impacting traditional farming.</p> <p>  Opposition to Specific Agricultural Products   Protests against certain agricultural products, such as laboratory-designed meat and flour produced using insects.  </p> <p>  Import Regulation and Safety   Protests against the perceived inequities and dangers posed by imported products, such as GMO crops, laboratory-made meat, and insect-based flour.  </p> <p>  <b>**Cultural Impact &amp; Authenticity**</b>   Protests objecting to cultural and dietary changes like laboratory-made meat, flour produced using insects, and other agricultural innovations.  </p> <p>  Specific Product Regulations   Demonstrations targeting regulations on specific products like laboratory-made meat, flour produced using insects, and honey import restrictions.  </p> <p>  Specific Product Regulations   Demonstrations targeting regulations on specific products like laboratory-made meat, flour produced using insects, and honey import restrictions.  </p> <p>  <b>**Specific Regional Issues**</b>   Localized issues like droughts, laboratory-made meat, insect flour, and specific regional policies affecting farmers.  </p> | Author x and y agreement.                                                        |
| 22 | <p>  <b>**Infrastructural and Logistical Protests**</b>   Demonstrations involved in blocking highways, supermarkets, ports, and other infrastructural points as a form of protest, causing logistical disruptions to draw attention to their demands.  </p> <p>  <b>**Trade and Transport Policies**</b>   Protests targeting what are seen as unfair conditions for transport and trade companies, particularly in cross-border trade scenarios.  </p> <p>  Trade and Transport Policies   Protests regarding unfavorable trade and transport policies, often involving truck drivers and transport unions.  </p> <p>  <b>**Infrastructure Issues**</b>   Protests targeting infrastructural issues such as roadblocks, highway exits, and access to distribution centers.  </p> <p>  Local Environmental and Infrastructure Concerns   Protests against local projects seen as damaging to biodiversity, agriculture, and local economic conditions.  </p> <p>  Trade and Transport Policies   Protests regarding unfavorable trade and transport policies, often involving truck drivers and transport unions.  </p> | <p>  <b>**Infrastructure Issues**</b>   Protests targeting infrastructural issues such as roadblocks, highway exits, and access to distribution centers.  </p> <p>  <b>**Infrastructural and Logistical Protests**</b>   Demonstrations involved in blocking highways, supermarkets, ports, and other infrastructural points as a form of protest, causing logistical disruptions to draw attention to their demands.  </p> <p>  <b>**Trade and Transport Policies**</b>   Protests targeting what are seen as unfair conditions for transport and trade companies, particularly in cross-border trade scenarios.  </p> <p>  <b>**Trade and Labor Regulations**</b>   Protests focused on the unfair competition from imported goods that do not meet the same standards as domestic products, including livestock and grain, as well as general trade and labor rules.  </p> <p>  Trade and Transport Policies   Protests regarding unfavorable trade and transport policies, often involving truck drivers and transport unions.  </p>                                                                                                                                                                                                                                                                                           | Author x and y agreement.                                                        |

|    |                                                                                                                                                                                                                                                                                                                                                                                                                                                                                                                                                                                                                                                                                                                                                                                                                                                                                                                                                                                                                                                                                                                                                                                                                                                                                                                                                                                                                                                                                                                                                                                                                                                                                                                                                                                                                                                                                                                                                                                                                                                                                                                                                                                                                                                                                                                                                                                                                                                                                                                                                                                                                                                                                                                                                                                                                                                                                                                                                                                                                        |                                                                                                                                                                                                                                                                                                                                                                                                                                                                                                                                                                                                                                                                                                                                                                                                                                                                                                                                                                                                                                                                                                                                                                                                                                                                                                                                                                                                                                                                      |                                                                                                                                                                                                                                                                                                                                                                                                                                                                                                                                                                                                                                                                                                                                                                                                                                                                                                                                                                                                                                                                                                                                                                                                                                                                                                                                                                                                                                                                                                                                                                                                                                                                                                       |
|----|------------------------------------------------------------------------------------------------------------------------------------------------------------------------------------------------------------------------------------------------------------------------------------------------------------------------------------------------------------------------------------------------------------------------------------------------------------------------------------------------------------------------------------------------------------------------------------------------------------------------------------------------------------------------------------------------------------------------------------------------------------------------------------------------------------------------------------------------------------------------------------------------------------------------------------------------------------------------------------------------------------------------------------------------------------------------------------------------------------------------------------------------------------------------------------------------------------------------------------------------------------------------------------------------------------------------------------------------------------------------------------------------------------------------------------------------------------------------------------------------------------------------------------------------------------------------------------------------------------------------------------------------------------------------------------------------------------------------------------------------------------------------------------------------------------------------------------------------------------------------------------------------------------------------------------------------------------------------------------------------------------------------------------------------------------------------------------------------------------------------------------------------------------------------------------------------------------------------------------------------------------------------------------------------------------------------------------------------------------------------------------------------------------------------------------------------------------------------------------------------------------------------------------------------------------------------------------------------------------------------------------------------------------------------------------------------------------------------------------------------------------------------------------------------------------------------------------------------------------------------------------------------------------------------------------------------------------------------------------------------------------------------|----------------------------------------------------------------------------------------------------------------------------------------------------------------------------------------------------------------------------------------------------------------------------------------------------------------------------------------------------------------------------------------------------------------------------------------------------------------------------------------------------------------------------------------------------------------------------------------------------------------------------------------------------------------------------------------------------------------------------------------------------------------------------------------------------------------------------------------------------------------------------------------------------------------------------------------------------------------------------------------------------------------------------------------------------------------------------------------------------------------------------------------------------------------------------------------------------------------------------------------------------------------------------------------------------------------------------------------------------------------------------------------------------------------------------------------------------------------------|-------------------------------------------------------------------------------------------------------------------------------------------------------------------------------------------------------------------------------------------------------------------------------------------------------------------------------------------------------------------------------------------------------------------------------------------------------------------------------------------------------------------------------------------------------------------------------------------------------------------------------------------------------------------------------------------------------------------------------------------------------------------------------------------------------------------------------------------------------------------------------------------------------------------------------------------------------------------------------------------------------------------------------------------------------------------------------------------------------------------------------------------------------------------------------------------------------------------------------------------------------------------------------------------------------------------------------------------------------------------------------------------------------------------------------------------------------------------------------------------------------------------------------------------------------------------------------------------------------------------------------------------------------------------------------------------------------|
|    |                                                                                                                                                                                                                                                                                                                                                                                                                                                                                                                                                                                                                                                                                                                                                                                                                                                                                                                                                                                                                                                                                                                                                                                                                                                                                                                                                                                                                                                                                                                                                                                                                                                                                                                                                                                                                                                                                                                                                                                                                                                                                                                                                                                                                                                                                                                                                                                                                                                                                                                                                                                                                                                                                                                                                                                                                                                                                                                                                                                                                        | <p>  <b>**Immigration and Cross-Border Trade Issues**</b>   Protests related to cross-border trade and immigration policies that are perceived to affect local agricultural economies and labor markets.  </p> <p>  Trade and Transport Policies   Protests regarding unfavorable trade and transport policies, often involving truck drivers and transport unions.  </p>                                                                                                                                                                                                                                                                                                                                                                                                                                                                                                                                                                                                                                                                                                                                                                                                                                                                                                                                                                                                                                                                                            |                                                                                                                                                                                                                                                                                                                                                                                                                                                                                                                                                                                                                                                                                                                                                                                                                                                                                                                                                                                                                                                                                                                                                                                                                                                                                                                                                                                                                                                                                                                                                                                                                                                                                                       |
| 23 | <p>  <b>**Technological Regulations and Innovation**</b>   Protests against regulations related to technological advancements in farming, including the restriction of new farming technologies or sustainable innovations.  </p> <p>  <b>**Employment and Training Issues**</b>   Protests focusing on the employment aspects of the agricultural sector, including demands for better training programs and job security for agricultural workers.  </p> <p>  <b>**Public Health and Safety Concerns**</b>   Demonstrations addressing the public health implications of agricultural policies, including the safety and quality of produce and farming practices.  </p> <p>  <b>**Miscellaneous Economic and Trade Policies**</b>   Protests against broader economic and trade policies impacting agriculture indirectly, including transportation costs, taxation, and trade regulations affecting profitability.  </p> <p>  <b>**Supermarket Compensation and Trade Practices**</b>   Demands for fairer compensation from large retailers and critiques of unfair trade practices that negatively affect local farmers.  </p> <p>  <b>**Immigration and Cross-Border Trade Issues**</b>   Protests related to cross-border trade and immigration policies that are perceived to affect local agricultural economies and labor markets.  </p> <p>  <b>**Miscellaneous Agriculture-Related Protests**</b>   Various other protests linked to specific regional or sector-specific issues not covered by the broader categories above, such as niche agricultural practices and local policies.  </p> <p>  <b>**Cultural Impact &amp; Authenticity**</b>   Protests objecting to cultural and dietary changes like laboratory-made meat, flour produced using insects, and other agricultural innovations.  </p> <p>  <b>**Environmental and Sustainability Advocacy**</b>   Protests advocating for sustainable agricultural practices and highlighting environmental concerns, sometimes conflicting with other demands for reduced restrictions.  </p> <p>  <b>**Sector Specific Issues**</b>   Protests by specific agricultural sectors like beekeepers, livestock breeders, and winegrowers, each with unique sets of demands and grievances.  </p> <p>  <b>**Political and Administrative Demands**</b>   Demands for direct dialogue with authorities, changes in domestic policies, and more government oversight and support for agricultural sectors.  </p> <p>  Agricultural Standards Compliance   Demands for fair production prices and consistency in agricultural standards, insisting that partner countries comply with EU's standards.  </p> <p>  <b>**Export Regulations**</b>   Demonstrations concerning regulations and policies on the export of agricultural products.  </p> <p>  <b>**Financial Aid and Structural Support**</b>   Appeals for continued funding and structural aid for the agricultural sector, including demands for better governmental support and oversight.  </p> | <p>  <b>**Miscellaneous Local Issues**</b>   Protests addressing unique local agricultural issues and grievances not falling under broader categories, including compensation for specific incidents or localized policy impacts.  </p> <p>  <b>**Miscellaneous Economic and Trade Policies**</b>   Protests against broader economic and trade policies impacting agriculture indirectly, including transportation costs, taxation, and trade regulations affecting profitability.  </p> <p>  <b>**Miscellaneous Agriculture-Related Protests**</b>   Various other protests linked to specific regional or sector-specific issues not covered by the broader categories above, such as niche agricultural practices and local policies.  </p> <p>  <b>**Technological Regulations and Innovation**</b>   Protests against regulations related to technological advancements in farming, including the restriction of new farming technologies or sustainable innovations.  </p> <p>  <b>**Public Health and Safety Concerns**</b>   Demonstrations addressing the public health implications of agricultural policies, including the safety and quality of produce and farming practices.  </p> <p>  <b>**Local Environmental and Land Management Issues**</b>   Concerns about local environmental and land management practices, including opposition to domestic policies that fail to address localized farming issues and land ownership complications.  </p> | <p>Miscellaneous categories suggested by LLM that can hardly be allocated to other categories because their focus is slightly different or these are categories that are just suggested 1 in 15 runs, which is why they are not counted as single category.</p> <p><b>Miscellaneous category:</b> Description contains information that is not present in other categories:</p> <p>  <b>**Technological Regulations and Innovation**</b>   Protests against regulations related to technological advancements in farming, including the restriction of new farming technologies or sustainable innovations.  </p> <p>  <b>**Employment and Training Issues**</b>   Protests focusing on the employment aspects of the agricultural sector, including demands for better training programs and job security for agricultural workers.  </p> <p>  <b>**Public Health and Safety Concerns**</b>   Demonstrations addressing the public health implications of agricultural policies, including the safety and quality of produce and farming practices.  </p> <p>  <b>**Immigration and Cross-Border Trade Issues**</b>   Protests related to cross-border trade and immigration policies that are perceived to affect local agricultural economies and labor markets.  </p> <p>  <b>**Miscellaneous Agriculture-Related Protests**</b>   Various other protests linked to specific regional or sector-specific issues not covered by the broader categories above, such as niche agricultural practices and local policies.  </p> <p>  <b>**Environmental and Sustainability Advocacy**</b>   Protests advocating for sustainable agricultural practices and highlighting environmental concerns,  </p> |

|    |                                                                                                                                                                                                                                                                                                                                                                                                                                                                                                                                                                                                                                                                                                                                                                                                                                                                                                                                                                                                                                                                                          |                                                                                                                                                                                                                                                                                                                                                                                                                                                                                                                                                                                                                                                                                                                                                                                                                                                                                                                                                                                                                                    |                                                                                                                                                                                                                                                                                                                                                                                                                                                                                                                                  |
|----|------------------------------------------------------------------------------------------------------------------------------------------------------------------------------------------------------------------------------------------------------------------------------------------------------------------------------------------------------------------------------------------------------------------------------------------------------------------------------------------------------------------------------------------------------------------------------------------------------------------------------------------------------------------------------------------------------------------------------------------------------------------------------------------------------------------------------------------------------------------------------------------------------------------------------------------------------------------------------------------------------------------------------------------------------------------------------------------|------------------------------------------------------------------------------------------------------------------------------------------------------------------------------------------------------------------------------------------------------------------------------------------------------------------------------------------------------------------------------------------------------------------------------------------------------------------------------------------------------------------------------------------------------------------------------------------------------------------------------------------------------------------------------------------------------------------------------------------------------------------------------------------------------------------------------------------------------------------------------------------------------------------------------------------------------------------------------------------------------------------------------------|----------------------------------------------------------------------------------------------------------------------------------------------------------------------------------------------------------------------------------------------------------------------------------------------------------------------------------------------------------------------------------------------------------------------------------------------------------------------------------------------------------------------------------|
|    | <p>  <b>**Agricultural Trade and Market Protection**</b>   Actions against the extension or modification of agricultural trade practices that farmers believe negatively affect market stability and competition.  </p> <p>  <b>**Specific Regional Issues**</b>   Localized issues like droughts, laboratory-made meat, insect flour, and specific regional policies affecting farmers.  </p> <p>  <b>**Local Environmental and Land Management Issues**</b>   Concerns about local environmental and land management practices, including opposition to domestic policies that fail to address localized farming issues and land ownership complications.  </p> <p>  <b>**Specific Regional Issues**</b>   Localized issues like drought relief measures, compensation for natural disasters, and region-specific agricultural policies.  </p> <p>  <b>**Miscellaneous Local Issues**</b>   Protests addressing unique local agricultural issues and grievances not falling under broader categories, including compensation for specific incidents or localized policy impacts.  </p> |                                                                                                                                                                                                                                                                                                                                                                                                                                                                                                                                                                                                                                                                                                                                                                                                                                                                                                                                                                                                                                    | <p>sometimes conflicting with other demands for reduced restrictions.  </p> <p>  <b>**Political and Administrative Demands**</b>   Demands for direct dialogue with authorities, changes in domestic policies, and more government oversight and support for agricultural sectors.  </p> <p>  <b>**Miscellaneous Local Issues**</b>   Protests addressing unique local agricultural issues and grievances not falling under broader categories, including compensation for specific incidents or localized policy impacts.  </p> |
| 24 |                                                                                                                                                                                                                                                                                                                                                                                                                                                                                                                                                                                                                                                                                                                                                                                                                                                                                                                                                                                                                                                                                          | <p>  <b>**Sector Specific Issues**</b>   Protests by specific agricultural sectors like beekeepers, livestock breeders, and winegrowers, each with unique sets of demands and grievances.  </p> <p>  <b>Livestock and Beekeeping Concerns</b>   Protests concerning EU policies on livestock, beekeeping, and the importation of foreign honey.  </p> <p>  <b>Opposition to Specific Agricultural Products</b>   Protests against certain agricultural products, such as laboratory-designed meat and flour produced using insects.  </p> <p>  <b>**Support for Other Agricultural Sectors**</b>   Demonstrations including support for related sectors such as beekeeping, livestock breeding, and fisheries, reflecting solidarity within the broader agricultural industry.  </p> <p>  <b>**Animal Welfare and Livestock Breeding Issues**</b>   Protests emphasizing issues specific to livestock breeders, including animal welfare regulations, financial support, and market conditions for meat and animal products.  </p> | Contained in categories 21 and 18                                                                                                                                                                                                                                                                                                                                                                                                                                                                                                |
