# Supplementary material for: Large language model analysis reveals key reasons behind massive farmer protests in Europe
Source: Research Square preprint supplement (doi:10.21203/rs.3.rs-6652927/v1), 2025-06-18
Supplement: Supplementary file 4 [file S6_supplementary_results.docx]

# Supplementary Results: Supporting information


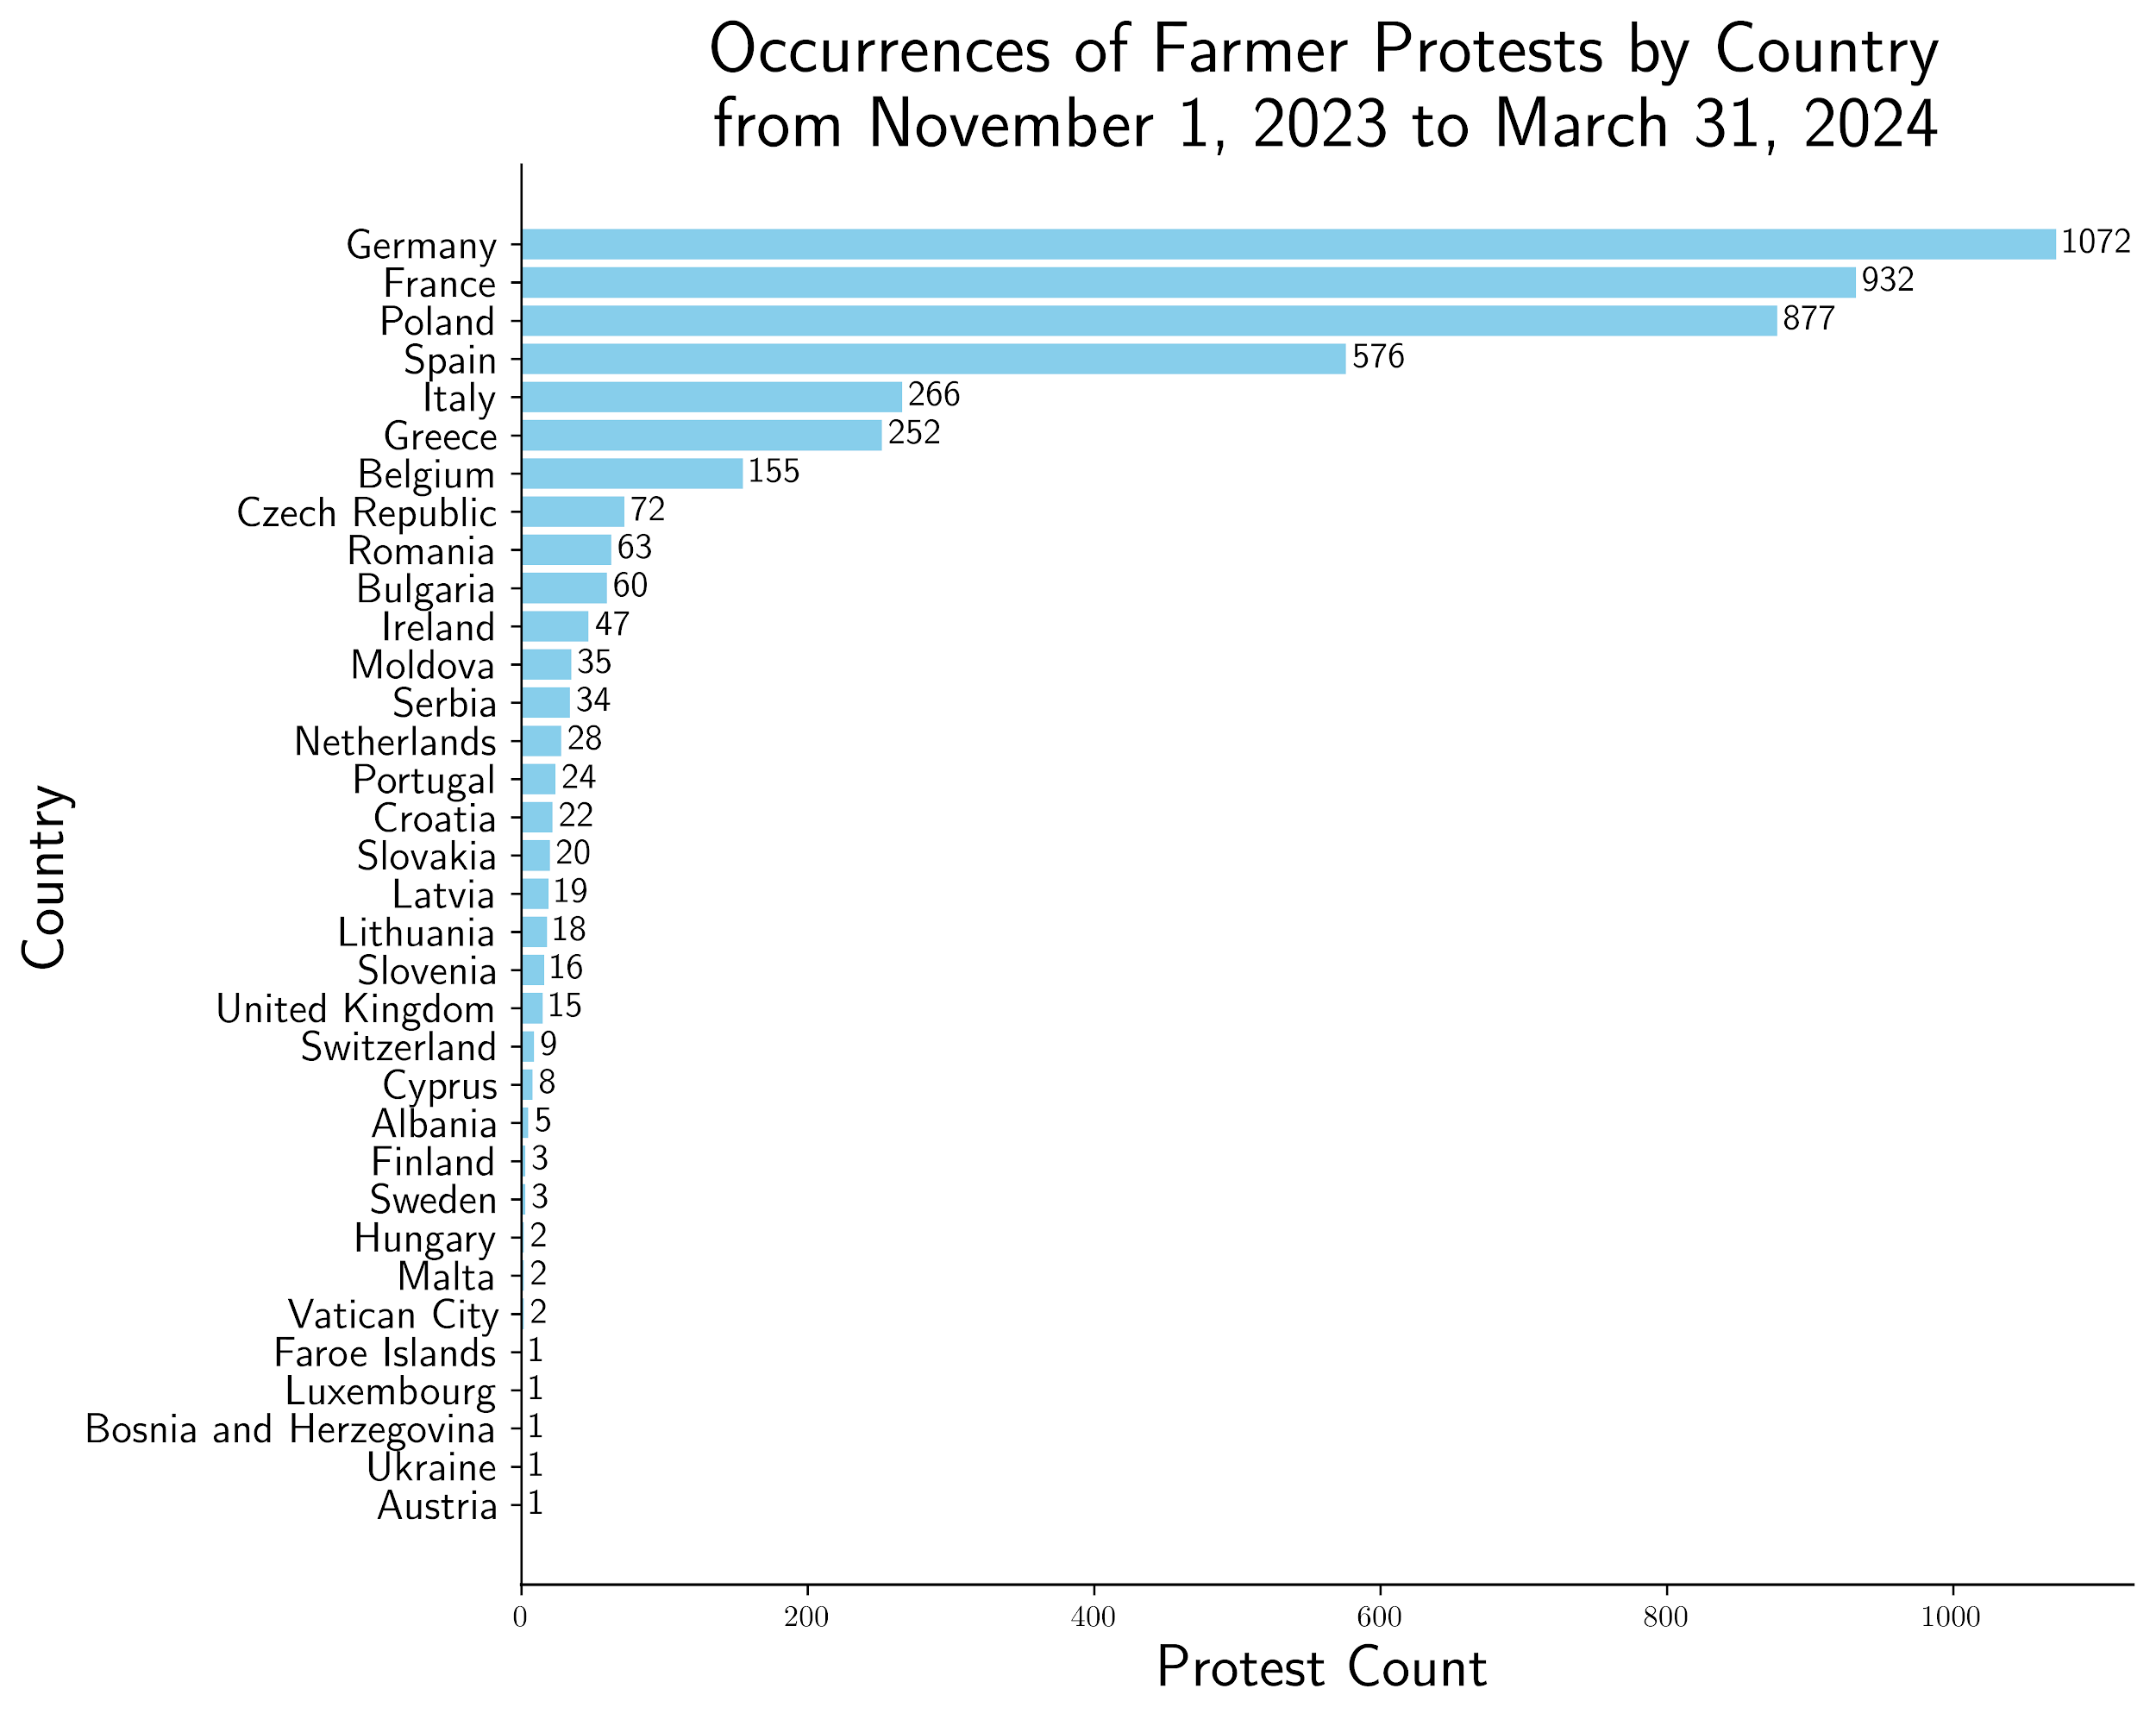


Figure S 6 - 1: Total number of farmer protests from November 1, 2023 to March 31, 2024 in Europe. Data source: ACLED


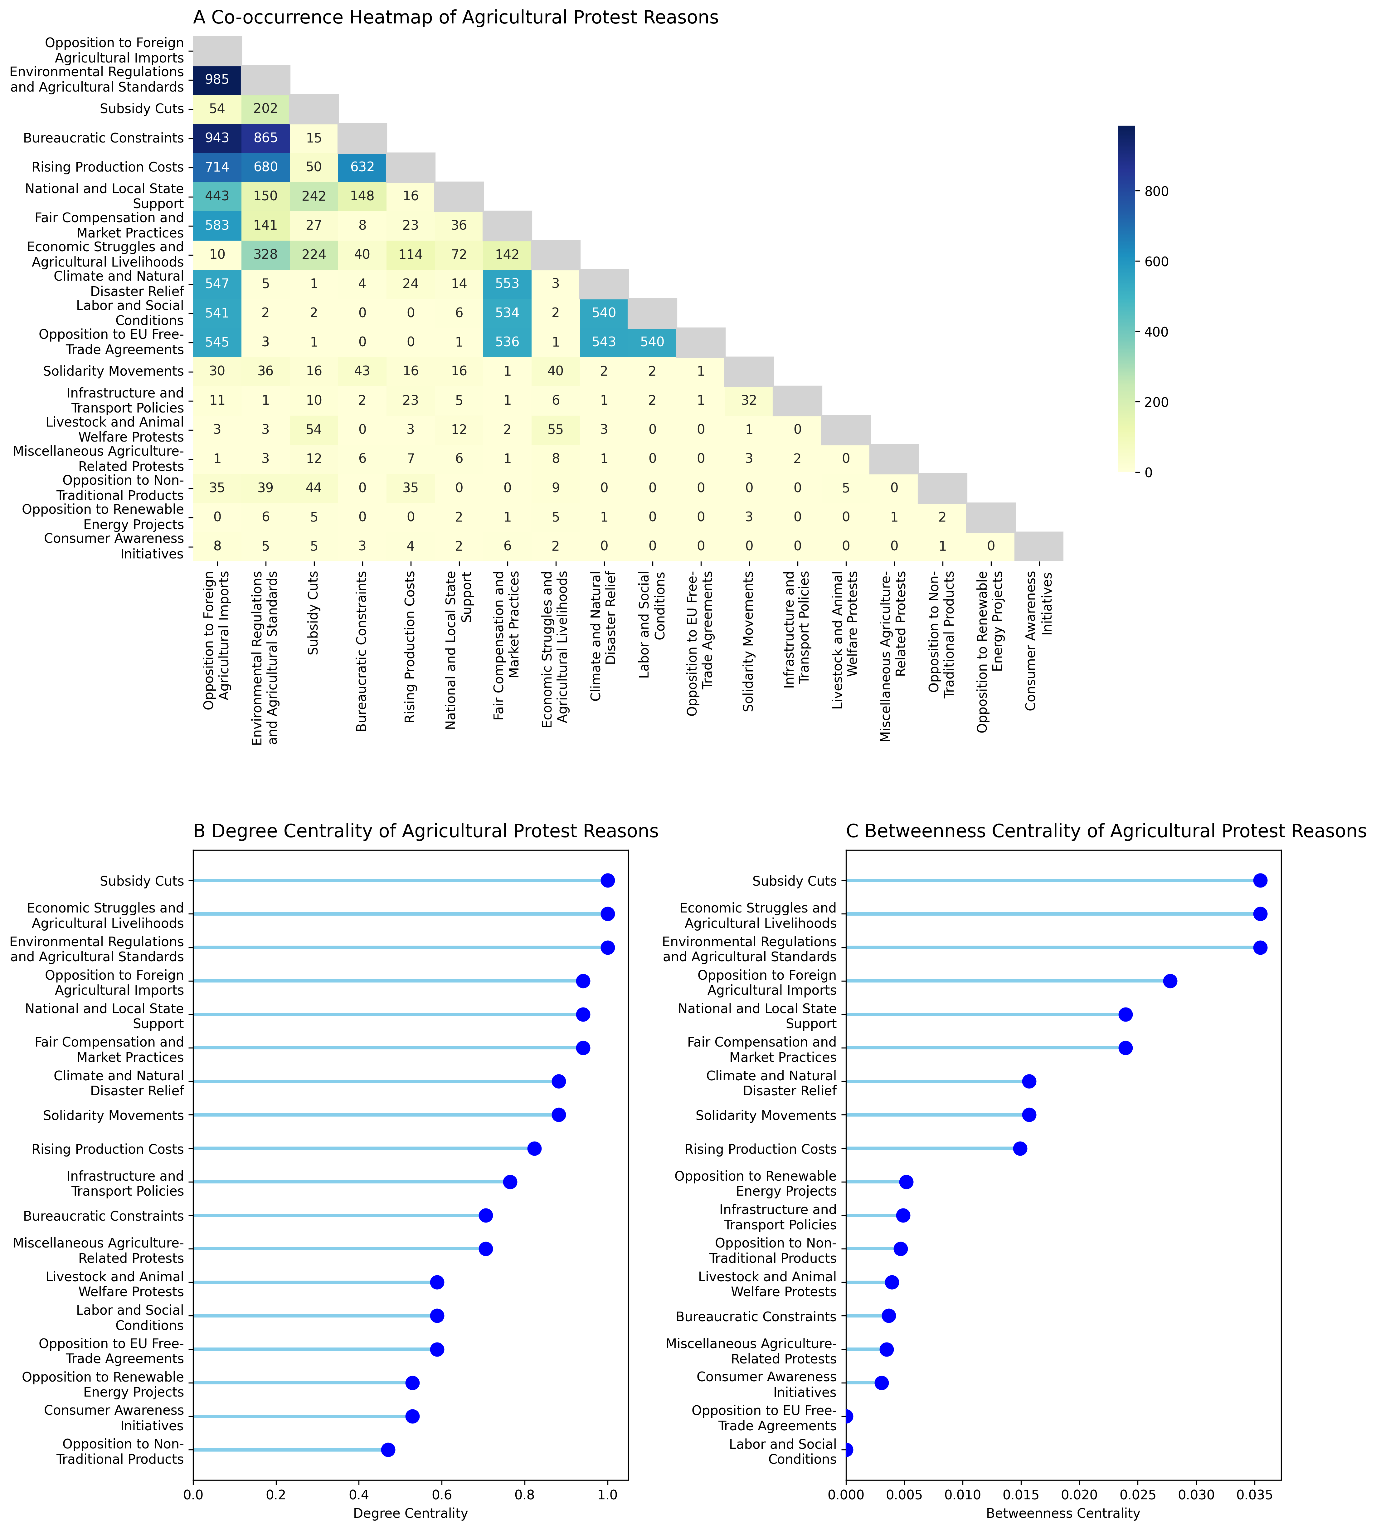


Figure S 6 - 2: Co-occurrence of farm protest reasons and centrality measures.
