# Supplementary material for: Large language model analysis reveals key reasons behind massive farmer protests in Europe
Source: Research Square preprint supplement (doi:10.21203/rs.3.rs-6652927/v1), 2025-06-18
Supplement: Supplementary file 13 [file categories_sorted_raw_cs_af.xlsx]

## Sheet: Sheet1
num	x	y	note
1	| **Rising Production Costs** | Protests driven by the increasing costs of production, including fuel, fertilizers, and other agricultural inputs. | | Production Costs | Protests related to the rising costs of production, including high insurance fees, fuel prices, and energy costs. | | **High Production Costs** | Protests over rising production costs, including energy, fuel, insurance, and ferti…	| **Rising Production Costs** | Protests driven by the increasing costs of production, including fuel, fertilizers, and other agricultural inputs. | | Production Costs | Protests related to the rising costs of production, including high insurance fees, fuel prices, and energy costs. | | **High Production Costs** | Protests over rising production costs, including energy, fuel, insurance, and ferti…	Author x and y agreement.
2	| **Environmental Regulations** | Protests against stricter environmental regulations and norms, including those restricting the use of pesticides and other chemicals deemed necessary by farmers. | | **EU Agricultural Standards and Policies** | Protests against EU regulations and standards, including the "Green Deal" and pesticide use, which are perceived as bureaucratic and excessively restricti…	| **EU Agricultural Standards and Policies** | Protests against EU regulations and standards, including the "Green Deal" and pesticide use, which are perceived as bureaucratic and excessively restrictive by farmers. | EU Agricultural Policies | Protests targeting overall EU agricultural standards and policies, particularly the ratification of EU's free-trade agreements. | | **EU Agricultural Poli…	Author x did not separate 2 and 3, whereas Author y did. All authors agree to combine 2 and 3 because they provide very similar or even the same information.
3		| **Environmental Regulations** | Protests against stricter environmental regulations and norms, including those restricting the use of pesticides and other chemicals deemed necessary by farmers. | Environmental Regulations | Protests against stricter environmental norms, such as those restricting the use of pesticides and regulations related to the so-called Green Deal. | | **Environmental Regul…
4	| **Trade and Labor Regulations** | Protests focused on the unfair competition from imported goods that do not meet the same standards as domestic products, including livestock and grain, as well as general trade and labor rules.| | **Free-Trade Agreements** | Demonstrations opposing the ratification of the EU's free-trade agreements unless third countries comply with EU agricultural standards, a…	| **Free-Trade Agreements** | Demonstrations opposing the ratification of the EU's free-trade agreements unless third countries comply with EU agricultural standards, aiming for fair competition and production prices. | | **Free Trade Agreements** | Opposition to ratification of EU's free-trade agreements until partner third countries comply with EU agricultural standards. | | **Free-Trade Agreem…	Author x and y agreement.
5	| **Environmental Norms & Bureaucracy** | Protests against stricter environmental regulations, the EU's Green Deal, bureaucratic constraints, and related impacts on farming practices. | | **Bureaucratic Constraints** | Protests addressing excessive administrative burdens, including paperwork and compliance requirements, that farmers believe hinder their operational efficiency and sustainability. …	| Bureaucratic Constraints | Demonstrations against excessive bureaucratic burdens related to agricultural processes, state support, and subsidies. | | **Bureaucratic Constraints** | Demonstrations against excessive bureaucratic processes and administrative burdens faced by farmers. | | **Excessive Bureaucracy** | Actions opposing the perceived excessive bureaucracy and administrative burdens pla…	Author x and y agreement.
6	| **Import of Low-Quality Goods** | Actions targeting the importation of lower-quality agricultural products, particularly from non-EU countries, which harm domestic markets and consumer trust. | | Foreign Imports and Trade Agreements | Protests against the import of agricultural products from foreign countries (e.g., Ukraine), opposition to EU trade agreements deemed harmful to local farmers, an…	| **Foreign Imports** | Protests against the importation of foreign agricultural products. Particularly the imports from Ukraine, which are viewed as undercutting domestic market prices and generating unfair competition.| | Foreign Imports | Demonstrations against the import of foreign agricultural products, particularly from Ukraine, that are seen as undercutting local farmers' prices. | | **Imp…	Author x and y agreement.
7	| **Subsidy Cuts** | Protests against national governments’ plans to cut subsidies and tax exemptions for the agricultural sector, including agricultural diesel subsidies. | | Agricultural Subsidies | Protests concerning the cut or delayed distribution of agricultural subsidies, including Agrardiesel and vehicle tax exemptions. | | **Subsidy Cuts** | Protests where farmers oppose government plans…	| **Subsidy Cuts** | Protests against national governments’ plans to cut subsidies and tax exemptions for the agricultural sector, including agricultural diesel subsidies. | Agricultural Subsidies | Protests concerning the cut or delayed distribution of agricultural subsidies, including Agrardiesel and vehicle tax exemptions. | | **Subsidy Cuts** | Protests where farmers oppose government plans t…	Author x and y agreement.
8	| EU Agricultural Policies | Protests targeting overall EU agricultural standards and policies, particularly the ratification of EU's free-trade agreements. | | **EU Agricultural Policies** | Protests against various agricultural policies set by the European Union, including the Green Deal, and Common Agricultural Policy. | | EU Agricultural Policies | Protests targeting overall EU agricultural s…		8 will not be used as own category because it does not contain any extra information on top of categories 1 and 2.
9	| **Call for State Support** | Broad demands for increased state or financial support for national agriculture. | | **National Agricultural Policies** | Protests targeting specific national agricultural policies, including taxation on agricultural diesel, road tolls, and vehicle tax exemptions. | | Specific National Regulations | Demonstrations targeting specific national policies, such as nitrog…	| **Local Agricultural Policies** | Demonstrations against national policies specific to local agricultural practices, such as nitrogen policies and land use regulations. | | **National Agricultural Policies** | Demonstrations against national government policies on agriculture, including those affecting tax regulations, subsidies, and overall agricultural policy direction. | | Local Environmenta…	9 and 10 relate to domestic and local policies and support. Separation not clear right away. Therefore 9 and 10 are combined to one category.
10	| **Local Agricultural Policies** | Demonstrations against national policies specific to local agricultural practices, such as nitrogen policies and land use regulations. | | **National Agricultural Policies** | Demonstrations against national government policies on agriculture, including those affecting tax regulations, subsidies, and overall agricultural policy direction. | | **Governmental Agr…
11	| **Natural Disasters and Climate Conditions** | Demonstrations calling for relief measures to offset the consequences of droughts, floods, and other climatic impacts affecting agricultural production. | | Natural Disasters | Movements demanding immediate compensation and relief measures following natural disasters such as droughts and floods. | | **Climate Change & Natural Disasters** | Demands …	| **Natural Disasters and Climate Conditions** | Demonstrations calling for relief measures to offset the consequences of droughts, floods, and other climatic impacts affecting agricultural production. | Natural Disasters | Movements demanding immediate compensation and relief measures following natural disasters such as droughts and floods. | | **Climate Change & Natural Disasters** | Demands fo…	Author x and y agreement.
12	| **Social and Labor Conditions** | Calls for better working and social conditions within the agricultural sector. | | **Social and Working Conditions** | Protests aiming to improve the working and social conditions within the agricultural sector, including demands for better contracts and employment terms. | | Labor and Social Conditions | Movements advocating for better working and social condi…	| **Labor Conditions** | Protests seeking better working and social conditions for farmworkers, including demands for improved labor rights and safety standards. | Labor and Social Conditions | Movements advocating for better working and social conditions for farmers, including fairer pay and support measures during crises such as droughts. | | **Social & Working Conditions** | Calls for improved…	Author x and y agreement.
13	| **Economic Solidarity** | Protests showcasing solidarity with truck drivers and other affected sectors, focusing on shared economic and regulatory burdens. | Solidarity Movements | Protests showing solidarity with other European or national farmer movements on similar issues. | | **Solidarity with Broader Social Movements** | Displays of solidarity with broader social issues beyond farming, inc…	| **Economic Solidarity** | Protests showcasing solidarity with truck drivers and other affected sectors, focusing on shared economic and regulatory burdens. | **Solidarity with Broader Social Movements** | Displays of solidarity with broader social issues beyond farming, including anti-racism, immigrant rights, and other socio-political movements. | | Social Equality Movements | Movements by far…	Author x and y agreement.
14	| **Renewable Energy Projects** | Protests against the development of large-scale renewable energy projects, arguing that they negatively impact agricultural land and practices. | | **Climate Action and Renewable Energy Projects** | Demonstrations against large-scale renewable energy projects, such as wind and solar parks that are perceived to negatively impact agricultural land and local environ…	| **Climate Action and Renewable Energy Projects** | Demonstrations against large-scale renewable energy projects, such as wind and solar parks that are perceived to negatively impact agricultural land and local environments. | | **Climate Action and Renewable Energy Projects** | Demonstrations against large-scale renewable energy projects, such as wind and solar parks that are perceived to negat…	Author x and y agreement.
15	| Agricultural Livelihoods | Protests focused on the economic hardships and survival of the agricultural sector, including issues like low production prices and lack of consideration for farmers' work. | | | Economic Hardship | Demonstrations addressing the economic difficulties faced by the agricultural sector, including debt relief and financial compensations. | | Economic Difficulties | Protes…	| Economic Hardship | Demonstrations addressing the economic difficulties faced by the agricultural sector, including debt relief and financial compensations. | | **Economic Struggles and Livelihoods** | Demonstrations driven by broader economic challenges in the agricultural sector, advocating for the survival of farms and better working conditions for agricultural workers. | | Agricultural Live…	Author x and y agreement.
16	| **Consumer Relations** | Efforts to raise awareness among consumers and draw attention to agricultural issues, often involving actions at supermarkets and food distribution centers. | **Consumer Impact Awareness** | Actions aimed at raising public awareness about the impact of policies on local food production and prices. |	| **Consumer Relations** | Efforts to raise awareness among consumers and draw attention to agricultural issues, often involving actions at supermarkets and food distribution centers. | | **Consumer Impact Awareness** | Actions aimed at raising public awareness about the impact of policies on local food production and prices. |	Author x and y agreement.
17	| **Counteracting Unfair Competition** | Protest movements highlighting competition from foreign farmers and products that are viewed as being sold at unfairly low prices, thus harming domestic agricultural markets. | | | **Fair Competition** | Opposition to unfair competition from imported goods and calls for better protection for local farmers against low-cost foreign products. | | Protection o…	| **Fair Compensation** | Protests demanding better compensation for their products from large retailers and fair production prices for agricultural goods. | Agricultural Standards Compliance | Demands for fair production prices and consistency in agricultural standards, insisting that partner countries comply with EU's standards. | | **Fair Competition** | Opposition to unfair competition from i…	Agreement that no clear separation of 17, 18 and 19 possible. Therefore combined to 1 category.
18		| **Market Prices** | Protests for fair production prices and measures to improve the income and living conditions of farmers. | | **Low Production Prices** | Protests focused on the low prices paid for agricultural products, which are seen as insufficient to cover the costs of production and ensure a viable income for farmers. | | **Low Production Prices** | Protests focused on the low prices pa…
19	| **Supply Chain and Market Distribution** | Protests focused on issues within the agricultural supply chain, including disruptions caused by supermarket practices and the need for better market distribution channels for local produce. |	| **Supermarket Compensation and Trade Practices** | Demands for fairer compensation from large retailers and critiques of unfair trade practices that negatively affect local farmers. | **Supply Chain and Market Distribution** | Protests focused on issues within the agricultural supply chain, including disruptions caused by supermarket practices and the need for better market distribution channel…
20	| **Animal Welfare and Livestock Breeding Issues** | Protests emphasizing issues specific to livestock breeders, including animal welfare regulations, financial support, and market conditions for meat and animal products. | | Livestock and Beekeeping Concerns | Protests concerning EU policies on livestock, beekeeping, and the importation of foreign honey. | | Agriculture and Livestock Policies | …		Only Author x separated this category. All authors agree to include in analysis.
21	| Opposition to Specific Agricultural Products | Protests against certain agricultural products, such as laboratory-designed meat and flour produced using insects. | | Specific Product Regulations | Demonstrations targeting regulations on specific products like laboratory-made meat, flour produced using insects, and honey import restrictions. | | Opposition to Synthetic Products | Protests agains…	| Opposition to Synthetic Products | Protests against laboratory-made meat, flour produced using insects, and similar synthetic products impacting traditional farming. | Opposition to Specific Agricultural Products | Protests against certain agricultural products, such as laboratory-designed meat and flour produced using insects. | | Import Regulation and Safety | Protests against the perceived i…	Author x and y agreement.
22	| **Infrastructural and Logistical Protests** | Demonstrations involved in blocking highways, supermarkets, ports, and other infrastructural points as a form of protest, causing logistical disruptions to draw attention to their demands. | | **Trade and Transport Policies** | Protests targeting what are seen as unfair conditions for transport and trade companies, particularly in cross-border trade…	| **Infrastructure Issues** | Protests targeting infrastructural issues such as roadblocks, highway exits, and access to distribution centers. | | **Infrastructural and Logistical Protests** | Demonstrations involved in blocking highways, supermarkets, ports, and other infrastructural points as a form of protest, causing logistical disruptions to draw attention to their demands. | | **Trade and T…	Author x and y agreement.
23	| **Technological Regulations and Innovation** | Protests against regulations related to technological advancements in farming, including the restriction of new farming technologies or sustainable innovations. | | **Employment and Training Issues** | Protests focusing on the employment aspects of the agricultural sector, including demands for better training programs and job security for agricult…	| **Miscellaneous Local Issues** | Protests addressing unique local agricultural issues and grievances not falling under broader categories, including compensation for specific incidents or localized policy impacts. | | **Miscellaneous Economic and Trade Policies** | Protests against broader economic and trade policies impacting agriculture indirectly, including transportation costs, taxation, an…	Miscellaneous categories suggested by LLM that can hardly be allocated to other categories because their focus is slightly different or these are categories that are just suggested 1 in 15 runs, which is why they are not counted as single category. Miscellaneous category: Description contains information that is not present in other categories: | **Technological Regulations and Innovation** | Pro…
24		| **Sector Specific Issues** | Protests by specific agricultural sectors like beekeepers, livestock breeders, and winegrowers, each with unique sets of demands and grievances. | Livestock and Beekeeping Concerns | Protests concerning EU policies on livestock, beekeeping, and the importation of foreign honey. | | Opposition to Specific Agricultural Products | Protests against certain agricultural …	Contained in categories 21 and 18
