# Supplementary material for: Large language model analysis reveals key reasons behind massive farmer protests in Europe
Source: Research Square preprint supplement (doi:10.21203/rs.3.rs-6652927/v1), 2025-06-18
Supplement: Supplementary file 25 [file annotation_farmer_protests_3.xlsx]

## Sheet: Sheet1
Event Description	DO NOT FILL	Rising Production Costs	Opposition to EU Free-Trade Agreements	Environmental Regulations and Agricultural Standards	Bureaucratic Constraints	Opposition to Foreign Agricultural Imports	Subsidy Cuts	Climate and Natural Disaster Relief	Labor and Social Conditions	Solidarity Movements	Opposition to Renewable Energy Projects	Economic Struggles and Agricultural Livelihoods	Consumer Awareness Initiatives	Livestock and Animal Welfare Protests	Opposition to Synthetic Products	Infrastructure and Transport Policies	National and Local State Support	Fair Compensation and Market Practices	Miscellaneous Agriculture-Related Protests	Other	NOTE
farmers dumped meat outside a McDonald's restaurant in Freyming-Merlebach (Grand Est). The event was part of a nationwide farmers' demonstration movement called by FNSEA and JA against rising production costs, stricter environmental norms restricting the use of pesticides, foreign imports, and bureaucratic constraints.	DONE	1	0	1	1	1	0	0	0	0	0	0	0	0	0	0	0	0	0	0
around 20 farmers protested by driving their vehicles near the border crossing point in Nadlac, blocking some roads in protest of the government's reluctance to support farmers hit by weather events.	DONE	0	0	0	0	0	0	0	0	0	0	0	0	0	0	0	0	0	0	1
farmers with tractors participated in a motorcade in the Mercabarna area of El Prat de Llobregat (Cataluna). The event was part of a nationwide farmers' demonstration movement against the ratification of the EU's free-trade agreements until partner third countries comply with the EU's agricultural standards, and in favor of fair production prices for Spanish farmers, relief measures to offset the…	DONE	1	1	1	0	1	0	1	1	0	0	1	0	0	0	0	1	1	0	0
around 130 tractors rode through the streets of Forli (Emilia-Romagna), riding to the city's Portici area. From there, people with only a few tractors marched with flags and banners to the Prefecture in the city center. The event was part of a nationwide farmers' demonstration movement called by Agrarian Redemption against the government's plan to cut agricultural sector subsidies, the economic d…	DONE	0	0	1	0	0	1	0	1	0	0	1	0	1	0	0	0	0	0	0
farmers with around 20 tractors, called by ASAJA, COAG and UPA, participated in motorcade in Toledo (Castilla-La Mancha), driving at a slow pace, to demonstrate. The motorcade was followed by a distribution of products to citizens. The event was part of a nationwide farmers' demonstration movement against the ratification of the EU's free-trade agreements until partner third countries comply with…	DONE	1	1	1	0	1	0	1	1	0	0	1	0	0	0	0	1	1	0	0
farmers protesting over rising production costs, among other issues they said are pertinent to their survival, blocked the Kozani - Florina national road at Filotas for 90 minutes.	DONE	1	0	0	0	0	0	0	0	0	0	0	0	0	0	0	0	0	0	1
farmers blocked with their machines a highway near Wartkowice, protesting against what they see as a low state support to the national agriculture, including excessive bureaucracy and environmental restrictions, and against ongoing import of grains from Ukraine.	DONE	0	0	1	1	1	0	0	0	0	0	0	0	0	0	0	1	0	0	0
farmers gathered with their machines in Kumiala, protesting against what they see as a low state support to the national agriculture, including excessive bureaucracy and environmental restrictions, and against ongoing import of grains from Ukraine.	DONE	0	0	1	1	1	0	0	0	0	0	0	0	0	0	0	1	0	0	0
at the call of FNSEA and JA, around 15 farmers gathered with tractors in the Mescadiou area of Brest (Bretagne) to protest against the current farming regulations and to demand more financial support from the French state.	DONE	0	0	1	0	0	0	0	0	0	0	0	0	0	0	0	1	0	0	0
farmers driving about 45 tractors from the Epanomi blockade, protesting over rising production costs, among other issues, participated in a motorcade towards the airport of Thessaloniki, but police forces had already set up a blockade at the Plagiari junction preventing them from moving further.	DONE	1	0	0	0	0	0	0	0	0	0	0	0	0	0	0	0	0	1	1
between 20 and 30 farmers protested in Tervuren (Vlaanderen) against the recognition of a new national park that they feared would make their permits more difficult.	DONE	0	0	0	0	0	0	0	0	0	0	0	0	0	0	0	0	0	1	0
about 130 farmers and their supporters gathered for a rally in Neumarkt i.d. OPf. (Bayern). The event was part of a nationwide farmers' demonstration movement against planned agricultural subsidy cuts.	DONE	0	0	0	0	0	1	0	0	0	0	0	0	0	0	0	0	0	0	0
farmers gathered for a rally near Dinslaken (Nordrhein-Westfalen), protesting against the proposed reduction of tax bonuses for agricultural fuel. Associations of farmers organized gatherings and rides also at numerous other locations across the country.	DONE	0	0	0	0	0	1	0	0	0	0	0	0	0	0	0	0	0	0	0
farmers with 9 tractors participated in a motorcade in Tabara (Zamora, Castilla y Leon) along the N-631. The event was part of a nationwide farmers' demonstration movement called by ASAJA, COAG, and UPA against the ratification of the EU's free-trade agreements until partner third countries comply with the EU's agricultural standards, and in favor of fair production prices for Spanish farmers, re…	DONE	1	1	1	0	1	0	1	1	0	0	1	0	0	0	0	1	1	0	0
at the call of CP, around 200 farmers gathered outside the Prefecture in La Roche-sur-Yon (Pays de la Loire). The event was part of a nationwide farmers' demonstration movement against rising production costs, stricter environmental norms restricting the use of pesticides, foreign imports, and bureaucratic constraints.	DONE	1	0	1	1	1	0	0	0	0	0	0	0	0	0	0	0	0	0	0
farmers with more than 200 tractors participated in a motorcade in Guadalajara (Castilla-La Mancha). The event was part of a nationwide farmers' demonstration movement called by ASAJA, COAG, UPA and Agri-Food Cooperatives (Cooperativas Agro-alimentarias) against the ratification of the EU's free-trade agreements until partner third countries comply with the EU's agricultural standards, and in fav…	DONE	1	1	1	0	1	0	1	1	0	0	1	0	0	0	0	1	1	0	0
farmers with their machines gathered for a demonstrative ride across the Pardubice district, protesting against what they see as a low state support to the national agriculture. Rallies, rides and gatherings took place at other locations across the country as well.	DONE	0	0	0	0	0	0	0	0	0	0	0	0	0	0	0	1	0	0	0
several farmers set up a road blockade on the A54 highway in Salon-de-Provence (Provence-Alpes-Cote d'Azur). The event was part of a nationwide farmers' demonstration movement called by FNSEA and JA against rising production costs, stricter environmental norms restricting the use of pesticides, foreign imports, and bureaucratic constraints.	DONE	1	0	1	1	1	0	0	0	0	0	0	0	0	0	0	0	0	0	0
35 tractors demonstrated in Evergem (Vlaanderen). The local CD&V alderman for agriculture directed the parade. The event was part of a nationwide demonstration by farmers against EU agricultural regulations, their national government's nitrogen policy, a lack of consideration for their work, and low production prices.	DONE	0	0	1	0	0	0	0	1	0	0	1	0	0	0	0	1	1	0	0
at the call of the FNSEA and JA, almost 10 dairy farmers gathered on tractors at the Lactalis plant in Craon (Pays de la Loire) to demand an increase in the price of milk.	DONE	0	0	0	0	0	0	0	0	0	0	1	0	0	0	0	0	1	0	0
tens of farmers and truckers drove their trucks and vehicles in Craiova, condemning the high insurance prices, the high taxes, and the influx of Ukrainian cereals and trucks.	DONE	0	0	0	0	1	0	0	0	0	0	1	0	0	0	0	1	1	0	0
farmers blocked a border crossing point near Hrubieszow, protesting against ongoing imports of grains from Ukraine and also against what they see as an excessive bureaucracy related to the so-called Green Deal of the European Union.	DONE	0	0	1	1	0	0	0	0	0	0	0	0	0	0	0	0	0	0	0
farmers blocked a border crossing point between Poland and Ukraine near Hrebenne, protesting against ongoing imports of Ukrainian grains to the EU and demanding higher support to the national agriculture.	DONE	0	0	0	0	1	0	0	0	0	0	0	0	0	0	0	1	0	0	0
around 350 farmers represented by IFA with their vehicles held a convoy protest through Waterford (Waterford City and County) to demand support from the local council. Farmers are protesting across the EU about regulations, income pressure, and bureaucracy.	DONE	0	1	1	0	0	0	0	0	0	0	1	0	0	0	0	1	0	0	0
farmers with tractors participated in a motorcade in La Carolina (Andalucia), blocking the A4 highway. The event was part of a nationwide farmers' demonstration movement called by the 6F Platform (plataforma de agricultores independientes 6-F) against the ratification of the EU's free-trade agreements until partner third countries comply with the EU's agricultural standards, and in favor of fair …	DONE	1	1	1	0	1	0	1	1	0	0	1	0	0	0	0	1	1	0	0
several hundred farmers and other activists gathered with their vehicles for a demonstrative ride in Unterstadion (Alb-Donau-Kreis). The event was part of a nationwide farmers' demonstration movement against planned agricultural subsidy cuts.	DONE	0	0	0	0	0	1	0	0	0	0	0	0	0	0	0	0	0	0	0
farmers blocked a highway near Glogow, protesting against ongoing imports of Ukrainian grains to the EU and demanding higher support to the national agriculture.	DONE	0	0	0	0	1	0	0	0	0	0	0	0	0	0	0	1	0	0	0
farmers gathered with their vehicles for a demonstrative blockade of a highway exit near Schleusingen (Thuringen). The event was part of a nationwide farmers' demonstration movement against planned agricultural subsidy cuts.	DONE	0	0	0	0	0	1	0	0	0	0	0	0	0	0	0	0	0	0	0
farmers gathered on the road (in the direction of Halle) in Gusten (Sachsen-Anhalt) to demonstrate. The event was part of a nationwide farmers' demonstration movement against planned agricultural subsidy cuts.	DONE	0	0	0	0	0	1	0	0	0	0	0	0	0	0	0	0	0	0	0
farmers gathered with their machines near Olsztyn, protesting against what they see as a low state support to the national agriculture, including excessive bureaucracy and environmental restrictions, and against ongoing import of grains from Ukraine.	DONE	0	0	1	1	1	0	0	0	0	0	0	0	0	0	0	0	0	0	0
farmers dumped manure outside the Prefecture in Avallon (Bourgogne-Franche-Comte). The event was part of a nationwide farmers' demonstration movement called by FNSEA and JA against rising production costs, stricter environmental norms restricting the use of pesticides, foreign imports, and bureaucratic constraints.	DONE	1	0	1	1	1	0	0	0	0	0	0	0	0	0	0	0	0	0	0
at the call of FNSEA and JA, farmers gathered outside the Chamber of Agriculture in Nantes (Pays de la Loire) to demand swifter payment of European subsidies.	DONE	0	0	0	0	0	1	0	0	0	0	0	0	0	0	0	0	0	0	0
around 40 farmers staged a protest in Diepholz (LNiedersachsen), protesting against the government's plans to end subsidies for agricultural diesel, introduce vehicle taxes on tractors and machinery, and voiced opposition to the truck toll and CO2 tax.	DONE	0	0	0	0	0	1	0	0	0	0	1	0	0	0	1	1	0	0	0
farmers with hundreds of tractors participated in a motorcade from La Ballesta to Cordoba (both Andalucia), blocking the N432 near Fuente de Piedra during their procession. The event was part of a nationwide farmers' demonstration movement, called by UdU on that day, against the ratification of the EU's free-trade agreements until partner third countries comply with the EU's agricultural standard…	DONE	1	1	1	0	1	0	1	1	0	0	1	0	0	0	0	1	1	0	0
at the call of CP, beekeepers set up beehives and gathered at Bellecour Square in Lyon (Auvergne-Rhone-Alpes) to protest against unfair competition from foreign companies.	DONE	0	0	0	0	1	0	0	0	0	0	0	0	0	0	0	0	0	0	0
farmers with their vehicles highways near Lodz, protesting against what they see as a too low state support to the national agriculture and also criticizing ongoing imports of grains from Ukraine to the EU.	DONE	0	0	0	0	1	0	0	0	0	0	0	0	0	0	0	1	0	0	0
more than 600 people with more than 200 tractors, participated in a protest on a field between Sielmingen (Esslingen, Baden-Wurttemberg) and Harthausen with a warning fire. The event was part of a nationwide farmers' demonstration movement against planned agricultural subsidy cuts.	DONE	0	0	0	0	0	1	0	0	0	0	0	0	0	0	0	0	0	0	0
farmers protesting over rising production costs, among other issues they said are pertinent to their survival, blocked the highway at the Nea Moudania junction for 2 hours.	DONE	1	0	0	0	0	0	0	0	0	0	0	0	0	0	0	0	0	1	1
farmers staged a demonstration in Pescara (Abruzzo) to protest against the EU's agricultural policies. Demonstrators also protested against high production costs, subsidy cuts to their sector, laboratory-made meat, flour produced using insects, and regulations on imported agricultural products, among other things. An FdI regional councilor attended the demonstration.	DONE	1	1	1	0	1	1	0	0	0	0	0	0	0	1	0	0	0	0	0
about 300 farmers staged a picket in Barletta (Puglia) with their tractors to protest against the import of wheat from abroad. The event was part of a nationwide farmers' demonstration movement called 'Free Farmers Movement' (Movimento Liberi Agricoltori) against the government's plan to cut agricultural sector subsidies, the economic difficulties of the sector, and the EU policies on agriculture…	DONE	0	1	1	0	1	1	0	0	0	0	1	0	1	0	0	0	0	0	0
farmers staged a protest in Jarmen (Mecklenburg-Vorpommern), by blocking the highway entrance with their tractors. The event was part of a nationwide demonstration movement called by farmers to denounce the government's plan to cut agricultural sector subsidies.	DONE	0	0	0	0	0	1	0	0	0	0	0	0	0	0	0	0	0	0	0
people, including farmers with 55 tractors, as well as some few truck drivers, gathered in Karlsruhe (Baden-Wurttemberg), some reaching it as convoys from Bruchsal through Stutensee, as well as from Heidelberg, to demonstrate. The event was part of a nationwide farmers' demonstration movement against planned agricultural subsidy cuts.	DONE	0	0	0	0	0	1	0	0	0	0	0	0	0	0	0	0	0	0	0
around 1,250 truck drivers, freight contractors, craftsmen, and farmers staged a protest near the Berlin Victory Column in Berlin - Mitte (Berlin), advocating against the policies of the German federal government, expressing grievances related to their livelihoods and dissatisfaction with current conditions.	DONE	0	0	0	0	0	0	0	1	0	0	1	0	0	0	0	0	0	0	0
nearly 800 farmers with tractors participated in a motorcade in and around Soria (Castilla y Leon), blocking traffic on several roads near the town. The event was part of a nationwide farmers' demonstration movement, called by UdU on that day, against the ratification of the EU's free-trade agreements until partner third countries comply with the EU's agricultural standards, and in favor of fair …	DONE	1	1	1	0	1	0	1	1	0	0	1	0	0	0	0	1	1	0	0
farmers blocked access to a Grand Frais supermarket in Orange (Provence-Alpes-Cote d'Azur). The event was part of a nationwide farmers' demonstration movement called by FNSEA and JA against rising production costs, stricter environmental norms restricting the use of pesticides, foreign imports, and bureaucratic constraints.	DONE	1	0	1	1	1	0	0	0	0	0	0	0	0	0	0	0	0	0	0
farmers protesting over rising production costs, among other issues they said are pertinent to their survival, rallied at Kastro in Viotia. The general secretary of KKE visited the roadblock.	DONE	1	0	0	0	0	0	0	0	0	0	0	0	0	0	0	0	0	1	1
at the national call of several organization affiliates, including from FIDL, LDH, CGT, LFI, Oxfam, UNSA, UNEF, Greenpeace, CFDT, CP, La Cimade, SM, RE, PCF, NUPES, MRAP, SOS Racism, FSU, and Attac, as well as several civil society figures, over 2,500 people, including MFPF affiliates, gathered in Bordeaux (Nouvelle-Aquitaine) to call on President Emmanuel Macron not to sign into law the new immi…	DONE	0	0	0	0	0	0	0	0	1	0	0	0	0	0	0	0	0	0	0
at the national call of several organization affiliates, including from FIDL, LDH, CGT, LFI, Oxfam, UNSA, UNEF, Greenpeace, CFDT, CP, La Cimade, SM, RE, PCF, NUPES, MRAP, SOS Racism, FSU, and Attac, as well as several civil society figures, around 300 people gathered in Auxerre (Bourgogne-Franche-Comte) to call on President Emmanuel Macron not to sign into law the new immigration bill, which they…	DONE	0	0	0	0	0	0	0	0	1	0	0	0	0	0	0	0	0	0	0
farmers gathered with their machines for a rally in Opole, protesting against what they see as a low state support to the national agriculture, including excessive bureaucracy and environmental restrictions, and against ongoing import of grains from Ukraine.	DONE	0	0	1	1	1	0	0	0	0	0	0	0	0	0	0	1	0	0	0
around 400 farmers with 100 tractors, called by Platform for the Defense of the Leonese Countryside (Plataforma Defensa del Campo Leones), held a protest in Villadangos del Paramo (Castilla y Leon) against the police charges during a recent event in Adaneros. The event was part of a nationwide farmers' demonstration movement against the ratification of the EU's free-trade agreements until partner…	DONE	1	1	1	0	1	0	1	1	0	0	1	0	0	0	0	1	1	0	0
farmers with around 2,000 tractors participated in a motorcade in Barcelona and gathering at Plaza Sant Jaume in Barcelona - Ciutat Vella (Cataluna). The event was part of a nationwide farmers' demonstration movement called by UdU against the ratification of the EU's free-trade agreements until partner third countries comply with the EU's agricultural standards, and in favor of fair production pr…	DONE	1	1	1	0	1	0	1	1	0	0	1	0	0	0	0	1	1	0	0
farmers with several dozen vehicles blocked a highway near Piaski, protesting against ongoing imports of Ukrainian grains to the EU and demanding higher support to the national agriculture.	DONE	0	0	0	0	1	0	0	0	0	0	0	0	0	0	0	1	0	0	0
around 30 farmers drove their vehicles from Iernut, Mures, in protest to the high insurance fees, high fuel price, and high operating costs due to taxes.	DONE	0	0	0	0	0	0	0	0	0	0	0	0	0	0	0	1	0	0	0
farmers blocked a highway near Kwidzyn, protesting against ongoing imports of Ukrainian grains to the EU and demanding higher support to the national agriculture.	DONE	0	0	0	0	1	0	0	0	0	0	0	0	0	0	0	1	0	0	0
at the call of the JA, farmers staged a blockade at the Leclerc hypermarket in Ibos (Occitanie) to denounce non-compliance with the Agriculture and Food law. The event was part of a nationwide farmers' demonstration movement against rising production costs, stricter environmental norms restricting the use of pesticides, foreign imports, and bureaucratic constraints.	DONE	1	0	1	1	1	0	0	0	0	0	0	0	0	0	0	0	0	0	0
farmers with their vehicles gathered for a rally in Kaluszyn, protesting against what they see as a too low state support to the national agriculture and also criticizing ongoing imports of grains from Ukraine to the EU.	DONE	0	0	0	0	1	0	0	0	0	0	0	0	0	0	0	1	0	0	0
farmers organized a demonstrative ride to Votice. The gathering was a part of nation-wide protest against persisting problems in the agricultural sectors, including the so-called Green Deal restrictions or the ongoing imports of grain from Ukraine.	DONE	0	1	0	0	1	0	0	0	0	0	0	0	0	0	0	0	0	0	0
at the call of CP, around 20 farmers gathered inside a Leclerc supermarket and removed meat from New Zealand from the shelves in Oloron (Nouvelle-Aquitaine) to protest against unfair competition from abroad.	DONE	0	0	0	0	1	0	0	0	0	0	0	0	0	0	0	0	0	0	0
farmers blocked with their machines a highway near Zawiercie, protesting against what they see as a low state support to the national agriculture, including excessive bureaucracy and environmental restrictions, and against ongoing import of grains from Ukraine.	DONE	0	0	1	1	1	0	0	0	0	0	0	0	0	0	0	1	0	0	0
farmers staged a protest in Burkau (Sachsen), by blocking the highway entrance with their tractors. The event was part of a nationwide demonstration movement called by farmers to denounce the government's plan to cut agricultural sector subsidies.	DONE	0	0	0	0	0	1	0	0	0	0	0	0	0	0	0	0	0	0	0
farmers with around 80 tractors staged a protest in Dobeln (Sachsen), advocating against the policies of the German federal government, expressing grievances related to their livelihoods and dissatisfaction with current conditions.	DONE	0	0	0	0	0	0	0	1	0	0	1	0	0	0	0	0	0	0	0
farmers from Policoro, Tursi, Scanzano Jonico, Bernalda, Pisticci, and Montalbano gathered in Nova Siri (Basilicata) and then blocked the state road 106 nearby to demonstrate. The event was part of a nationwide farmers' demonstration movement against the government's plan to cut agricultural sector subsidies, the economic difficulties of the sector, and the EU policies regarding agriculture and l…	DONE	0	1	1	0	0	1	0	0	0	0	1	0	1	0	0	0	0	0	0
farmers and agricultural workers gathered in Montana to protest against what they claim are unfair EU policies toward farmers, livestock breeders and grain producers, especially with regard to grain import policies toward Ukraine which they claim is undercutting their profits. Protests were held in around 80 locations all over Bulgaria.	DONE	0	1	1	0	1	0	0	0	0	0	0	0	1	0	0	0	1	0	0
farmers blocked the road in Kuzmin with their tractors, demanding urgent excise tax exemptions on fuel from the government, which are necessary to continue their work and existence.	DONE	0	0	0	0	0	0	0	0	0	0	1	0	0	0	0	1	0	0	0
farmers protesting over rising production costs, among other issues they said are pertinent to their survival, set up roadblocks on the Egnatia highway at Serres.	DONE	1	0	0	0	0	0	0	0	0	0	0	0	0	0	0	0	0	0	1
an unknown number of farmers, including FJA members, blocked the highways E429 and E19 near the exits around Halle (Vlaanderen) to demonstrate. The event was part of a nationwide demonstration by farmers against EU agricultural regulations, their national government's nitrogen policy, a lack of consideration for their work, and low production prices.	DONE	0	1	1	0	0	0	0	1	0	0	0	0	0	0	0	1	1	0	0
farmers blocked a border crossing point between Poland and Ukraine near Dolhobyczow, protesting against ongoing imports of Ukrainian grains to the EU and demanding higher support to the national agriculture.	DONE	0	0	0	0	1	0	0	0	0	0	0	0	0	0	0	1	0	0	0
farmers set up a road blockade on the A10 highway in Chennevieres-les-Louvres (Ile-de-France). The event was part of a nationwide farmers' demonstration movement called by FNSEA and JA against rising production costs, stricter environmental norms restricting the use of pesticides, foreign imports, and bureaucratic constraints.	DONE	1	0	1	1	1	0	0	0	0	0	0	0	0	0	0	0	0	0	0
several dozens of farmers with tractors participated in a motorcade in Cambrils (Cataluna), blocking the AP-7, to protest against the construction of the Hard Rock macroproject. They also protested the next day (coded separately).	DONE	0	0	0	0	0	0	0	0	0	0	0	0	0	0	0	0	0	0	1
farmers with about 75 tractors protested on the B8 road near Brauersdorf (Bayern) and slowed down traffic. The event was part of a nationwide farmers' demonstration movement against several agricultural policies of the federal government, including planned agricultural subsidy cuts.	DONE	0	0	0	0	0	1	0	0	0	0	0	0	0	0	0	1	0	0	0
farmers with their vehicles blocked highways leading to Bialystok at several locations of the city suburbs, protesting against what they see as a too low state support to the national agriculture and also criticizing ongoing imports of grains from Ukraine to the EU.	DONE	0	0	0	0	1	0	0	0	0	0	0	0	0	0	0	1	0	0	0
several dozen farmers gathered with their machines in Bogucin, protesting against the proposed extension of agricultural trade with Ukraine and demanding higher institutional and financial support from their government.	DONE	0	0	0	0	1	0	0	0	0	0	0	0	0	0	0	1	0	0	0
at the call of the Spontaneous Committee of Farmers (COSPA - Comitato Spontaneo Agricoltori), 300 farmers with 200 tractors rode from Fossacesia (Abruzzo) to Atessa (Abruzzo). The event was part of a nationwide farmers' demonstration movement called by Agrarian Redemption against the government's plan to cut agricultural sector subsidies, the economic difficulties of the sector, and the EU polici…	DONE	0	0	1	0	0	1	0	0	0	0	1	0	1	0	0	0	0	0	0
in the morning, farmers protested and blocked the harbor in Worms (Rheinland-Pfalz). In the afternoon, farmers with about 40 tractors protested with a motorcade through the city, gathering on Festplatz. Both events were part of a nationwide farmers' demonstration movement against planned agricultural subsidy cuts.	DONE	0	0	0	0	0	1	0	0	0	0	0	0	0	0	0	0	0	0	0
farmers and artisans rallied with their tractors and cars in Oldenburg, protesting against the government's cost-cutting plans for farmers, specifically regarding Agrardiesel, tolls, and vehicle taxes.	DONE	0	0	0	0	0	1	0	0	0	0	0	0	0	0	0	0	0	0	0
farmers protested on the A8 highway ramp at connection point 92b in Neubiberg (Bayern). The event was part of a nationwide farmers' demonstration movement against several agricultural policies of the federal government, including planned agricultural subsidy cuts.	DONE	0	0	0	0	0	1	0	0	0	0	0	0	0	0	0	1	0	0	0
about 500 farmers, including members of AgroUnia, gathered with their machines for a demonstrative ride in Borki, protesting against what they see as a low state support to the national agriculture, including excessive bureaucracy and environmental restrictions, and against ongoing import of grains from Ukraine.	DONE	0	0	1	1	1	0	0	0	0	0	0	0	0	0	0	1	0	0	0
at the call of CR, around 50 farmers drove at a slow pace inside the city center and gathered outside the Chamber of Agriculture in Blois (Centre-Val de Loire) to demand swifter payment of European subsidies and more state support for farmers. The event happened as the MoDem party was hosting an event in Blois, where Prime Minister Gabriel Attal was giving a speech.	DONE	0	0	0	0	0	1	0	0	0	0	0	0	0	0	0	1	0	0	0
farmers protested and blocked the A2 highway ramp 'Konigslutter' and the A39 highway ramp 'Scheppau' in Konigslutter am Elm (Helmstedt, Niedersachsen). The event was part of a nationwide farmers' demonstration movement against planned agricultural subsidy cuts.	DONE	0	0	0	0	0	1	0	0	0	0	0	0	0	0	0	0	0	0	0
farmers of Trikala demonstrated for a third day at Zarkos over high production costs and demanded better compensation payments, among other issues, five months after the devastating storm Daniel.	DONE	0	0	0	0	0	0	1	0	0	0	0	0	0	0	0	0	0	1	1
about 20 farmers protested in front of the Prime Minister's home in Brakel (Vlaanderen) against new agricultural regulations. The event was part of a nationwide farmers' demonstration movement against EU agricultural regulations, their national government's nitrogen policy, a lack of consideration for their work, and low production prices.	DONE	0	1	1	0	0	0	0	1	0	0	0	0	0	0	0	1	1	0	0
farmers with around 8 tractors protested in Weimar (Thuringen). The event was part of a nationwide farmers' demonstration movement against several agricultural policies of the federal government, including planned agricultural subsidy cuts.	DONE	0	0	0	0	0	1	0	0	0	0	0	0	0	0	0	1	0	0	0
farmers gathered in Selestat (Grand Est). The event was part of a nationwide farmers' demonstration movement called by FNSEA and JA against rising production costs, stricter environmental norms restricting the use of pesticides, foreign imports, and bureaucratic constraints.	DONE	1	0	1	1	1	0	0	0	0	0	0	0	0	0	0	0	0	0	0
around 300 people, including CR supporters, gathered in Agen (Nouvelle-Aquitaine) to express solidarity with farmers protesting against rising production costs, stricter environmental norms restricting the use of pesticides, foreign imports, and bureaucratic constraints.	DONE	1	0	1	1	1	0	0	0	1	0	0	0	0	0	0	0	0	0	0
farmers blocked access to a logistical platform in Avallon (Bourgogne-Franche-Comte). The event was part of a nationwide farmers' demonstration movement called by FNSEA and JA against rising production costs, stricter environmental norms restricting the use of pesticides, foreign imports, and bureaucratic constraints.	DONE	1	0	1	1	1	0	0	0	0	0	0	0	0	0	0	0	0	0	0
farmers blocked exits from Gniezno, protesting against ongoing imports of grains from Ukraine and also against what they see as an excessive bureaucracy related to the so-called Green Deal of the European Union.	DONE	0	1	1	1	1	0	0	0	0	0	0	0	0	0	0	0	0	0	0
farmers set up a road blockade on the A31 highway in Selongey (Bourgogne-Franche-Comte). The event was part of a nationwide farmers' demonstration movement called by FNSEA and JA against rising production costs, stricter environmental norms restricting the use of pesticides, foreign imports, and bureaucratic constraints.	DONE	1	0	1	1	1	0	0	0	0	0	0	0	0	0	0	0	0	0	0
around 1000 farmers and forest workers protested in front of the Government building in Riga, Latvia, calling for fair compensation after taking forest lands under nature protection. Additionally, six heavy agricultural machinery were parked in front of the Government building and an installation was erected in the form of a chair with a broken leg and the inscription 'Come to your senses! Fall!'.	DONE	0	0	0	0	0	0	0	0	0	0	0	0	0	0	0	0	0	1	0
farmers with about 150 machines and other vehicles gathered in Banie, protesting against the proposed extension of agricultural trade with Ukraine and demanding higher institutional and financial support from their government.	DONE	0	0	0	0	1	0	0	0	0	0	1	0	0	0	0	1	0	0	0
several farmers set up a road blockade on the A51 highway in La Saulce (Provence-Alpes-Cote d'Azur). The event was part of a nationwide farmers' demonstration movement called by FNSEA and JA against rising production costs, stricter environmental norms restricting the use of pesticides, foreign imports, and bureaucratic constraints.	DONE	1	0	1	1	1	0	0	0	0	0	0	0	0	0	0	0	0	0	0
farmers with 6 tractors, including Luxembourg farmers, protested at the border crossing between Nennig (Rheinland-Pfalz) and Remich (Luxembourg) and slowed down traffic. The event was part of a nationwide farmers' demonstration movement against several agricultural policies of the federal government, including planned agricultural subsidy cuts.	DONE	0	0	0	0	0	1	0	0	0	0	0	0	0	0	0	1	0	0	0
farmers of Thessaly and representatives of farmers from across the country rallied at the monument marking the Kileler Uprising to honor the Thessalian farmers, who lost their lives during the revolt, and to demand solutions to their problems, which they said was a matter of survival.	DONE	0	0	0	0	0	0	0	1	0	0	1	0	0	0	0	1	0	0	0
farmers and agricultural workers gathered in Shumen to protest against what they claim are unfair EU policies toward farmers, livestock breeders and grain producers, especially with regard to grain import policies toward Ukraine which they claim is undercutting their profits. Protests were held in around 80 locations all over Bulgaria.	DONE	0	1	0	0	1	0	0	0	0	0	1	0	1	0	0	0	1	0	0
an unknown number of farmers blocked the distribution center of the food chain Delhaize in Ninove (Vlaanderen) to demonstrate. The event was part of a nationwide demonstration by farmers against EU agricultural regulations, their national government's nitrogen policy, a lack of consideration for their work, and low production prices.	DONE	0	1	1	0	0	0	0	1	0	0	0	0	0	0	0	1	0	0	0
farmers set up a road blockade on the roundabout on the RD813 road in Castelculier (Nouvelle-Aquitaine). The event was part of a nationwide farmers' demonstration movement called by FNSEA and JA against rising production costs, stricter environmental norms restricting the use of pesticides, foreign imports, and bureaucratic constraints.	DONE	1	0	1	1	1	0	0	0	0	0	0	0	0	0	0	0	0	0	0
farmers with tractors participated in a motorcade on the A-1605 road in Roda de Isabena (Aragon). The event was part of a nationwide farmers' demonstration movement against the ratification of the EU's free-trade agreements until partner third countries comply with the EU's agricultural standards, and in favor of fair production prices for Spanish farmers, relief measures to offset the consequenc…	DONE	1	1	1	0	1	0	1	1	0	0	1	0	0	0	0	1	1	0	0
farmers with their vehicles blocked streets across the Bartoszyce district, protesting against what they see as a too low state support to the national agriculture and also criticizing ongoing imports of grains from Ukraine to the EU.	DONE	0	0	0	0	1	0	0	0	0	0	0	0	0	0	0	1	0	0	0
1,500 farmers staged a protest in Roma - City Center (Lazio) in various locations: Colosseo, Campidoglio, Circo Massimo and Palazzo Chigi. Alternative Agriculture Confederation for food sovereignty (Altragricoltura Confederazione per la sovranita alimentare) and Productive People (Popolo produttivo) organized the protest. The event is part of a nationwide farmers' demonstration movement called by…	DONE	0	1	1	0	0	1	0	0	0	0	1	0	1	0	0	0	0	0	0
farmers blocked a highway near Nowy Dwor Gdanski, protesting against ongoing imports of grains from Ukraine and also against what they see as an excessive bureaucracy related to the so-called Green Deal of the European Union.	DONE	0	1	1	1	1	0	0	0	0	0	0	0	0	0	0	0	0	0	0
farmers with about 150 vehicles blocked streets of Krasnystaw, protesting against what they see as a too low state support to the national agriculture and also criticizing ongoing imports of grains from Ukraine to the EU.	DONE	0	0	0	0	1	0	0	0	0	0	0	0	0	0	0	1	0	0	0
farmers and breeders gathered with their tractors in Cagliari (Sardegna). The event was part of a nationwide farmers' demonstration movement against the government's plan to cut agricultural sector subsidies, the economic difficulties of the sector, and the EU policies on agriculture and livestock.	DONE	0	1	1	0	0	1	0	0	0	0	1	0	1	0	0	0	0	0	0
farmers set up a road blockade on the A79 highway in Molinet (Auvergne-Rhone-Alpes). The event was part of a nationwide farmers' demonstration movement called by FNSEA and JA against rising production costs, stricter environmental norms restricting the use of pesticides, foreign imports, and bureaucratic constraints.	DONE	1	0	1	1	1	0	0	0	0	0	0	0	0	0	0	0	0	0	0
farmers blocked with their machines a highway near Katowice, protesting against what they see as a low state support to the national agriculture, including excessive bureaucracy and environmental restrictions, and against ongoing import of grains from Ukraine.	DONE	0	0	1	1	1	0	0	0	0	0	0	0	0	0	0	1	0	0	0
farmers with around 50 tractors protested in Mogadouro (Braganca) to demand better conditions and more financial support from the government. The event was part of a larger protest movement of farmers across European countries denouncing the EU's agricultural policy.	DONE	0	1	1	0	0	0	0	1	0	0	1	0	0	0	0	1	0	0	0
farmers with tractors participated in a motorcade in Tarancon (Castilla-La Mancha), blocking the A-3 road. The event was part of a nationwide farmers' demonstration movement against the ratification of the EU's free-trade agreements until partner third countries comply with the EU's agricultural standards, and in favor of fair production prices for Spanish farmers, relief measures to offset the c…	DONE	0	1	1	0	0	1	0	0	0	0	1	0	1	0	0	0	0	0	0
farmers protested at the A2 highway ramp in Rennau (Niedersachsen) and blocked the road in both directions. The event was part of a nationwide farmers' demonstration movement against several agricultural policies of the federal government, including planned agricultural subsidy cuts.	DONE	0	0	0	0	0	1	0	0	0	0	0	0	0	0	0	1	0	0	0
about 50 farmers gathered for a demonstrative ride with their machines through Schweinfurt (Bayern), protesting against a proposed end of state subventions of fuels for the agricultural sector.	DONE	0	0	0	0	0	1	0	0	0	0	0	0	0	0	0	0	0	0	0
farmers again blocked a highway near Chojnice, protesting against ongoing import of Ukrainian grains into the EU and against restrictions related to the so-called Green Deal.	DONE	0	1	1	0	1	0	0	0	0	0	0	0	0	0	0	0	0	0	0
farmers gathered for a rally in Dingolfing (Bayern), protesting against the proposed reduction of tax bonuses for agricultural fuel. Associations of farmers organized gatherings and rides also at numerous other locations across the country.	DONE	0	0	0	0	0	1	0	0	0	0	0	0	0	0	0	0	0	0	0
more than 300 farmers and stockbreeders participated in a motorcade, driving at a slow pace through the streets of Badajoz (Extremadura), to demonstrate against the fines imposed on farmers for their participation in blockades. The event was part of a nationwide farmers' demonstration movement against the ratification of the EU's free-trade agreements until partner third countries comply with the…	DONE	0	1	1	0	0	1	0	0	0	0	1	0	1	0	0	0	0	0	0
about 50 farmers protested in Winschoten (Groningen) against new agricultural regulations. Some members of the Farmers Defence Force were present, despite the event not being organized by the group. The event was part of a nationwide farmers' demonstration movement against EU agricultural regulations, their national government's nitrogen policy, a lack of consideration for their work, and low pro…	DONE	0	1	1	0	0	0	0	1	0	0	0	0	0	0	0	1	1	0	0
people held a protest in Bilbao (Bizkaia, Pais Vasco) to advocate for gender equality and women's rights. The protest was summoned by LAB, ELA, Steilas, ESK, CGT, EHNE, and Etxalde.	DONE	0	0	0	0	0	0	0	0	1	0	0	0	0	0	0	0	0	0	1
about 5,000 farmers took part in a demonstrative ride with their vehicles and gathered for a rally in Nurnberg (Brandenburg). The event was part of a nationwide farmers' demonstration movement against planned agricultural subsidy cuts.	DONE	0	0	0	0	0	1	0	0	0	0	0	0	0	0	0	0	0	0	0
farmers blocked roads around Bielsk Podlaski, protesting against ongoing imports of Ukrainian grains to the EU and demanding higher support to the national agriculture.	DONE	0	0	0	0	1	0	0	0	0	0	0	0	0	0	0	1	0	0	0
250 farmers staged a protest in Obrigheim (Baden-Wurttemberg), advocating against the policies of the German federal government, expressing grievances related to their livelihoods and dissatisfaction with current conditions.	DONE	0	0	0	0	0	0	0	1	0	0	1	0	0	0	0	1	0	0	0
farmers coming from Pais Vasco and France with hundreds of tractors participated in a motorcade, driving at slow pace through the AP8 road near Irun (Pais Vasco), blocking the border. The event was part of a nationwide farmers' demonstration movement against the ratification of the EU's free-trade agreements until partner third countries comply with the EU's agricultural standards, and in favor o…	DONE	0	1	1	0	0	1	0	0	0	0	1	0	1	0	0	0	0	0	0
unionized truck drivers for the 39th day blocked with their vehicles the border crossing point with Ukraine in Korczowa. They were condemning allegedly unfair conditions for Ukrainian transport and trade companies and demanded stronger state oversight. Unionized farmers supported them, voicing similar demands.	DONE	0	0	0	0	1	0	0	0	0	0	0	0	0	0	1	1	0	0	0
farmers set up a road blockade on the A9 highway in Castelsarrasin (Occitanie). The event was part of a nationwide farmers' demonstration movement called by FNSEA and JA against rising production costs, stricter environmental norms restricting the use of pesticides, foreign imports, and bureaucratic constraints.	DONE	1	0	1	1	1	0	0	0	0	0	0	0	0	0	0	0	0	0	0
farmers with their vehicles organized demonstrative rides across the Pisek district. The gathering was a part of nation-wide protest against persisting problems in the agricultural sectors, including the so-called Green Deal restrictions or the ongoing imports of grain from Ukraine.	DONE	0	1	1	0	1	0	0	0	0	0	0	0	0	0	0	0	0	0	0
farmers set up a road blockade in Linas (Ile-de-France). The event was part of a nationwide farmers' demonstration movement called by FNSEA and JA against rising production costs, stricter environmental norms restricting the use of pesticides, foreign imports, and bureaucratic constraints.	DONE	1	0	1	1	1	0	0	0	0	0	0	0	0	0	0	0	0	0	0
5 farmers gathered outside a Super U supermarket in Conde-sur-Sarthe (Normandie) to demand an increase in the price of milk. The event was part of a nationwide farmers' demonstration movement called by FNSEA and JA against rising production costs, stricter environmental norms restricting the use of pesticides, foreign imports, and bureaucratic constraints.	DONE	1	0	1	1	1	0	0	0	0	0	0	0	0	0	0	0	0	0	0
at the national call of several organization affiliates, including from FIDL, LDH, CGT, LFI, Oxfam, UNSA, UNEF, Greenpeace, CFDT, CP, La Cimade, SM, RE, PCF, NUPES, MRAP, SOS Racism, FSU, and Attac, as well as several civil society figures, around 1,500 people, including an LE national deputy, gathered in Jean-Jaures Square in Tours (Centre-Val de Loire) to call on President Emmanuel Macron not t…	DONE	0	0	0	0	0	0	0	0	1	0	0	0	0	0	0	0	0	0	1
an unknown number of farmers with tractors blocked access to the supermarket company Delhaize in Marche-en-Famenne (Wallonie) to protest against the import of specific agricultural products from abroad. The event was part of a nationwide demonstration by farmers against EU agricultural regulations, their national government's nitrogen policy, a lack of consideration for their work, and low produc…	DONE	0	1	1	0	0	0	0	1	0	0	0	0	0	0	0	1	1	0	0
at the national call of several organization affiliates, including from FIDL, LDH, CGT, LFI, Oxfam, UNSA, UNEF, Greenpeace, CFDT, CP, La Cimade, SM, RE, PCF, NUPES, MRAP, SOS Racism, FSU, and Attac, as well as several civil society figures, nearly 100 people, including members of the Senonese collective supporting exiles (Collectif senonais de soutien aux exile(e)s), gathered in Sens (Bourgogne-F…	DONE	0	0	0	0	0	0	0	0	1	0	0	0	0	0	0	0	0	0	1
more than 80 people gathered with their tractors to protest with a warning fire in Schliersee (Miesbach, Bayern). The event was part of a nationwide farmers' demonstration movement against planned agricultural subsidy cuts.	DONE	0	0	0	0	0	1	0	0	0	0	0	0	0	0	0	0	0	0	0
farmers set up a road blockade on the D994 road in Somme-Vesle (Grand Est). The event was part of a nationwide farmers' demonstration movement called by FNSEA and JA against rising production costs, stricter environmental norms restricting the use of pesticides, foreign imports, and bureaucratic constraints.	DONE	1	0	1	1	1	0	0	0	0	0	0	0	0	0	0	0	0	0	0
farmers with their tractors staged pickets in San Ferdinando di Puglia (Puglia) blocking traffic near the exits for the nearby municipalities of Canosa, Barletta, Cerignola, and Margherita di Savoia. The event was part of a nationwide farmers' demonstration movement against the government's plan to cut agricultural sector subsidies, the economic difficulties of the sector, and the EU policies on …	DONE	0	1	1	0	0	1	0	0	0	0	1	0	1	0	0	0	0	0	0
several farmers blocked access to the motorway in Strasburg (Mecklenburg-Vorpommern) to demonstrate. The event was part of a nationwide farmers' demonstration movement against, among other things, planned agricultural subsidy cuts.	DONE	0	0	0	0	0	1	0	0	0	0	0	0	0	0	0	1	0	0	0
at the call of CR, farmers set up a road blockade on the RT10 road in Linguizzetta (Corse). The event was part of a nationwide farmers' demonstration movement against rising production costs, stricter environmental norms restricting the use of pesticides, foreign imports, and bureaucratic constraints.	DONE	1	0	1	1	1	0	0	0	0	0	0	0	0	0	0	0	0	0	0
an unknown number of farmers organized a blockade on the highway N51 in Quievrain (Wallonie) to demonstrate. The event was part of a nationwide demonstration by farmers against EU agricultural regulations, their national government's nitrogen policy, a lack of consideration for their work, and low production prices.	DONE	0	1	1	0	0	0	0	0	0	0	0	0	0	0	0	1	1	0	0
around 80 farmers, County Administrator Johann Wimberg (CDU) and District Administrator Ansgar Meyer, participated in a protest on a field near the road B213 near Borkhorn (Niedersachsen) among other reasons against the expansion of the B213. The event was part of a nationwide farmers' demonstration movement against several agricultural policies of the federal government, including planned agricu…	DONE	0	0	0	0	0	1	0	0	0	0	0	0	0	0	0	1	0	0	0
farmers gathered outside a tax center in Lormont (Nouvelle-Aquitaine). The event was part of a nationwide farmers' demonstration movement called by FNSEA and JA against rising production costs, stricter environmental norms restricting the use of pesticides, foreign imports, and bureaucratic constraints.	DONE	1	0	1	1	1	0	0	0	0	0	0	0	0	0	0	0	0	0	0
farmers protesting over high production costs, among other issues they said are pertinent to their survival, rallied at Vonitsa, where they met with the Prime Minister, who was in the area for the inauguration of a new motorway. The PM said that the primary sector (agriculture) was a political priority.	DONE	1	0	0	0	0	0	0	0	0	0	0	0	0	0	0	0	0	1	1
farmers with more than 200 tractors participated in a motorcade in El Frage (Andalucia), blocking the A44 highway and junctions to other highways. The event was part of a nationwide farmers' demonstration movement, called by UdU on that day, against the ratification of the EU's free-trade agreements until partner third countries comply with the EU's agricultural standards, and in favor of fair pr…	DONE	0	1	1	0	0	1	0	0	0	0	1	0	1	0	0	0	0	0	0
around 50 farmers staged a protest in Zwickau (Sachsen), blocking several highway entrances with their tractors. The event was part of a nationwide demonstration movement called by farmers to denounce the government's plan to cut agricultural sector subsidies.	DONE	0	0	0	0	0	1	0	0	0	0	0	0	0	0	0	0	0	0	0
farmers drove at a slow pace to protest from Baleone to the Prefecture in Ajaccio (Corse). The event was part of a nationwide farmers' demonstration movement called by FNSEA and JA against rising production costs, stricter environmental norms restricting the use of pesticides, foreign imports, and bureaucratic constraints.	DONE	1	0	1	1	1	0	0	0	0	0	0	0	0	0	0	0	0	0	0
farmers protested on the A995 highway ramp at connection point 4 in Oberhaching (Bayern). The event was part of a nationwide farmers' demonstration movement against several agricultural policies of the federal government, including planned agricultural subsidy cuts.	DONE	0	0	0	0	0	1	0	0	0	0	0	0	0	0	0	1	0	0	0
in the evening, farmers blocked access to the nuclear power plant in Golfech (Occitanie) to demonstrate. The event was part of a nationwide farmers' demonstration movement called by several farmers' unions, including FNSEA and JA, against rising production costs, stricter environmental norms restricting the use of pesticides, foreign imports, and bureaucratic constraints.	DONE	1	0	1	1	1	0	0	0	0	0	0	0	0	0	0	0	0	0	0
farmers set up a road blockade on the RN57 road in Ceintrey (Grand Est). The event was part of a nationwide farmers' demonstration movement called by FNSEA and JA against rising production costs, stricter environmental norms restricting the use of pesticides, foreign imports, and bureaucratic constraints.	DONE	1	0	1	1	1	0	0	0	0	0	0	0	0	0	0	0	0	0	0
at the call of the Palestine Collective, LFI, PCF, Attac, NPA, CP, and SUD, people gathered in Millau (Occitanie) to call for a permanent halt to Israeli military operations in Gaza and express solidarity with the Palestinian people.	DONE	0	0	0	0	0	0	0	0	1	0	0	0	0	0	0	0	0	0	0
around 1,600 to 2,000 farmers staged a protest with their tractors in Erfurt (Thuringen), as part of a nationwide farmers' demonstration movement against the German government's agricultural policies, notably its plans to introduce budget cuts to Agrardiesel and remove vehicle tax exemptions.	DONE	0	0	0	0	0	1	0	0	0	0	0	0	0	0	0	1	0	0	0
farmers with 40 trucks and tractors participated in a motorcade in Velez-Rubio (Andalucia). The event was part of a nationwide farmers' demonstration movement, called by UdU on that day, against the ratification of the EU's free-trade agreements until partner third countries comply with the EU's agricultural standards, and in favor of fair production prices for Spanish farmers, relief measures to…	DONE	0	1	1	0	0	1	0	0	0	0	1	0	1	0	0	0	0	0	0
livestock breeders and farmers from the Campoo-Los Valles region with more than 50 tractors held a protest in Matamorosa (Cantabria), subsequently riding to Reinosa (Cantabria), to denounce the difficult situation they are going through due to the continuous wolf attacks in the region.	DONE	0	0	0	0	0	0	0	0	0	0	0	0	0	0	0	0	0	1	1
farmers and agricultural workers gathered in Vidin to protest against what they claim are unfair EU policies toward farmers, livestock breeders and grain producers, especially with regard to grain import policies toward Ukraine which they claim is undercutting their profits. Protests were held in around 80 locations all over Bulgaria.	DONE	0	1	1	0	1	0	0	0	0	0	0	0	1	0	0	0	1	0	0
people with around 700 tractors participated in a motorcade from Ratzeburg (Herzogtum Lauenburg, Schleswig-Holstein) to Lubeck and back. The event was part of a nationwide farmers' demonstration movement against planned agricultural subsidy cuts.	DONE	0	0	0	0	0	1	0	0	0	0	0	0	0	0	0	1	0	0	0
between 600 (according to the police) and 1,000 people (according to the report), including farmers with a convoy of 500 tractors, demonstrated in Dummerstorf (Mecklenburg-Vorpommern). The event was part of a farmers' nationwide demonstration movement against planned agricultural subsidy cuts.	DONE	0	0	0	0	0	1	0	0	0	0	0	0	0	0	0	0	0	0	0
at the national call of several organization affiliates, including from FIDL, LDH, CGT, LFI, Oxfam, UNSA, UNEF, Greenpeace, CFDT, CP, La Cimade, SM, RE, PCF, NUPES, MRAP, SOS Racism, FSU, and Attac, as well as several civil society figures, 250 people gathered in front of the Sub-prefecture of Reims (Grand Est) to call on President Emmanuel Macron not to sign into law the new immigration bill, wh…	DONE	0	0	0	0	0	0	0	0	1	0	0	0	0	0	0	0	0	0	1
several dozen farmers, with around 20 tractors, gathered in Balma (Occitanie) to protest against a delay in the payment of European aid under the Common Agricultural Policy (CAP).	DONE	0	1	1	0	0	0	0	0	0	0	0	0	0	0	0	0	0	0	0
around 80 farmers drove their vehicles near Targu Secuiesc in protest of the high insurance fees, the high fuel price, and the high taxes. The protesters also demanded a stop to the import of cereals and a review of the agricultural subsidies.	DONE	0	0	0	0	1	1	0	0	0	0	0	0	0	0	0	0	0	0	0
farmers drove at a slow pace across Ragusa (Sicilia) to demonstrate. The event was part of a national farmers' demonstration movement against the government's plan to cut agricultural sector subsidies, the economic difficulties of the sector, and the EU policies on agriculture and livestock. Regional Councilor Emanuele Dipasquale (PD) was present.	DONE	0	1	1	0	0	1	0	0	0	0	1	0	1	0	0	0	0	0	0
farmers and winemakers with 40 agricultural vehicles participated in a protest from Bad Neuenahr through the Ahrtal to Dernau (Rheinland-Pfalz). The event was part of a nationwide farmers' demonstration movement against several agricultural policies of the federal government, including planned agricultural subsidy cuts.	DONE	0	0	0	0	0	1	0	0	0	0	0	0	0	0	0	1	0	0	0
farmers and agricultural workers gathered in Sliven to protest against what they claim are unfair EU policies toward farmers, livestock breeders and grain producers, especially with regard to grain import policies toward Ukraine which they claim is undercutting their profits. Protests were held in around 80 locations all over Bulgaria.	DONE	0	1	1	0	1	0	0	0	0	0	0	0	1	0	0	0	1	0	0
dozens of farmers with tractors participated in a motorcade in Nijar (Andalucia). The event was part of a nationwide farmers' demonstration movement called by UdU against the ratification of the EU's free-trade agreements until partner third countries comply with the EU's agricultural standards, and in favor of fair production prices for Spanish farmers, relief measures to offset the consequences…	DONE	0	1	1	0	0	1	0	0	0	0	1	0	1	0	0	0	0	0	0
around 300 people, including farmers as well as the CDU mayoral candidate, with 35 vehicles protested in Sommerda (Thuringen). The event was part of a nationwide farmers' demonstration movement against planned agricultural subsidy cuts.	DONE	0	0	0	0	0	1	0	0	0	0	0	0	0	0	0	0	0	0	0
about 20 farmers with 10 tractors and 3 cars participated in a motorcade in and around Cordoba (Andalucia), riding and blocking roads in several villages around the facility. The event was part of a nationwide farmers' demonstration movement against the ratification of the EU's free-trade agreements until partner third countries comply with the EU's agricultural standards, and in favor of fair pr…	DONE	0	1	1	0	0	1	0	0	0	0	1	0	1	0	0	0	0	0	0
farmers staged a protest with their tractors along the German-Czech border in Chemnitz (Sachsen), as part of a nationwide farmers' demonstration movement against the German government's agricultural policies, notably its plans to introduce budget cuts to Agrardiesel and remove vehicle tax exemptions.	DONE	0	0	0	0	0	1	0	0	0	0	0	0	0	0	0	1	0	0	0
at the call of FNSEA, JA, and CR, farmers dumped hay, waste, and tires outside the Sub-Prefecture in Condom (Occitanie) to demand more financial state support for farmers.	DONE	0	0	0	0	0	1	0	0	0	0	1	0	0	0	0	1	0	0	0
farmers gathered near Aachen (Stadteregion Aachen), protesting against the government's cost-cutting plans for farmers, specifically regarding Agrardiesel, tolls, and vehicle taxes.	DONE	0	0	0	0	0	1	0	0	0	0	0	0	0	0	0	0	0	0	0
farmers protesting over rising production costs, among other issues, rallied at the junction of Kastanies ahead of a panhellenic meeting of farmers at Nikaia of Larissa.	DONE	1	0	0	0	0	0	0	0	0	0	0	0	0	0	0	0	0	1	1
farmers with tractors participated in a motorcade in Jumilla (Murcia), blocking the A-33 road. The event was part of a nationwide farmers' demonstration movement called by ASAJA, COAG and UPA against the ratification of the EU's free-trade agreements until partner third countries comply with the EU's agricultural standards, and in favor of fair production prices for Spanish farmers, relief measur…	DONE	0	1	1	0	0	1	0	0	0	0	1	0	1	0	0	0	0	0	0
farmers blocked a highway exit near Zmigrodek, protesting against ongoing imports of grains from Ukraine and also against what they see as an excessive bureaucracy related to the so-called Green Deal of the European Union.	DONE	0	1	1	1	1	0	0	0	0	0	0	0	0	0	0	0	0	0	0
farmers and farmers and IFA members held a protest in Cratloe (Clare) in solidarity with EU farmers protesting about regulations, income pressure, and bureaucracy. The event was part of a national day of action.	DONE	0	0	1	1	0	0	0	0	1	0	1	0	0	0	0	0	1	0	0
farmers staged a protest in Saarbrucken (Saarland), by blocking the highway with their tractors. The event was part of a nationwide demonstration movement called by farmers to denounce the government's plan to cut agricultural sector subsidies.	DONE	0	0	0	0	0	1	0	0	0	0	0	0	0	0	0	0	0	0	0
at the call of the Northern Farmers Movement (Movimento Agricultores do Norte), farmers with around 100 vehicles, including 60 light vehicles and 30 tractors, protested and blocked traffic in Valenca (Viana do Castelo). The event was part of a larger protest movement of farmers across European countries denouncing the EU's agricultural policy.	DONE	0	1	1	0	0	0	0	0	0	0	0	0	0	0	0	0	0	0	0
farmers demonstrating over high production costs and demanding better compensation payments, among other issues, five months after the devastating storm Daniel, rallied at Rizomylos of Magnesia for a third day.	DONE	0	0	0	0	0	0	1	0	0	0	0	0	0	0	0	0	0	1	1
around 100 farmers dumped soil and waste on a highway toll barrier in Perpignan (Occitanie). The event was part of a nationwide farmers' demonstration movement called by FNSEA and JA against rising production costs, stricter environmental norms restricting the use of pesticides, foreign imports, and bureaucratic constraints.	DONE	1	0	1	1	1	0	0	0	0	0	0	0	0	0	0	0	0	0	0
farmers with tractors and on foot participated in a procession on the A62 highway and the N620 road near Fuentes de Onoro (Castilla y Leon). The event was part of a nationwide farmers' demonstration movement against the ratification of the EU's free-trade agreements until partner third countries comply with the EU's agricultural standards, and in favor of fair production prices for Spanish farmer…	DONE	0	1	1	0	0	1	0	0	0	0	1	0	1	0	0	0	0	0	0
in the afternoon, a good dozen tractors driven by farmers rallied outside the town hall in Twistringen (Niedersachsen) to demonstrate against the federal government's agricultural policies. The event was part of a nationwide farmers' demonstration movement against, among other things, planned agricultural subsidy cuts.	DONE	0	0	0	0	0	1	0	0	0	0	0	0	0	0	0	1	0	0	0
farmers and minor agricultural entrepreneurs with their vehicles gathered for a demonstrative ride through Presov, protesting against ongoing import of grains from Ukraine to Europe.	DONE	0	0	0	0	0	1	0	0	0	0	0	0	0	0	0	0	0	0	0
at the national call of several organization affiliates, including from FIDL, LDH, CGT, LFI, Oxfam, UNSA, UNEF, Greenpeace, CFDT, CP, La Cimade, SM, RE, PCF, NUPES, MRAP, SOS Racism, FSU, and Attac, as well as several civil society figures, over 100 people, including NUPES, PCF, AFPS, XR, RASM - Avallonnais network of support for migrants (Reseau avallonnais de soutien aux migrants), MRAP, and Ca…	DONE	0	0	0	0	0	0	0	0	1	0	0	0	0	0	0	0	0	0	1
farmers with tractors participated in a motorcade in Badajoz (Extremadura). The event was part of a nationwide farmers' demonstration movement called by ASAJA, COAG and UPA against the ratification of the EU's free-trade agreements until partner third countries comply with the EU's agricultural standards, and in favor of fair production prices for Spanish farmers, relief measures to offset the co…	DONE	0	1	1	0	0	1	0	0	0	0	1	0	1	0	0	0	0	0	0
farmers who left from neighboring localities drove at a slow pace and then converged and gathered in Longwy (Grand Est). The event was part of a nationwide farmers' demonstration movement called by FNSEA and JA against rising production costs, stricter environmental norms restricting the use of pesticides, foreign imports, and bureaucratic constraints.	DONE	1	0	1	1	1	0	0	0	0	0	0	0	0	0	0	0	0	0	0
farmers blocked a highway near Michow, protesting against ongoing imports of Ukrainian grains to the EU and demanding higher support to the national agriculture.	DONE	0	0	0	0	1	0	0	0	0	0	0	0	0	0	0	1	0	0	0
around 100 people, including some belonging to the right-wing, craftsmen, farmers and some 'Frankfurt Free Spirits' (Frankfurter Freigeister) members, blocked a road and participated in a protest in front of the Kleist Forum in Frankfurt (Oder) (Brandenburg), where the Minister of Labor was holding a citizens' dialogue. They demanded a dialogue with the minister and criticized the federal coaliti…	DONE	0	0	0	0	0	0	0	0	0	0	1	0	0	0	0	1	0	0	0
farmers with their vehicles blocked the border crossing point with Austria near Mikulov, protesting against what they see as a low state support to the national agriculture. Rallies, rides and gatherings took place at other locations across the country as well.	DONE	0	0	0	0	0	0	0	0	0	0	0	0	0	0	0	1	0	0	0
farmers set up a road blockade on the A72 highway in Saint-Etienne (Auvergne-Rhone-Alpes). The event was part of a nationwide farmers' demonstration movement called by FNSEA and JA against rising production costs, stricter environmental norms restricting the use of pesticides, foreign imports, and bureaucratic constraints.	DONE	1	0	1	1	1	0	0	0	0	0	0	0	0	0	0	0	0	0	0
at the call of FNSEA and JA, around 20 farmers dumped manure and blocked the road exit to the Leclerc de Blagnac market near Toulouse (Occitanie). Inside the hypermarket, farmers labeled foreign products. The event was part of a nationwide farmers' demonstration movement against rising production costs, stricter environmental norms restricting the use of pesticides, foreign imports, and bureaucra…	DONE	1	0	1	1	1	0	0	0	0	0	0	0	0	0	0	0	0	0	0
about 130 people, including farmers and other entrepreneurs as well as the 'Citizens' initiative for Basic Rights region Kyritz' (Burgerinitiative fur Grundrechte Region Kyritz), participated in the second 'People's Demonstration' (Volksdemo) in Kyritz (Brandenburg) against the federal government's politics and local politicians as well as for intact hospitals, better pensions and an affordable l…	DONE	0	0	0	0	0	0	0	0	0	0	1	0	0	0	0	1	0	0	0
an unknown number of farmers blocked access to the distribution centre of the supermarket chain Aldi in Turnhout (Vlaanderen) to demonstrate. The event was part of a nationwide demonstration by farmers against EU agricultural regulations, their national government's nitrogen policy, a lack of consideration for their work, and low production prices.	DONE	0	1	1	0	0	0	0	1	0	0	0	0	0	0	0	1	1	0	0
farmers protesting over rising production costs, among other issues, rallied in Farsala central square with their tractors. They were carrying Greek flags and honking their horns as a large crowd welcomed the protesters. The farmers and livestock breeders of the E65 blockade placed hay bales and corn in the square and poured milk on animal feed.	DONE	0	0	0	0	0	0	0	0	0	0	0	0	1	0	0	1	0	1	1
around 40 farmers blocked access to a Leclerc supermarket in Saumur (Hauts-de-France). The event was part of a nationwide farmers' demonstration movement called by FNSEA and JA against rising production costs, stricter environmental norms restricting the use of pesticides, foreign imports, and bureaucratic constraints.	DONE	1	0	1	1	1	0	0	0	0	0	0	0	0	0	0	0	0	0	0
farmers protested and blocked the A29 highway ramp in Grossenkneten (Oldenburg, Niedersachsen). The event was part of a nationwide farmers' demonstration movement against planned agricultural subsidy cuts.	DONE	0	0	0	0	0	1	0	0	0	0	0	0	0	0	0	0	0	0	0
farmers set up a road blockade on the A6 and A31 highways in Dijon (Bourgogne-Franche-Comte). The event was part of a nationwide farmers' demonstration movement called by FNSEA and JA against rising production costs, stricter environmental norms restricting the use of pesticides, foreign imports, and bureaucratic constraints.	DONE	1	0	1	1	1	0	0	0	0	0	0	0	0	0	0	0	0	0	0
50 farmers with tractors participated in a motorcade through the C-4 highway in Pont, the C1412b highway in Pallars Jussa, and the N230 highway in El Pont de Suert, before heading to Vielha (Cataluna). The event was part of a nationwide farmers' demonstration movement against the ratification of the EU's free-trade agreements until partner third countries comply with the EU's agricultural standar…	DONE	0	1	1	0	0	1	0	0	0	0	1	0	1	0	0	0	0	0	0
farmers and fishers gathered in Emden (Niedersachsen), blocking traffic, to demonstrate. The event was part of a farmers' nationwide demonstration movement against planned agricultural subsidy cuts.	DONE	0	0	0	0	0	1	0	0	0	0	0	0	0	0	0	0	0	0	0
around 350 people, including farmers, staged a protest in Furth (Bayern), as part of a nationwide farmers' demonstration movement against the German government's agricultural policies, notably its plans to introduce budget cuts to Agrardiesel and remove vehicle tax exemptions.	DONE	0	0	0	0	0	1	0	0	0	0	0	0	0	0	0	1	0	0	0
farmers with tractors participated in a motorcade in and around Girona (Cataluna), blocking the AP-7 in Vilademulls, the C-38 in Mollo and the N-II in Pontos (all Cataluna) [coded to Girona]. The event was part of a nationwide farmers' demonstration movement against the ratification of the EU's free-trade agreements until partner third countries comply with the EU's agricultural standards, and in…	DONE	0	1	1	0	0	1	0	0	0	0	1	0	1	0	0	0	0	0	0
an unknown number of farmers blocked part of the Brussels ring near Halle (Vlaanderen) to demonstrate. The event was part of a nationwide demonstration by farmers against EU agricultural regulations, their national government's nitrogen policy, a lack of consideration for their work, and low production prices.	DONE	0	1	1	0	0	0	0	1	0	0	0	0	0	0	0	1	1	0	0
farmers and agricultural workers gathered in Dalgopol to protest against what they claim are unfair EU policies toward farmers, livestock breeders and grain producers, especially with regard to grain import policies toward Ukraine which they claim is undercutting their profits. Protests were held in around 80 locations all over Bulgaria.	DONE	0	0	0	0	1	0	0	0	0	0	0	0	1	0	0	0	1	0	0
farmers and truck drivers protested in Constanta, trying to block the ring road of the city in protest of the high insurance fees, high fuel prices, and the facilitated access of Ukrainian exporters in Romania's ports. The police blocked the protesters from shutting down the road completely and even threatened, in one instance, a protesting driver of a car with a non-lethal shotgun.	DONE	1	0	0	0	1	0	0	0	0	0	0	0	0	0	0	0	0	0	0
around 150 farmers, with 50 tractors, rode through the streets of Auxerre (Bourgogne-Franche-Comte) with their tractors, riding at a slow pace, to demonstrate. The event was part of a nationwide farmers' demonstration movement called by FNSEA against rising production costs, stricter environmental norms restricting the use of pesticides, foreign imports, and bureaucratic constraints.	DONE	1	0	1	1	1	0	0	0	0	0	0	0	0	0	0	0	0	0	0
farmers with tractors participated in a motorcade in Villanueva de San Juan (Andalucia), blocking the A-406 road. The event was part of a nationwide farmers' demonstration movement against the ratification of the EU's free-trade agreements until partner third countries comply with the EU's agricultural standards, and in favor of fair production prices for Spanish farmers, relief measures to offse…	DONE	0	1	1	0	0	1	0	0	0	0	1	0	1	0	0	0	0	0	0
farmers set up a road blockade on the D1089 road in Libourne (Nouvelle-Aquitaine). The event was part of a nationwide farmers' demonstration movement called by FNSEA and JA against rising production costs, stricter environmental norms restricting the use of pesticides, foreign imports, and bureaucratic constraints.	DONE	1	0	1	1	1	0	0	0	0	0	0	0	0	0	0	0	0	0	0
farmers with 35 vehicles organized a demonstrative ride through Jihlava. The gathering was a part of nation-wide protest against persisting problems in the agricultural sectors, including the so-called Green Deal restrictions or the ongoing imports of grain from Ukraine.	DONE	0	1	1	0	1	0	0	0	0	0	0	0	0	0	0	0	0	0	0
farmers demonstrated in Bayeux (Normandie). The event was part of a nationwide farmers' demonstration movement called by FNSEA and JA against rising production costs, stricter environmental norms restricting the use of pesticides, foreign imports, and bureaucratic constraints.	DONE	1	0	1	1	1	0	0	0	0	0	0	0	0	0	0	0	0	0	0
farmers with 500 tractors participated in a motorcade through Valls and L'Aldea (both Cataluna), blocking the A-27 road. The event was part of a nationwide farmers' demonstration movement, called by Unio de Pagesos and Revolta Pagesa, against the ratification of the EU's free-trade agreements until partner third countries comply with the EU's agricultural standards, and in favor of fair productio…	DONE	0	1	1	0	0	1	0	0	0	0	1	0	1	0	0	0	0	0	0
farmers set up a road blockade on the A26 highway in Cerise (Normandie). The event was part of a nationwide farmers' demonstration movement called by FNSEA and JA against rising production costs, stricter environmental norms restricting the use of pesticides, foreign imports, and bureaucratic constraints.	DONE	1	0	1	1	1	0	0	0	0	0	0	0	0	0	0	0	0	0	0
farmers set up a road blockade on the A62 highway in La Reole (Nouvelle-Aquitaine). The event was part of a nationwide farmers' demonstration movement called by FNSEA and JA against rising production costs, stricter environmental norms restricting the use of pesticides, foreign imports, and bureaucratic constraints.	DONE	1	0	1	1	1	0	0	0	0	0	0	0	0	0	0	0	0	0	0
at the call of FNSEA and JA, around 100 farmers gathered outside the Court of Justice in Annecy (Auvergne-Rhone-Alpes) to express solidarity with 2 farmers who were on trial for dumping manure during a protest in Pringy. The event was part of a nationwide farmers' demonstration movement called by FNSEA and JA against rising production costs, stricter environmental norms restricting the use of pes…	DONE	1	0	1	1	1	0	0	0	0	0	0	0	0	0	0	0	0	0	0
farmers with about 15 tractors gathered in Lainate (Lombardia) to demonstrate. The event was part of a nationwide farmers' demonstration movement against the government's plan to cut agricultural sector subsidies, the economic difficulties of the sector, and the EU agricultural and livestock policies.	DONE	0	1	1	0	0	1	0	0	0	0	1	0	1	0	0	0	0	0	0
farmers gathered in Brion (Centre-Val de Loire) to demonstrate. The event was part of a nationwide farmers' demonstration movement called by FNSEA and JA against rising production costs, stricter environmental norms restricting the use of pesticides, foreign imports, and bureaucratic constraints.	DONE	1	0	1	1	1	0	0	0	0	0	0	0	0	0	0	0	0	0	0
around 150 farmers, truck drivers, and artisans gathered in front of the town center in Hohentengen am Hochrhein (Baden-Wurttemberg), demanding improved agricultural policies and toll fees for trucks. The protesters met with the members of the district council group.	DONE	0	0	0	0	0	0	0	0	0	0	0	0	0	0	1	1	0	0	0
several farmers blocked the road in Viechtach (Regen), protesting against the government's cost-cutting plans for farmers, specifically regarding Agrardiesel, tolls, and vehicle taxes.	DONE	0	0	0	0	0	1	0	0	0	0	0	0	0	0	0	1	0	0	0
farmers protesting over rising production costs, among other issues, laid manure on a table to express their disappointment during a peaceful protest in the office of the ruling party New Democracy MP in Kastoria.	DONE	1	0	0	0	0	0	0	0	0	0	0	0	0	0	0	0	0	1	1
at the call of Spontaneous Farmers' Committee Pordenone (Comitato Spontaneo Agricoltori Pordenone), around 200 farmers with 117 tractors rode, at slow pace, in Pordenone (Friuli-Venezia Giulia), The event is part of a nationwide farmers' demonstration movement called by RA against the government's plan to cut agricultural sector subsidies, the economic difficulties of the sector, and the EU polic…	DONE	0	1	1	0	0	1	0	0	0	0	1	0	1	0	0	0	0	0	0
farmers blocked the road with their vehicles in Stara Pazova, demanding improved working conditions and state subventions necessary for their existence.	DONE	0	0	0	0	0	0	0	1	0	0	1	0	0	0	0	1	0	0	0
farmers of Imathia and Pieria protesting over high production costs, among other issues, blocked one lane of the Egnatia highway at the Alexandreia junction for 1 hour. The protesters also marched on foot.	DONE	1	0	0	0	0	0	0	1	0	0	0	0	0	0	0	0	0	1	0
around 15 tractors demonstrated as a convoy from Plouay to Lorient (Bretagne) to participate in a protest. The event was part of a nationwide farmers' demonstration movement against rising production costs, stricter environmental norms restricting the use of pesticides, foreign imports, and bureaucratic constraints.	DONE	1	0	1	1	1	0	0	0	0	0	0	0	0	0	0	0	0	0	0
farmers gathered with their machines in Czluchow, protesting against the proposed extension of agricultural trade with Ukraine and demanding higher institutional and financial support from their government.	DONE	0	0	0	0	1	0	0	0	0	0	0	0	0	0	0	1	0	0	0
farmers gathered with their machines near Zlotoryja, protesting against the proposed extension of agricultural trade with Ukraine and demanding higher institutional and financial support from their government.	DONE	0	0	0	0	1	0	0	0	0	0	0	0	0	0	0	1	0	0	0
farmers demonstrated in Vittel (Grand Est). The event was part of a nationwide farmers' demonstration movement called by FNSEA and JA against rising production costs, stricter environmental norms restricting the use of pesticides, foreign imports, and bureaucratic constraints.	DONE	1	0	1	1	1	0	0	0	0	0	0	0	0	0	0	0	0	0	0
farmers with tractors participated in a motorcade along the A-5 highway near Santa Olalla (Castilla-La Mancha). The event was part of a nationwide farmers' demonstration movement against the ratification of the EU's free-trade agreements until partner third countries comply with the EU's agricultural standards, and in favor of fair production prices for Spanish farmers, relief measures to offset …	DONE	0	1	1	0	0	1	0	0	0	0	1	0	1	0	0	0	0	0	0
upwards of 300 to 350 farmers and IFA members held a protest in Cork (Cork) in solidarity with EU farmers protesting about regulation, income pressure, and bureaucracy. The event was part of a national day of action.	DONE	0	0	1	1	0	0	0	0	0	0	1	0	0	0	0	1	0	0	0
in the evening, a small group of farmers gathered in Scheven (Nordrhein-Westfalen) to demonstrate. The event was part of a nationwide farmers' demonstration movement against planned agricultural subsidy cuts.	DONE	0	0	0	0	0	1	0	0	0	0	0	0	0	0	0	0	0	0	0
at the call of CR, farmers gathered in Marle (Hauts-de-France) to demonstrate. The event was part of a nationwide farmers' demonstration movement called by FNSEA and JA against rising production costs, stricter environmental norms restricting the use of pesticides, foreign imports, and bureaucratic constraints.	DONE	1	0	1	1	1	0	0	0	0	0	0	0	0	0	0	0	0	0	0
